# Supplementary material for: Building-block approach to discrete and sequence-specific oligosiloxanes
Source: Royal Society of Chemistry journal article supplement (doi:10.1039/d4py00527a), 2024-01-01
Supplement: d4py00527a1.pdf [file d4py00527a1.pdf]

*Supplementary Information*

***Building-Block Approach to Discrete and Sequence-Specific  
Oligosiloxanes***

Takahiro Kawatsu, Hiroyuki Minamikawa, Kazuhiko Sato, and Kazuhiro Matsumoto\*

National Institute of Advanced Industrial Science and Technology (AIST), 1-1-1 Higashi,  
Tsukuba, Ibaraki 305-8565, Japan

\* E-mail: [kazuhiro.matsumoto@aist.go.jp](mailto:kazuhiro.matsumoto@aist.go.jp)

## *Table of Contents*

|                                                                                                                   |     |
|-------------------------------------------------------------------------------------------------------------------|-----|
| General Information .....                                                                                         | S2  |
| Preparation of Building Blocks and Starting Materials .....                                                       | S3  |
| Preparation of 26-mer <b>1</b> , <b>7</b> , <b>10</b> , and <b>13</b> .....                                       | S12 |
| $^1\text{H}$ , $^{13}\text{C}\{^1\text{H}\}$ , and $^{29}\text{Si}\{^1\text{H}\}$ NMR Charts (Figure S1-S45)..... | S17 |
| References .....                                                                                                  | S62 |

## ***General Information***

All experimental manipulations were performed under a nitrogen atmosphere using Schlenk techniques or a MBRAUN LABmaster Pro SP glove box. NMR spectra were recorded on a Bruker AVANCE III HD ( $^1\text{H}$  NMR at 600 MHz;  $^{13}\text{C}\{^1\text{H}\}$  NMR at 150 MHz;  $^{29}\text{Si}\{^1\text{H}\}$  NMR at 119MHz) NMR spectrometer with a CryoProbe. The  $^1\text{H}$  NMR (600 MHz),  $^{13}\text{C}\{^1\text{H}\}$  NMR (150 MHz) and  $^{29}\text{Si}\{^1\text{H}\}$  NMR (119 MHz) chemical shifts are reported in  $\delta$  (ppm) and are referenced to tetramethylsilane (TMS:  $\delta = 0$  ppm) or the residual solvent resonance as an internal standard. The matrix-assisted laser desorption ionization time-of-flight (MALDI-TOF) mass spectra were collected on a Bruker Autoflex Speed. Differential scanning calorimetry (DSC) was carried out at a heating rate of 5 K/min on a Hitachi High-Tec DSC7020 calorimeter. The samples were sealed in aluminum pans. X-ray diffraction measurements were carried out on a Rigaku R-AXIS IV X-ray diffractometer with a  $\text{CuK}\alpha$  line ( $\lambda = 0.1542$  nm, 40 kV, 30 mA). The samples were sealed in Lindman glass capillaries (1.5 mm o. d., 10  $\mu\text{m}$  wall thickness). The shear viscosity was measured on an Anton-Paar MCR302 rheometer equipped with Peltier temperature control devices using a parallel plate (25 mm $\phi$ ). Column chromatography was performed with a Yamazen EPCLC AI-580S using a Universal<sup>TM</sup> Column Premium (silica gel, 30  $\mu\text{m}$ ). Gel Permeation Chromatography (GPC) was performed with a JAI LaboACE LC-780 using a JAIGEL-2HR-40 column.

All chemicals were reagent grade and used as received without further purification. Tris(pentafluorophenyl)borane ( $\text{B}(\text{C}_6\text{F}_5)_3$ ), diphenylsilane ( $\text{Ph}_2\text{SiH}_2$ ), 1,1,5,5-tetramethyl-3,3-diphenyltrisiloxane, diphenylsilanediol were purchased from Tokyo Chemical Industry Co., Ltd. Toluene, *n*-hexane, acetone,  $\text{CH}_2\text{Cl}_2$ , trichloroisocyanuric acid, chlorotrimethylsilane ( $\text{Me}_3\text{SiCl}$ ), chlorodimethylsilane ( $\text{Me}_2\text{HSiCl}$ ), triethylamine ( $\text{Et}_3\text{N}$ ), 2-propanol and  $\text{CDCl}_3$  were purchased from Fujifilm Wako Pure Chemical Corporation. Alumina (activated, neutral, Brockmann I) was purchased from Aldrich. Palladium-activated carbon (Pd/C) was purchased from N.E.CHEMCAT. 1,1,3,3,5,5,7,7-octamethylsiloxane ( $^{\text{H}}\text{MD}_2\text{M}^{\text{H}}$ ) and 1,1,3,3,5,5,7,7,7-nonamethyltetrasiloxane-1-ol were prepared by previously reported procedures<sup>S1,2</sup>.

## Preparation of Building Blocks and Starting Materials

### 9-Isopropoxy-3,3,7,7-tetramethyl-1,1,5,5,9,9-hexaphenylpentasiloxane-1-ol (**2**)

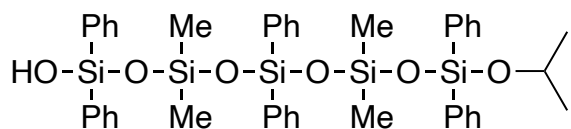

$\text{B}(\text{C}_6\text{F}_5)_3$  (51.2 mg, 0.1 mmol) was dissolved in toluene (80 mL). To the mixture was added acetone (2.95 mL, 40 mmol) and then 1,1,5,5-tetramethyl-3,3-diphenyltrisiloxane (6.65 mL, 20 mmol) with stirring at room temperature. After 30 min,  $\text{Ph}_2\text{SiH}_2$  (7.37 mL, 40 mmol) was added. After 30 min, the reaction mixture was passed through a short alumina pad (eluent: *n*-hexane). The crude product was dissolved in THF (60 mL) and cooled down to  $-80\text{ }^\circ\text{C}$  and kept under constant stirring. To the solution was added trichloroisocyanuric acid (1.53 g, 6.67 mmol) in portions. After the addition was completed, the cooling bath was removed, and the solution was allowed to reach room temperature for 12 h. To the reaction mixture was added triethylamine (5.6 mL, 40 mmol) and 2-propanol (3.1 mL, 40 mmol). After 4 h, the reaction mixture was passed through a short alumina pad (eluent: *n*-hexane). The crude product was dissolved in THF (60 mL) again. To the solution was added 5% palladium carbon (40 mg, 0.02 mmol) and  $\text{H}_2\text{O}$  (0.72 g, 40 mmol), and the reaction mixture was refluxed. After 12 h, the reaction mixture was passed through a short celite pad (eluent:  $\text{CH}_2\text{Cl}_2$ ). The crude product was purified by silica-gel column chromatography (*n*-hexane:  $\text{CH}_2\text{Cl}_2$  = 1:1) to give 9-isopropoxy-3,3,7,7-tetramethyl-1,1,5,5,9,9-hexaphenylpentasiloxane-1-ol (**2**) (7.21 g, 45%) as a colorless oil.

$^1\text{H}$  NMR (600 MHz,  $\text{CDCl}_3$ ):  $\delta$  7.59-7.50 (m, 12H), 7.41-7.33 (m, 6H), 7.32-7.20 (m, 12H), 4.11 (septet,  $J$  = 6.1 Hz, 1H), 2.31 (s, 1H), 1.12 (d,  $J$  = 6.1 Hz, 6H), 0.10, (s, 6H), 0.07 ppm (s, 6H).

$^{13}\text{C}\{^1\text{H}\}$  NMR (150 MHz,  $\text{CDCl}_3$ ):  $\delta$  135.5, 135.0, 134.9, 134.6, 134.3, 134.2, 130.1, 129.9, 129.8, 127.72, 127.66, 127.6, 65.7, 25.6, 1.3, 1.2 ppm.

$^{29}\text{Si}\{^1\text{H}\}$  NMR (119 MHz,  $\text{CDCl}_3$ ):  $\delta$   $-18.3$ ,  $-19.1$ ,  $-38.3$ ,  $-41.7$ ,  $-48.0$  ppm.

HRMS (MALDI-TOF):  $m/z$  calcd for  $[\text{C}_{43}\text{H}_{50}\text{O}_6\text{Si}_5\text{Na}]^+$  (M+Na): 825.24; found 825.26.

### 1-Isopropoxy-3,3,7,7,11,11,11-heptamethyl-1,1,5,5,9,9-hexaphenylhexasiloxane (3)

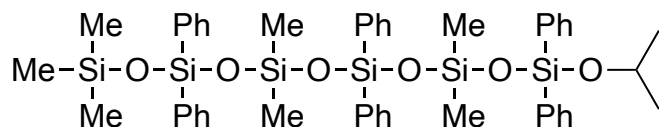

9-Isopropoxy-3,3,7,7-tetramethyl-1,1,5,5,9,9-hexaphenylpentasiloxane-1-ol (**2**) (1.21 g, 1.5 mmol) was dissolved in CH<sub>2</sub>Cl<sub>2</sub> (6.0 mL). To the solution was added Et<sub>3</sub>N (553 μL, 3.0 mmol) and Me<sub>3</sub>SiCl (381 μL, 3.0 mmol) at room temperature and then the mixture was stirred overnight. The reaction mixture was passed through a short alumina pad (eluent: *n*-hexane). The crude product was passed through a short silica-gel pad (eluent: *n*-hexane/CH<sub>2</sub>Cl<sub>2</sub> = 5:1) to give 1-isopropoxy-3,3,7,7,11,11,11-heptamethyl-1,1,5,5,9,9-hexaphenylhexasiloxane (**3**) (1.31 g, >95%) as a colorless oil.

<sup>1</sup>H NMR (600 MHz, CDCl<sub>3</sub>): 7.61-7.55 (m, 4H), 7.55-7.48 (m, 8H), 7.39-7.31 (m, 6H), 7.30-7.24 (m, 8H), 7.21 (dd, *J* = 7.5, 7.3 Hz, 4H), 4.12 (sept, *J* = 6.1 Hz, 1 H), 1.12 (d, *J* = 6.1 Hz, 6 H), 0.08-0.05 (m, 15 H), 0.04 ppm (s, 6 H)

<sup>13</sup>C{<sup>1</sup>H} NMR (125 MHz, CDCl<sub>3</sub>): δ 136.1, 135.6, 135.0, 134.6, 134.3, 134.2, 129.8, 129.72, 129.68, 127.61, 127.56, 65.6, 25.6, 1.9, 1.33, 1.30 ppm.

<sup>29</sup>Si{<sup>1</sup>H} NMR (119 MHz, CDCl<sub>3</sub>): δ 9.9, -19.4, -19.5, -41.9, -47.8, -48.1 ppm.

HRMS (MALDI-TOF): *m/z* calcd for [C<sub>46</sub>H<sub>58</sub>O<sub>6</sub>Si<sub>6</sub>Na]<sup>+</sup> (M+Na): 897.27; found 897.29.

### 3-Isopropoxy-1,1,3,3-tetraphenyldisiloxan-1-ol

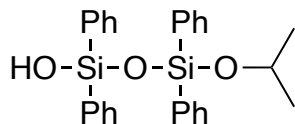

B(C<sub>6</sub>F<sub>5</sub>)<sub>3</sub> (102.4 mg, 0.20 mmol) was dissolved in toluene (80 mL). To the solution was added Ph<sub>2</sub>SiH<sub>2</sub> (7.37 mL, 40 mmol) and then acetone (1.47 mL, 20 mmol) over 5 min at room temperature. After 10 min, acetone (1.47 mmol, 20 mmol) was added. After 1 h, the reaction mixture was passed through a short alumina pad (eluent: *n*-hexane). The crude product was dissolved in THF (60 mL). To the solution was added 5% palladium carbon (40 mg, 0.04 mmol) and H<sub>2</sub>O (0.72 g, 40 mmol), and the reaction mixture was refluxed. After 16 h, the reaction mixture was passed through a short celite pad (eluent: CH<sub>2</sub>Cl<sub>2</sub>). The crude product was purified by silica-gel column chromatography (eluent: *n*-hexane/CH<sub>2</sub>Cl<sub>2</sub> = 1:2) to give 3-isopropoxy-1,1,3,3-tetraphenyldisiloxan-1-ol (4.28 g, 47%) as a colorless oil.

$^1\text{H}$  NMR (600 MHz,  $\text{CDCl}_3$ ):  $\delta$  7.70-7.58 (m, 8H), 7.44-7.35 (m, 4H), 7.35-7.27 (m, 8H), 4.19 (septet,  $J = 6.1$  Hz, 1H), 2.78 (br s, 1H), 1.11 ppm (d,  $J = 6.1$  Hz, 6H).

$^{13}\text{C}\{^1\text{H}\}$  NMR (125 MHz,  $\text{CDCl}_3$ ):  $\delta$  134.65, 134.62, 134.44, 134.38, 130.2, 130.1, 127.79, 127.75, 66.0, 25.5 ppm.

$^{29}\text{Si}\{^1\text{H}\}$  NMR (119 MHz,  $\text{CDCl}_3$ ):  $\delta$  -36.9, -40.1 ppm.

HRMS (MALDI-TOF):  $m/z$  calcd for  $[\text{C}_{27}\text{H}_{28}\text{O}_3\text{Si}_3\text{Na}]^+$  (M+Na): 479.15; found 479.14.

### 1-Isopropoxy-5,5,5-trimethyl-1,1,3,3-tetraphenyltrisiloxane (8)

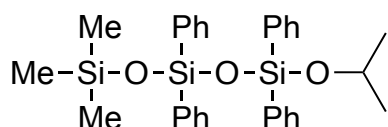

$\text{B}(\text{C}_6\text{F}_5)_3$  (128 mg, 0.25 mmol) and isopropoxytrimethylsilane (870  $\mu\text{L}$ , 5.0 mmol) were dissolved in toluene (20 mL). To the solution was added  $\text{Ph}_2\text{SiH}_2$  (922  $\mu\text{L}$ , 5.0 mmol). After 20 min, acetone (369  $\mu\text{L}$ , 5.0 mmol) was added. After 20 min,  $\text{Ph}_2\text{SiH}_2$  (922  $\mu\text{L}$ , 5.0 mmol) was added. After 20 min, acetone (553  $\mu\text{L}$ , 7.5 mmol) was added. After 30 min, the reaction mixture was passed through a short alumina pad (eluent: *n*-hexane). The crude product was purified by GPC (eluent: *n*-hexane) to give 1-isopropoxy-5,5,5-trimethyl-1,1,3,3-tetraphenyltrisiloxane (**8**) (1.30 g, 49%) as a colorless oil.

$^1\text{H}$  NMR (600 MHz,  $\text{CDCl}_3$ ):  $\delta$  7.64-7.55 (m, 8H), 7.40-7.34 (m, 4H), 7.32-7.27 (m, 8H), 4.16 (septet,  $J = 6.1$  Hz, 1H), 1.09 (d,  $J = 6.1$  Hz, 6H), 0.01 ppm (s, 9H).

$^{13}\text{C}\{^1\text{H}\}$  NMR (125 MHz,  $\text{CDCl}_3$ ):  $\delta$  135.8, 134.8, 134.7, 134.3, 129.9, 129.8, 127.6, 65.8, 25.5, 1.8 ppm.

$^{29}\text{Si}\{^1\text{H}\}$  NMR (119 MHz,  $\text{CDCl}_3$ ):  $\delta$  10.1, -41.1, -47.3 ppm.

HRMS (MALDI-TOF):  $m/z$  calcd for  $[\text{C}_{30}\text{H}_{36}\text{O}_3\text{Si}_3\text{Na}]^+$  (M+Na): 551.19; found 551.17.

### 5-Isopropoxy-1,1-dimethyl-3,3,5,5-tetraphenyltrisiloxan-1-ol (9)

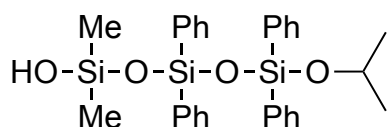

3-Isopropoxy-1,1,3,3-tetraphenyldisiloxan-1-ol (5.86 g, 12.8 mmol) was dissolved in  $\text{CH}_2\text{Cl}_2$  (40 mL). To the solution was added  $\text{Et}_3\text{N}$  (2.7 mL, 19.3 mmol) and then  $\text{HSiMe}_2\text{Cl}$  (2.1 mmol, 19.3 mmol) with stirring at room temperature. After 1 h, the reaction mixture was passed through a short alumina pad (eluent: *n*-hexane). The crude

product was dissolved in THF (60 mL) again. The solution was added to a mixture of 5% palladium carbon (40 mg, 0.02 mmol) and H<sub>2</sub>O (0.72 g, 40 mmol) in THF (30 mL) with stirring at room temperature. After 30 min, the reaction mixture was passed through a short celite pad (eluent: CH<sub>2</sub>Cl<sub>2</sub>) to give 5-isopropoxy-1,1-dimethyl-3,3,5,5-tetraphenyltrisiloxan-1-ol (**9**) (6.72 g, 99%) as a colorless solid.

<sup>1</sup>H NMR (600 MHz, CDCl<sub>3</sub>): δ 7.64-7.59 (m, 8H), 7.43-7.35 (m, 4H), 7.35-7.28 (m, 8H), 4.15 (septet, *J* = 6.1 Hz, 1H), 2.54 (s, 1H), 1.10 (d, *J* = 6.1 Hz, 6H), 0.03 ppm (s, 6H).

<sup>13</sup>C{<sup>1</sup>H} NMR (150 MHz, CDCl<sub>3</sub>): δ 135.3, 134.8, 134.24, 134.22, 130.2, 130.0, 127.8, 127.7, 66.3, 25.4, 0.2 ppm.

<sup>29</sup>Si{<sup>1</sup>H} NMR (119 MHz, CDCl<sub>3</sub>): δ -9.0, -39.8, -46.6 ppm.

HRMS (MALDI-TOF): *m/z* calcd for [C<sub>29</sub>H<sub>34</sub>O<sub>4</sub>Si<sub>3</sub>Na]<sup>+</sup> (M+Na): 553.17; found 553.16.

### 5-Isopropoxy-1,1,3,3,5,5-hexaphenyltrisiloxan-1-ol

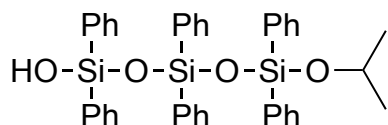

B(C<sub>6</sub>F<sub>5</sub>)<sub>3</sub> (51.2 mg, 0.10 mmol) and Ph<sub>2</sub>Si(OH)<sub>2</sub> (4.33 g, 20 mmol) was dissolved in toluene (80 mL). To the solution was added Ph<sub>2</sub>SiH<sub>2</sub> (7.37 mL, 40 mmol) with stirring at 0 °C. After the addition, the cooling bath was removed, and the solution was allowed to reach room temperature. After 30 min, the reaction mixture was passed through a short alumina pad (eluent: *n*-hexane). The crude product was dissolved in THF (60 mL) and cooled down to -80 °C and kept under constant stirring. To the solution was added trichloroisocyanuric acid (1.53 g, 6.67 mmol) in portions. After the addition was completed, the cooling bath was removed, and the solution was allowed to reach room temperature for 12 h. To the reaction mixture was added triethylamine (5.6 mL, 40 mmol) and 2-propanol (3.1 mL, 40 mmol). After 3 h, the reaction mixture was passed through a short alumina pad (eluent: *n*-hexane). The crude product was dissolved in THF (60 mL) again. To the solution was added 5% palladium carbon (40 mg, 0.02 mmol) and H<sub>2</sub>O (0.72 g, 40 mmol), and the reaction mixture was refluxed. After 12 h, the reaction mixture was passed through a short celite pad (eluent: CH<sub>2</sub>Cl<sub>2</sub>). The crude product was purified by silica-gel column chromatography (CH<sub>2</sub>Cl<sub>2</sub>) to give 5-isopropoxy-1,1,3,3,5,5-hexaphenyltrisiloxan-1-ol (3.77 g, 29%) as a colorless solid.

<sup>1</sup>H NMR (600 MHz, CDCl<sub>3</sub>): δ 7.59-7.55 (m, 4H), 7.55-7.49 (m, 8H), 7.38-7.32 (m, 6H),

7.28-7.19 (m, 12H), 4.10 (septet,  $J = 6.1$  Hz, 1H), 3.33 (s, 1H), 1.04 ppm (d,  $J = 6.1$  Hz, 6H).

$^{13}\text{C}\{^1\text{H}\}$  NMR (150 MHz,  $\text{CDCl}_3$ ):  $\delta$  134.8, 134.73, 134.72, 134.39, 134.37, 133.91, 130.1, 130.05, 130.0, 127.71, 127.66, 127.6, 66.4, 25.3 ppm.

$^{29}\text{Si}\{^1\text{H}\}$  NMR (119 MHz,  $\text{CDCl}_3$ ):  $\delta$  -36.8, -39.4, -45.0 ppm.

HRMS (MALDI-TOF):  $m/z$  calcd for  $[\text{C}_{39}\text{H}_{36}\text{O}_4\text{Si}_3\text{Na}]^+$  (M+Na): 677.20; found 677.18.

### 1-Isopropoxy-7,7,7-trimethyl-1,1,3,3,5,5-hexaphenyltetrasiloxane (11)

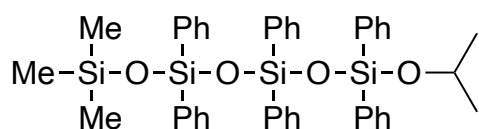

5-Isopropoxy-1,1,3,3,5,5-hexaphenyltrisiloxan-1-ol (982 mg, 1.5 mmol) was dissolved in  $\text{CH}_2\text{Cl}_2$  (6 mL). To the solution was added  $\text{Et}_3\text{N}$  (553  $\mu\text{L}$ , 3.0 mmol) and  $\text{Me}_3\text{SiCl}$  (381  $\mu\text{L}$ , 3.0 mmol) at room temperature and then the mixture was stirred overnight. The reaction mixture was passed through a short alumina pad (eluent: *n*-hexane). The crude product was passed through a short silica-gel pad (eluent: *n*-hexane/ $\text{CH}_2\text{Cl}_2 = 5:1$ ) to give 1-isopropoxy-7,7,7-trimethyl-1,1,3,3,5,5-hexaphenyltetrasiloxane (11) (1.09 g, >95%) as a colorless oil.

$^1\text{H}$  NMR (600 MHz,  $\text{CDCl}_3$ ):  $\delta$  7.56-7.49 (m, 8H), 7.49-7.44 (m, 4H), 7.37-7.29 (m, 6H), 7.26-7.16 (m, 12H), 4.05 (septet,  $J = 6.1$  Hz, 1H), 0.99 (d,  $J = 6.1$  Hz, 6H), -0.1 ppm (s, 9H)

$^{13}\text{C}\{^1\text{H}\}$  NMR (150 MHz,  $\text{CDCl}_3$ ):  $\delta$  135.6, 134.9, 134.7, 134.55, 134.53, 134.34, 129.9, 129.8, 129.7, 127.54, 127.51, 127.50, 65.8, 25.5, 1.7 ppm.

$^{29}\text{Si}\{^1\text{H}\}$  NMR (119 MHz,  $\text{CDCl}_3$ ):  $\delta$  10.0, -41.2, -46.6, -47.2 ppm.

HRMS (MALDI-TOF):  $m/z$  calcd for  $[\text{C}_{42}\text{H}_{46}\text{O}_4\text{Si}_4\text{Na}]^+$  (M+Na): 749.24; found 749.22.

### 9-Isopropoxy-1,1,3,3-tetramethyl-5,5,7,7,9,9-hexaphenylpentasiloxan-1-ol (12)

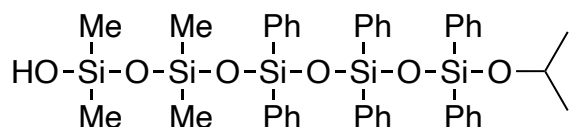

5-Isopropoxy-1,1,3,3,5,5-hexaphenyltrisiloxan-1-ol (3.93 g, 6.0 mmol) was dissolved in  $\text{CH}_2\text{Cl}_2$  (12 mL). To the solution was added  $\text{Et}_3\text{N}$  (1.7 mL, 12 mmol) and then  $\text{Me}_2\text{HSiCl}$  (1.3 mL 12 mmol) with stirring at room temperature. After 1 h, the reaction mixture was



passed through a short alumina pad (eluent: *n*-hexane). The crude product was dissolved in THF (25 mL). The solution was added to a solution of 5% palladium carbon (10.8 mg, 0.0054 mmol) and H<sub>2</sub>O (0.20 g, 10.8 mmol) in THF (5 mL) with stirring at room temperature. After 30 min, the reaction mixture was passed through a short celite pad (eluent: CH<sub>2</sub>Cl<sub>2</sub>). The crude product was dissolved in CH<sub>2</sub>Cl<sub>2</sub> (20 mL). To the solution was added Et<sub>3</sub>N (1.5 mL, 10.8 mmol) and then Me<sub>2</sub>HSiCl (1.2 mL, 10.8 mmol) with stirring at room temperature. After 1 h, the reaction mixture was passed through a short alumina pad (eluent: *n*-hexane). The crude product was dissolved in THF (25 mL) again. The solution was added to a solution of 5% palladium carbon (10.8 mg, 0.0054 mmol) and H<sub>2</sub>O (0.19 g, 10.4 mmol) in THF (5 mL) with stirring at room temperature. After 30 min, the reaction mixture was passed through a short celite pad (eluent: CH<sub>2</sub>Cl<sub>2</sub>) to give 9-isopropoxy-1,1,3,3-tetramethyl-5,5,7,7,9,9-hexaphenylpentasiloxan-1-ol (**12**) (4.04 g, 84%) as a colorless oil.

<sup>1</sup>H NMR (600 MHz, CDCl<sub>3</sub>): δ 7.56-7.52 (m, 4H), 7.52-7.46 (m, 8H), 7.37-7.30 (m, 6H), 7.25-7.17 (m, 12H), 4.04 (septet, *J* = 6.1 Hz, 1H), 1.53 (s, 1H), 0.99 (d, *J* = 6.1 Hz, 6H), -0.05 (s, 6H), -0.06 ppm (s, 6H).

<sup>13</sup>C{<sup>1</sup>H} NMR (150 MHz, CDCl<sub>3</sub>): δ 135.2, 134.9, 134.7, 134.6, 134.5, 134.4, 129.94, 129.89, 129.8, 127.59, 127.56, 127.55, 65.8, 25.5, 0.9, 0.0 ppm.

<sup>29</sup>Si{<sup>1</sup>H} NMR (119 MHz, CDCl<sub>3</sub>): δ -10.9, -20.0, -41.0, -46.5, -47.5 ppm.

HRMS (MALDI-TOF): *m/z* calcd for [C<sub>43</sub>H<sub>59</sub>O<sub>6</sub>Si<sub>5</sub>Na]<sup>+</sup> (M+Na): 825.24; found 825.24.

### 7-Isopropoxy-1,1,3,3,5,5,7,7-octaphenyltetrasiloxan-1-ol

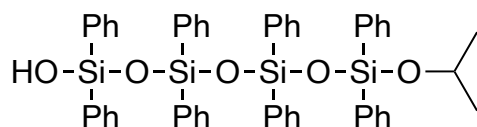

B(C<sub>6</sub>F<sub>5</sub>)<sub>3</sub> (102.4 mg, 0.10 mmol) was dissolved in toluene (40 mL). To the solution was added Ph<sub>2</sub>SiH<sub>2</sub> (1.84 mL, 10 mmol) and then acetone (370 μL, 5.0 mmol) over 5 min at room temperature. After 10 min, acetone (737 μL, 10 mmol) was added. After 1 h, Ph<sub>2</sub>SiH<sub>2</sub> (1.84 mL, 10 mmol) was added. After 1 h, acetone was added (370 μL, 5.0 mmol). After 1 h, the reaction mixture was passed through a short alumina pad (eluent: CH<sub>2</sub>Cl<sub>2</sub>). The crude product was dissolved in THF (30 mL). To the solution was added 5% palladium carbon (20 mg, 0.04 mmol) and H<sub>2</sub>O (0.36 g, 20 mmol), and the reaction mixture was refluxed. After 6 h, the reaction mixture was passed through a short celite

pad (eluent: CH<sub>2</sub>Cl<sub>2</sub>). The crude product was purified by silica-gel column chromatography (eluent: *n*-hexane/ CH<sub>2</sub>Cl<sub>2</sub> = 1:2) to give 7-isopropoxy-1,1,3,3,5,5,7,7-octaphenyltetrasiloxan-1-ol (1.24 g, 29%) as a colorless solid.

<sup>1</sup>H NMR (600 MHz, CDCl<sub>3</sub>): δ 7.50-7.41 (m, 16H), 7.36-7.28 (m, 8H), 7.21-7.12 (m, 16H), 4.02 (septet, *J* = 6.1 Hz, 1H), 2.65 (br s, 1H), 0.96 ppm (d, *J* = 6.1 Hz, 6H).

<sup>13</sup>C{<sup>1</sup>H} NMR (125 MHz, CDCl<sub>3</sub>): δ 134.7, 134.62, 134.61, 134.58, 134.5, 134.4, 134.2, 129.99, 129.97, 129.93, 129.90, 127.62, 127.60, 66.1, 25.3 ppm.

<sup>29</sup>Si{<sup>1</sup>H} NMR (119 MHz, CDCl<sub>3</sub>): δ -37.6, -40.4, -45.7, -46.2 ppm.

HRMS (MALDI-TOF): *m/z* calcd for [C<sub>51</sub>H<sub>48</sub>O<sub>5</sub>Si<sub>4</sub>Na]<sup>+</sup> (M+Na): 875.25; found 875.24.

### 1-Isopropoxy-9,9,9-trimethyl-1,1,3,3,5,5,7,7-octaphenylpentasiloxane (14)

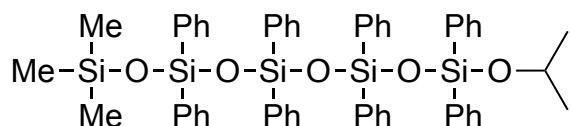

7-Isopropoxy-1,1,3,3,5,5,7,7-octaphenyltetrasiloxan-1-ol (1.24 g, 1.45 mmol) was dissolved in CH<sub>2</sub>Cl<sub>2</sub> (6.0 mL). To the solution was added Et<sub>3</sub>N (553 μL, 3.0 mmol) and Me<sub>3</sub>SiCl (381 μL, 3.0 mmol) at room temperature and then the mixture was stirred overnight. The reaction mixture was passed through a short alumina pad (eluent: CH<sub>2</sub>Cl<sub>2</sub>). The crude product was passed through a short silica-gel pad (eluent: *n*-hexane/CH<sub>2</sub>Cl<sub>2</sub> = 5:1) to give 1-isopropoxy-9,9,9-trimethyl-1,1,3,3,5,5,7,7-octaphenylpentasiloxane (**14**) (1.34 g, >95%) as a colorless oil.

<sup>1</sup>H NMR (600 MHz, CDCl<sub>3</sub>): δ 7.48-7.44 (m, 4H), 7.44-7.37 (m, 12H), 7.34-7.26 (m, 8H), 7.19-7.06 (m, 16H), 3.99 (septet, *J* = 6.1 Hz, 1H), 0.93 (d, *J* = 6.1 Hz, 6H), -0.11 ppm (s, 9H).

<sup>13</sup>C{<sup>1</sup>H} NMR (125 MHz, CDCl<sub>3</sub>): δ 135.6, 134.73, 134.72, 134.69, 134.59, 134.57, 134.5, 134.3, 129.78, 129.75, 129.6, 127.53, 127.49, 127.47, 127.4, 65.8, 25.4, 1.7 ppm.

<sup>29</sup>Si{<sup>1</sup>H} NMR (119 MHz, CDCl<sub>3</sub>): δ 9.9, -41.2, -46.45, -46.53, -47.3 ppm.

HRMS (MALDI-TOF): *m/z* calcd for [C<sub>54</sub>H<sub>56</sub>O<sub>5</sub>Si<sub>5</sub>Na]<sup>+</sup> (M+Na): 947.30; found 947.29.

**13-Isopropoxy-1,1,3,3,5,5-hexamethyl-7,7,9,9,11,11,13,13-octaphenylheptasiloxan-1-ol (15)**

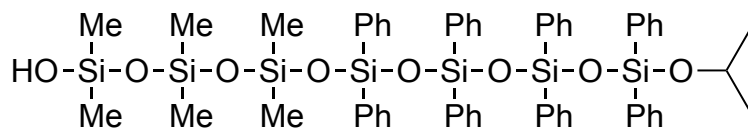

7-Isopropoxy-1,1,3,3,5,5,7,7-octaphenyltetrasiloxan-1-ol (6.49 g, 7.61 mmol) was dissolved in CH<sub>2</sub>Cl<sub>2</sub> (30 mL). To the solution was added Et<sub>3</sub>N (1.7 mL, 7.61 mmol) and Me<sub>2</sub>HSiCl (1.3 mL, 12 mmol) with stirring at room temperature. After 1 h, the reaction mixture was passed through a short alumina pad (eluent: *n*-hexane). The crude product was dissolved in THF (25 mL) again. The solution was added to a solution of 5% palladium carbon (15 mg, 0.0076 mmol), H<sub>2</sub>O (0.27 g, 15.2 mmol) in THF (5 mL) with stirring at room temperature. After 30 min, the reaction mixture was passed through a short celite pad (eluent: CH<sub>2</sub>Cl<sub>2</sub>). The crude product was dissolved in CH<sub>2</sub>Cl<sub>2</sub> (20 mL). To the solution was added Et<sub>3</sub>N (1.7 mL, 7.61 mmol) and then Me<sub>2</sub>HSiCl (1.3 mL, 12 mmol) with stirring at room temperature. After 1 h, the reaction mixture was passed through a short alumina pad (eluent: *n*-hexane). The crude product was dissolved in THF (25 mL) again. The solution was added to a solution of 5% palladium carbon (15 mg, 0.0076 mmol), H<sub>2</sub>O (0.27 g, 15.2 mmol) in THF (5 mL) with stirring at room temperature. After 30 min, the reaction mixture was passed through a short celite pad (eluent: CH<sub>2</sub>Cl<sub>2</sub>). The crude product was dissolved in CH<sub>2</sub>Cl<sub>2</sub> (30 mL). To the solution was added Et<sub>3</sub>N (1.7 mL, 7.61 mmol) and then Me<sub>2</sub>HSiCl (1.3 mL, 12 mmol) with stirring at room temperature. After 1 h, the reaction mixture was passed through a short alumina pad (eluent: *n*-hexane). The crude product was dissolved in THF (25 mL) again. The solution was added to a solution of 5% palladium carbon (15 mg, 0.0076 mmol), H<sub>2</sub>O (0.27 g, 15.2 mmol) in THF (5 mL) with stirring at room temperature. After 30 min, the reaction mixture was passed through a short celite pad (eluent: CH<sub>2</sub>Cl<sub>2</sub>) to give 13-isopropoxy-1,1,3,3,5,5-hexamethyl-7,7,9,9,11,11,13,13-octaphenylheptasiloxan-1-ol (**15**) (7.59 g, 93%) as a colorless oil.

<sup>1</sup>H NMR (600 MHz, CDCl<sub>3</sub>): δ 7.50-7.36 (m, 16H), 7.33-7.25 (m, 8H), 7.17-7.06 (m, 16H), 3.99 (sept, *J* = 6.1 Hz, 1H), 1.82 (s, 1H), 0.93 (d, *J* = 6.1 Hz, 6H), 0.04 (s, 6H), -0.07 (s, 6H), -0.13 ppm (s, 6H).

$^{13}\text{C}\{^1\text{H}\}$  NMR (125 MHz,  $\text{CDCl}_3$ ):  $\delta$  135.2, 134.70, 134.65, 134.56, 134.55, 134.46, 134.4, 129.79, 129.77, 129.76, 129.7, 127.5, 127.49, 127.47, 127.4, 65.8, 25.4, 0.91, 0.85, 0.23 ppm.

$^{29}\text{Si}\{^1\text{H}\}$  NMR (119 MHz,  $\text{CDCl}_3$ ):  $\delta$  -10.7, -20.5, -21.0, -41.2, -46.4, -46.49, -47.5 ppm.  
HRMS (MALDI-TOF):  $m/z$  calcd for  $[\text{C}_{57}\text{H}_{66}\text{O}_8\text{Si}_7\text{Na}]^+$  (M+Na): 1097.30; found 1097.34.

## Preparation of 26-mer 1, 7, 10, and 13

**1,1,1,3,3,7,7,11,11,15,15,19,19,23,23,27,27,31,31,35,35,39,39,43,43,47,47,51,51,51-Triacontamethyl-5,5,9,9,13,13,17,17,21,21,25,25,29,29,33,33,37,37,41,41,45,45,49,49-tetracosaphenylhexacosasiloxane (1)**

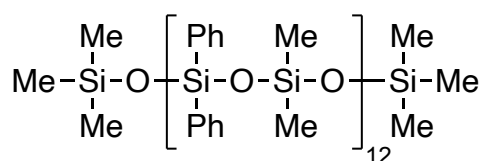

B(C<sub>6</sub>F<sub>5</sub>)<sub>3</sub> (25.6 mg, 0.05 mmol) and 1-isopropoxy-3,3,7,7,11,11-heptamethyl-1,1,5,5,9,9-hexaphenylhexasiloxane (**3**) (875 mg, 1.0 mmol) was dissolved in toluene (4.0 mL). To the solution was added <sup>1</sup>HMD<sub>2</sub>M<sup>H</sup> (328 μL, 1.0 mmol) with stirring at room temperature. After 20 min, 9-isopropoxy-3,3,7,7-tetramethyl-1,1,5,5,9,9-hexaphenylpentasiloxane-1-ol (**2**) (803 mg, 1.0 mmol) in toluene (2 mL) was added. After 20 min, <sup>1</sup>HMD<sub>2</sub>M<sup>H</sup> (328 μL, 1.0 mmol) was added. After 20 min, **2** (803 mg, 1.0 mmol) in toluene (2 mL) was added. After 20 min, <sup>1</sup>HMD<sub>2</sub>M<sup>H</sup> (328 μL, 1.0 mmol) was added. After 20 min, **2** (803 mg, 1.0 mmol) in toluene (2 mL) was added. After 20 min, <sup>1</sup>HMD<sub>2</sub>M<sup>H</sup> (328 μL, 1.0 mmol) was added. After 20 min, trimethylsilanol (104 μL, 1.0 mmol) was added. After 20 min, the reaction mixture was purified by silica-gel column chromatography (eluent: *n*-hexane:CH<sub>2</sub>Cl<sub>2</sub> = 2:1), and then further purified by GPC (eluent: *n*-hexane) to give 1,1,1,3,3,7,7,11,11,15,15,19,19,23,23,27,27,31,31,35,35,39,39,43,43,47,47,51,51,51-triacontamethyl-5,5,9,9,13,13,17,17,21,21,25,25,29,29,33,33,37,37,41,41,45,45,49,49-tetracosaphenylhexacosasiloxane (**1**) (1.83 g, 53%) as a colorless solid.

<sup>1</sup>H NMR (600 MHz, CDCl<sub>3</sub>): δ 7.58-7.43 (m, 48H), 7.36-7.27 (m, 24H), 7.27-7.23 (m, 8H), 7.20-7.09 (m, 40H), 0.05 (s, 9H), 0.03 (s, 6H), 0.023 (s, 6H), 0.015 (s, 6H), 0.003 (s, 9H), -0.01 (s, 6H), -0.02 (s, 6H), -0.019--0.049 ppm (m, 42H).

<sup>13</sup>C{<sup>1</sup>H} NMR (150 MHz, CDCl<sub>3</sub>): δ 136.1, 135.9, 135.6, 135.53, 135.52, 134.3, 134.24, 134.18, 129.7, 127.60, 127.55, 127.5, 1.9, 1.7, 1.31, 1.27, 1.25 ppm.

<sup>29</sup>Si{<sup>1</sup>H} NMR (119 MHz, CDCl<sub>3</sub>): δ 10.0, 7.5, -19.26, -19.27, -19.28, -19.29, -19.5, -20.4, -20.8, -21.7, -47.8, -48.0, -48.06, -48.08, -48.3 ppm.

HRMS (MALDI-TOF): *m/z* calcd for [C<sub>174</sub>H<sub>210</sub>O<sub>25</sub>Si<sub>26</sub>Na]<sup>+</sup> (M+Na): 3449.91; found 3449.88.

**1,1,1,3,3,5,5,11,11,13,13,19,19,21,21,27,27,29,29,35,35,37,37,43,43,45,45,51,51,51-  
Triacontamethyl-  
7,7,9,9,15,15,17,17,23,23,25,25,31,31,33,33,39,39,41,41,47,47,49,49-  
tetracosaphenylhexacosasiloxane (7)**

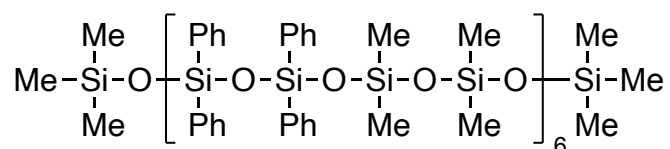

$\text{B}(\text{C}_6\text{F}_5)_3$  (25.6 mg, 0.05 mmol) and 1-isopropoxy-5,5,5-trimethyl-1,1,3,3-tetraphenyltrisiloxane (**8**) (529 mg, 1.0 mmol) was dissolved in toluene (4.0 mL). To the solution was added  $^{\text{H}}\text{MD}_2\text{M}^{\text{H}}$  (328  $\mu\text{L}$ , 1.0 mmol) with stirring at room temperature. After 20 min, 5-isopropoxy-1,1-dimethyl-3,3,5,5-tetraphenyltrisiloxane-1-ol (**9**) (803 mg, 1.0 mmol) in toluene (2 mL) was added. After 20 min,  $^{\text{H}}\text{MD}_2\text{M}^{\text{H}}$  (328  $\mu\text{L}$ , 1.0 mmol) was added. After 20 min, (**9**) (803 mg, 1.0 mmol) in toluene (2 mL) was added. After 20 min,  $^{\text{H}}\text{MD}_2\text{M}^{\text{H}}$  (328  $\mu\text{L}$ , 1.0 mmol) was added. After 20 min, (**9**) (803 mg, 1.0 mmol) in toluene (2 mL) was added. After 20 min,  $^{\text{H}}\text{MD}_2\text{M}^{\text{H}}$  (328  $\mu\text{L}$ , 1.0 mmol) was added. After 20 min, (**9**) (803 mg, 1.0 mmol) in toluene (2 mL) was added. After 20 min,  $^{\text{H}}\text{MD}_2\text{M}^{\text{H}}$  (328  $\mu\text{L}$ , 1.0 mmol) was added. After 20 min, (**9**) (803 mg, 1.0 mmol) in toluene (2 mL) was added. After 20 min,  $^{\text{H}}\text{MD}_2\text{M}^{\text{H}}$  (328  $\mu\text{L}$ , 1.0 mmol) was added. After 20 min, acetone (73.7  $\mu\text{L}$ , 1.0 mmol) was added. After 20 min,  $^{\text{H}}\text{MD}_2\text{M}^{\text{H}}$  (328  $\mu\text{L}$ , 1.0 mmol) was added. After 20 min, trimethylsilanol (104  $\mu\text{L}$ , 1.0 mmol) was added. After 20 min, the reaction mixture was purified by silica-gel column chromatography (eluent: *n*-hexane: $\text{CH}_2\text{Cl}_2$  = 2:1), and then further purified by GPC (eluent: *n*-hexane) to give 1,1,1,3,3,5,5,11,11,13,13,19,19,21,21,27,27,29,29,35,35,37,37,43,43,45,45,51,51,51-triacontamethyl-7,7,9,9,15,15,17,17,23,23,25,25,31,31,33,33,39,39,41,41,47,47,49,49-tetracosaphenylhexacosasiloxane (**7**) (1.58 g, 46%) as a colorless oil.

$^1\text{H}$  NMR (600 MHz,  $\text{CDCl}_3$ ):  $\delta$  7.59-7.46 (m, 48H), 7.35-7.17 (m, 72H), 0.03 (s, 9H), -0.03 (s, 9H), -0.06 (s, 6H), -0.08 (s, 6H), -0.187 (s, 6H), -0.191 (s, 6H), -0.195 (s, 6H), -0.199 (s, 6H), -0.21 ppm (m, 36H).

$^{13}\text{C}\{^1\text{H}\}$  NMR (150 MHz,  $\text{CDCl}_3$ ):  $\delta$  135.8, 135.6, 135.52, 135.49, 135.4, 134.4, 134.34, 134.31, 134.28, 129.8, 127.54, 127.51, 1.8, 1.7, 1.03, 1.02, 0.9 ppm.

$^{29}\text{Si}\{^1\text{H}\}$  NMR (119 MHz,  $\text{CDCl}_3$ ):  $\delta$  10.1, 7.3, -20.40, -20.41, -20.43, -20.8, -21.2, -47.3, -47.68, -47.71, -47.73 ppm.

HRMS (MALDI-TOF):  $m/z$  calcd for  $[C_{174}H_{210}O_{25}Si_{26}Na]^+$  (M+Na): 3449.91; found 3449.92.

**1,1,1,3,3,5,5,7,7,15,15,17,17,19,19,27,27,29,29,31,31,39,39,41,41,43,43,51,51,51-  
Triacontamethyl-  
9,9,11,11,13,13,21,21,23,23,25,25,33,33,35,35,37,37,45,45,47,47,49,49-  
tetracosaphenylhexacosasiloxane (10)**

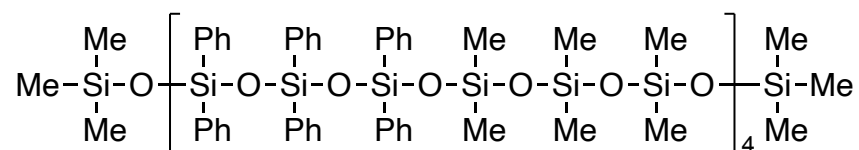

$B(C_6F_5)_3$  (25.6 mg, 0.05 mmol) and 1-isopropoxy-7,7,7-trimethyl-1,1,3,3,5,5-hexaphenyltetrasiloxane (**11**) (727 mg, 1.0 mmol) was dissolved in toluene (4.0 mL). To the solution was added  $^HMD_2M^H$  (328  $\mu$ L, 1.0 mmol) with stirring at room temperature. After 20 min, 9-isopropoxy-1,1,3,3-tetramethyl-5,5,7,7,9,9-hexaphenyltetrasiloxane-1-ol (**12**) (803 mg, 1.0 mmol) in toluene (2 mL) was added. After 20 min,  $^HMD_2M^H$  (328  $\mu$ L, 1.0 mmol) was added. After 20 min, (**12**) (803 mg, 1.0 mmol) in toluene (2 mL) was added. After 20 min,  $^HMD_2M^H$  (328  $\mu$ L, 1.0 mmol) was added. After 20 min, (**12**) (803 mg, 1.0 mmol) in toluene (2 mL) was added. After 20 min,  $^HMD_2M^H$  (328  $\mu$ L, 1.0 mmol) was added. After 20 min, 1,1,3,3,5,5,5-heptamethyltrisiloxane-1-ol (262 mg, 1.1 mmol) was added. After 20 min, the reaction mixture was purified by silica-gel column chromatography (eluent: *n*-hexane:CH<sub>2</sub>Cl<sub>2</sub> = 2:1), and then further purified by GPC (eluent: *n*-hexane) to give 1,1,1,3,3,5,5,7,7,15,15,17,17,19,19,27,27,29,29,31,31,39,39,41,41,43,43,51,51,51-triacontamethyl-

9,9,11,11,13,13,21,21,23,23,25,25,33,33,35,35,37,37,45,45,47,47,49,49-tetracosaphenylhexacosasiloxane (**10**) (1.66 g, 48%) as a colorless oil.

$^1H$  NMR (600 MHz, CDCl<sub>3</sub>):  $\delta$  7.54-7.38 (m, 48H), 7.35-7.25 (m, 24H), 7.21-7.11 (m, 48H), 0.06, (s, 9H), -0.01 (s, 6H), -0.076 (s, 6H), -0.078 (9H), -0.11 (6H), -0.17 (s, 6H), -0.176 (s, 6H), -0.177-0.19 (m, 24H), -0.226 (s, 6H), -0.227 (s, 6H), -0.23 ppm (s, 6H).

$^{13}C\{^1H\}$  NMR (150 MHz, CDCl<sub>3</sub>):  $\delta$  135.6, 135.33, 135.29, 135.28, 135.00, 134.97, 134.95, 134.52, 134.50, 134.48, 134.38, 134.35, 134.3, 129.8, 129.7, 127.50, 127.46, 1.8, 1.7, 1.1, 1.0, 0.94, 0.93 ppm.

$^{29}Si\{^1H\}$  NMR (119 MHz, CDCl<sub>3</sub>):  $\delta$  10.0, 7.3, -20.67, -20.71, -21.4, -21.6, -21.9, -

46.5, -46.6, -47.2, -47.59, -47.60, -47.61 ppm.

HRMS (MALDI-TOF):  $m/z$  calcd for  $[C_{174}H_{210}O_{25}Si_{26}Na]^+$  (M+Na): 3449.91; found 3449.89.

**1,1,1,3,3,5,5,7,7,9,9,19,19,21,21,23,23,25,25,35,35,37,37,39,39,41,41,51,51,51-  
Triacontamethyl-  
11,11,13,13,15,15,17,17,27,27,29,29,31,31,33,33,43,43,45,45,47,47,49,49-  
tetracosaphenylhexacosasiloxane (13)**

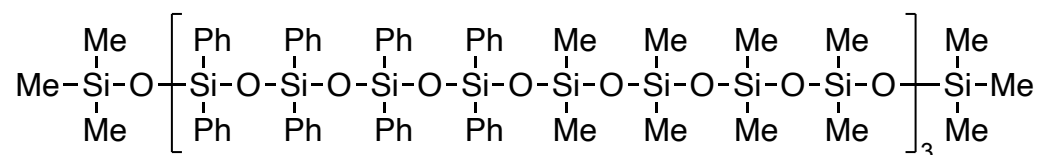

$B(C_6F_5)_3$  (25.6 mg, 0.05 mmol) and 1-isopropoxy-7,7,7-trimethyl-1,1,3,3,5,5-hexaphenyltetrasiloxane (**14**) (727 mg, 1.0 mmol) was dissolved in toluene (4.0 mL). To the solution was added  $^HMD_2M^H$  (328  $\mu$ L, 1.0 mmol) with stirring at room temperature. After 20 min, 9-isopropoxy-1,1,3,3-tetramethyl-5,5,7,7,9,9-hexaphenyltetrasiloxane-1-ol (**15**) (803 mg, 1.0 mmol) in toluene (2 mL) was added. After 20 min,  $^HMD_2M^H$  (328  $\mu$ L, 1.0 mmol) was added. After 20 min, (**15**) (803 mg, 1.0 mmol) in toluene (2 mL) was added. After 20 min,  $^HMD_2M^H$  (328  $\mu$ L, 1.0 mmol) was added. After 20 min, 1,1,3,3,5,5,7,7,7-nonamethyltetrasiloxane-1-ol (344 mg, 1.1 mmol) was added. After 20 min, the reaction mixture was purified by silica-gel column chromatography (eluent: *n*-hexane:CH<sub>2</sub>Cl<sub>2</sub> = 2:1), and then further purified by GPC (eluent: *n*-hexane) to give 1,1,1,3,3,5,5,7,7,9,9,19,19,21,21,23,23,25,25,35,35,37,37,39,39,41,41,51,51,51-triacontamethyl-

11,11,13,13,15,15,17,17,27,27,29,29,31,31,33,33,43,43,45,45,47,47,49,49-tetracosaphenylhexacosasiloxane (**13**) (1.99 g, 58%) as a colorless oil.

$^1H$  NMR (600 MHz, CDCl<sub>3</sub>):  $\delta$  7.45-7.35 (m, 48H), 7.31-7.23 (m, 24H), 7.16-7.04 (m, 48H), 0.07 (s, 9H), 0.02 (s, 6H), 0.01 (s, 6H), -0.08 (s, 6H), -0.11 (s, 9H), -0.14 (s, 6H), -0.16 (m, 24H), -0.18 ppm (m, 24H).

$^{13}C\{^1H\}$  NMR (150 MHz, CDCl<sub>3</sub>):  $\delta$  135.6, 135.28, 135.25, 134.8, 134.74, 134.72, 134.6, 134.54, 134.52, 134.52, 134.46, 134.37, 134.35, 134.3, 129.7, 129.6, 127.5, 127.43, 127.41, 1.8, 1.7, 1.1, 1.0, 0.93, 0.91 ppm.

$^{29}Si\{^1H\}$  NMR (119 MHz, CDCl<sub>3</sub>):  $\delta$  9.9, 7.3, -20.67, -20.70, -21.4, -21.79, -21.82, -21.83, -21.84, -22.1, -46.39, -46.41, -46.44, -47.3, -47.6 ppm.



HRMS (MALDI-TOF):  $m/z$  calcd for  $[\text{C}_{174}\text{H}_{210}\text{O}_{25}\text{Si}_{26}\text{Na}]^+$  (M+Na): 3449.91; found 3449.89.

Figure S1. 9-Isopropoxy-3,3,7,7-tetramethyl-1,1,5,5,9,9-hexaphenylpentasiloxane-1-ol (2)  
1H NMR

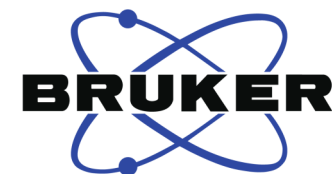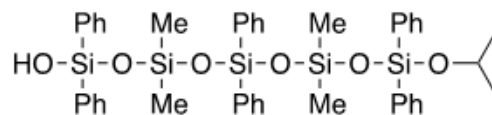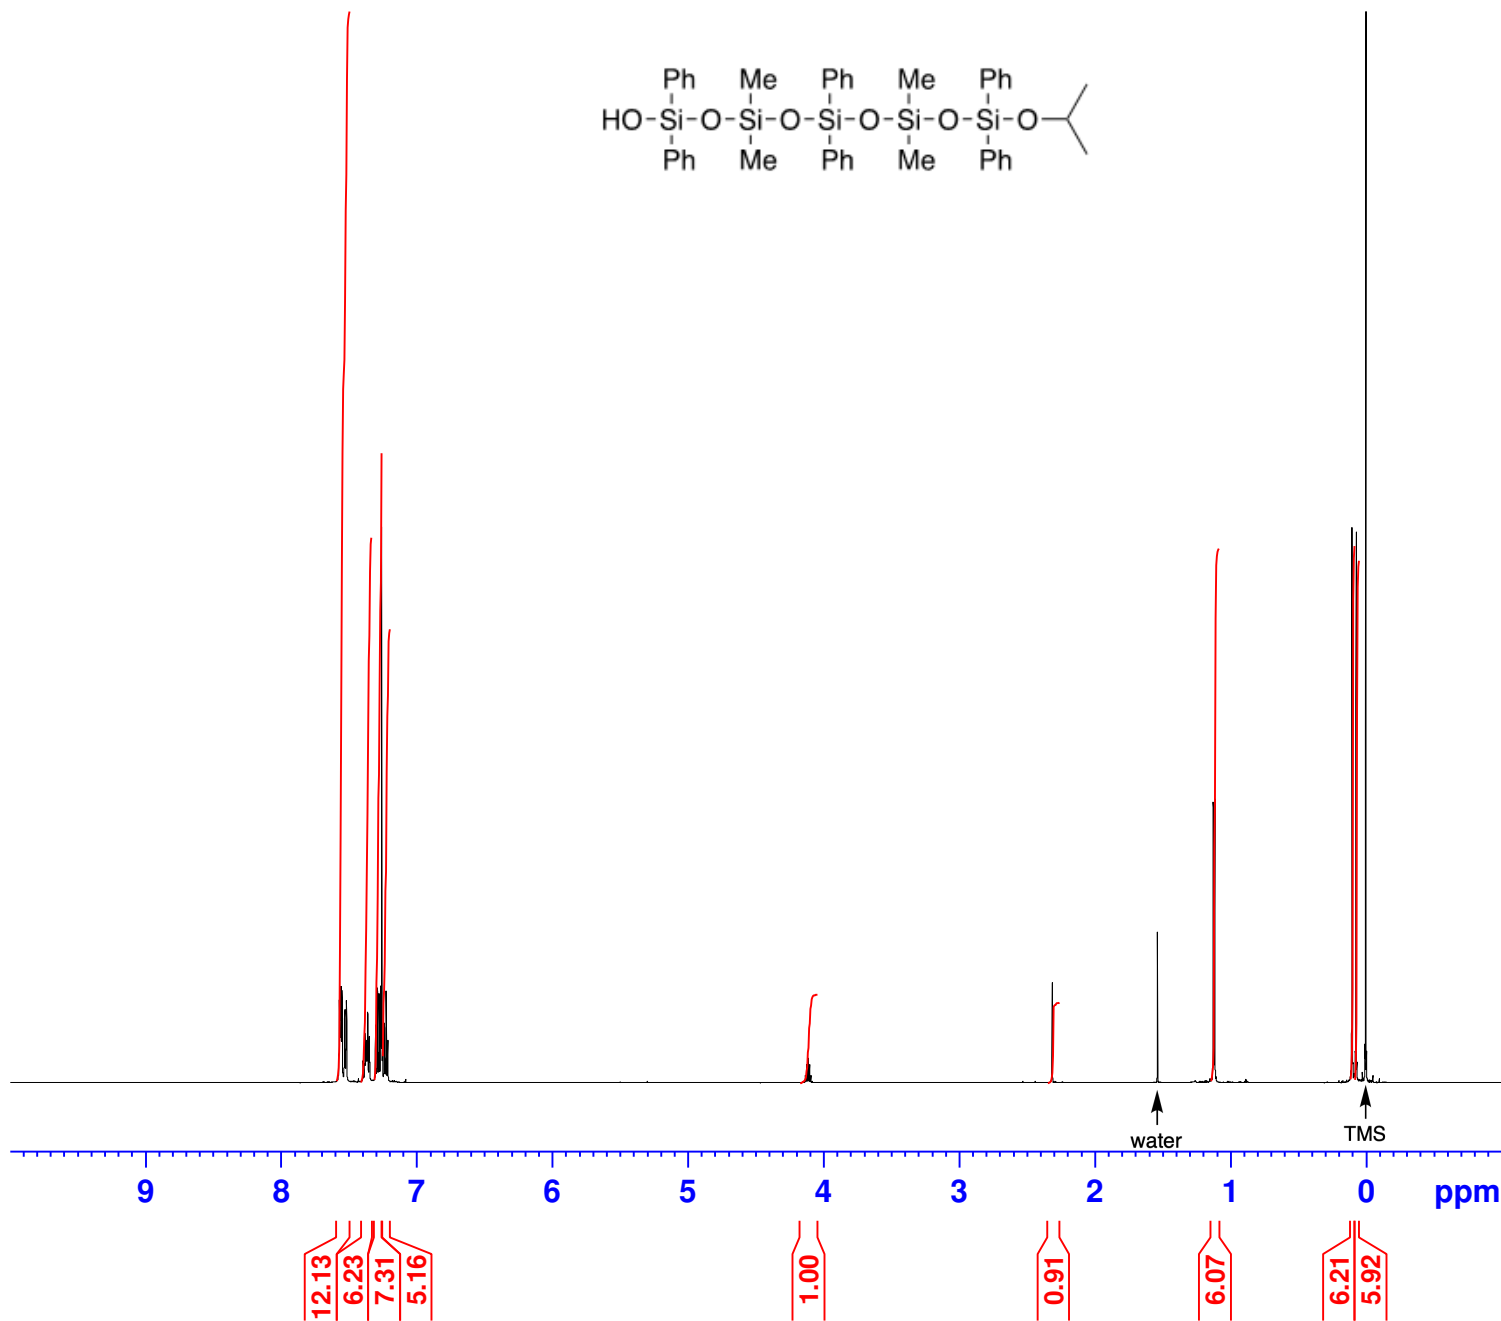

Current Data Parameters  
NAME kawatsu-1189-(BB-a)  
EXPNO 10  
PROCNO 1

F2 - Acquisition Parameters  
Date\_ 20210608  
Time 13.07  
INSTRUM spect  
PROBHD 5 mm CP2 BB-1H  
PULPROG zg30  
TD 65536  
SOLVENT CDCl3  
NS 8  
DS 2  
SWH 12019.230 Hz  
FIDRES 0.183399 Hz  
AQ 2.7262976 sec  
RG 28.5  
DW 41.600 usec  
DE 15.65 usec  
TE 298.1 K  
D1 1.00000000 sec  
TD0 1

==== CHANNEL f1 =====  
SFO1 600.1330006 MHz  
NUC1 1H  
P1 12.00 usec  
PLW1 15.00000000 W

F2 - Processing parameters  
SI 65536  
SF 600.1300154 MHz  
WDW EM  
SSB 0  
LB 0.20 Hz  
GB 0  
PC 1.00

Figure S2. 9-Isopropoxy-3,3,7,7-tetramethyl-1,1,5,9,9-hexaphenylpentasiloxane-1-ol (2)  
<sup>13</sup>C NMR



Current Data Parameters  
 NAME kawatsu-1189-(BB-a)  
 EXPNO 11  
 PROCNO 1

F2 - Acquisition Parameters  
 Date\_ 20210419  
 Time 22.09  
 INSTRUM spect  
 PROBHD 5 mm CPBBO BB-  
 PULPROG zgpg30  
 TD 65536  
 SOLVENT CDCl3  
 NS 64  
 DS 2  
 SWH 33333.332 Hz  
 FIDRES 0.508626 Hz  
 AQ 0.9830400 sec  
 RG 193.87  
 DW 15.000 usec  
 DE 19.62 usec  
 TE 298.0 K  
 D1 2.00000000 sec  
 D11 0.03000000 sec  
 TD0 1

==== CHANNEL f1 =====  
 SFO1 150.9430468 MHz  
 NUC1 13C  
 P1 10.00 usec  
 PLW1 35.00000000 W

==== CHANNEL f2 =====  
 SFO2 600.2324009 MHz  
 NUC2 1H  
 CPDPRG[2] waltz65  
 PCPD2 70.00 usec  
 PLW2 15.50000000 W  
 PLW12 0.45550999 W  
 PLW13 0.22875001 W

F2 - Processing parameters  
 SI 65536  
 SF 150.9279618 MHz  
 WDW EM  
 SSB 0  
 LB 1.00 Hz  
 GB 0  
 PC 1.40

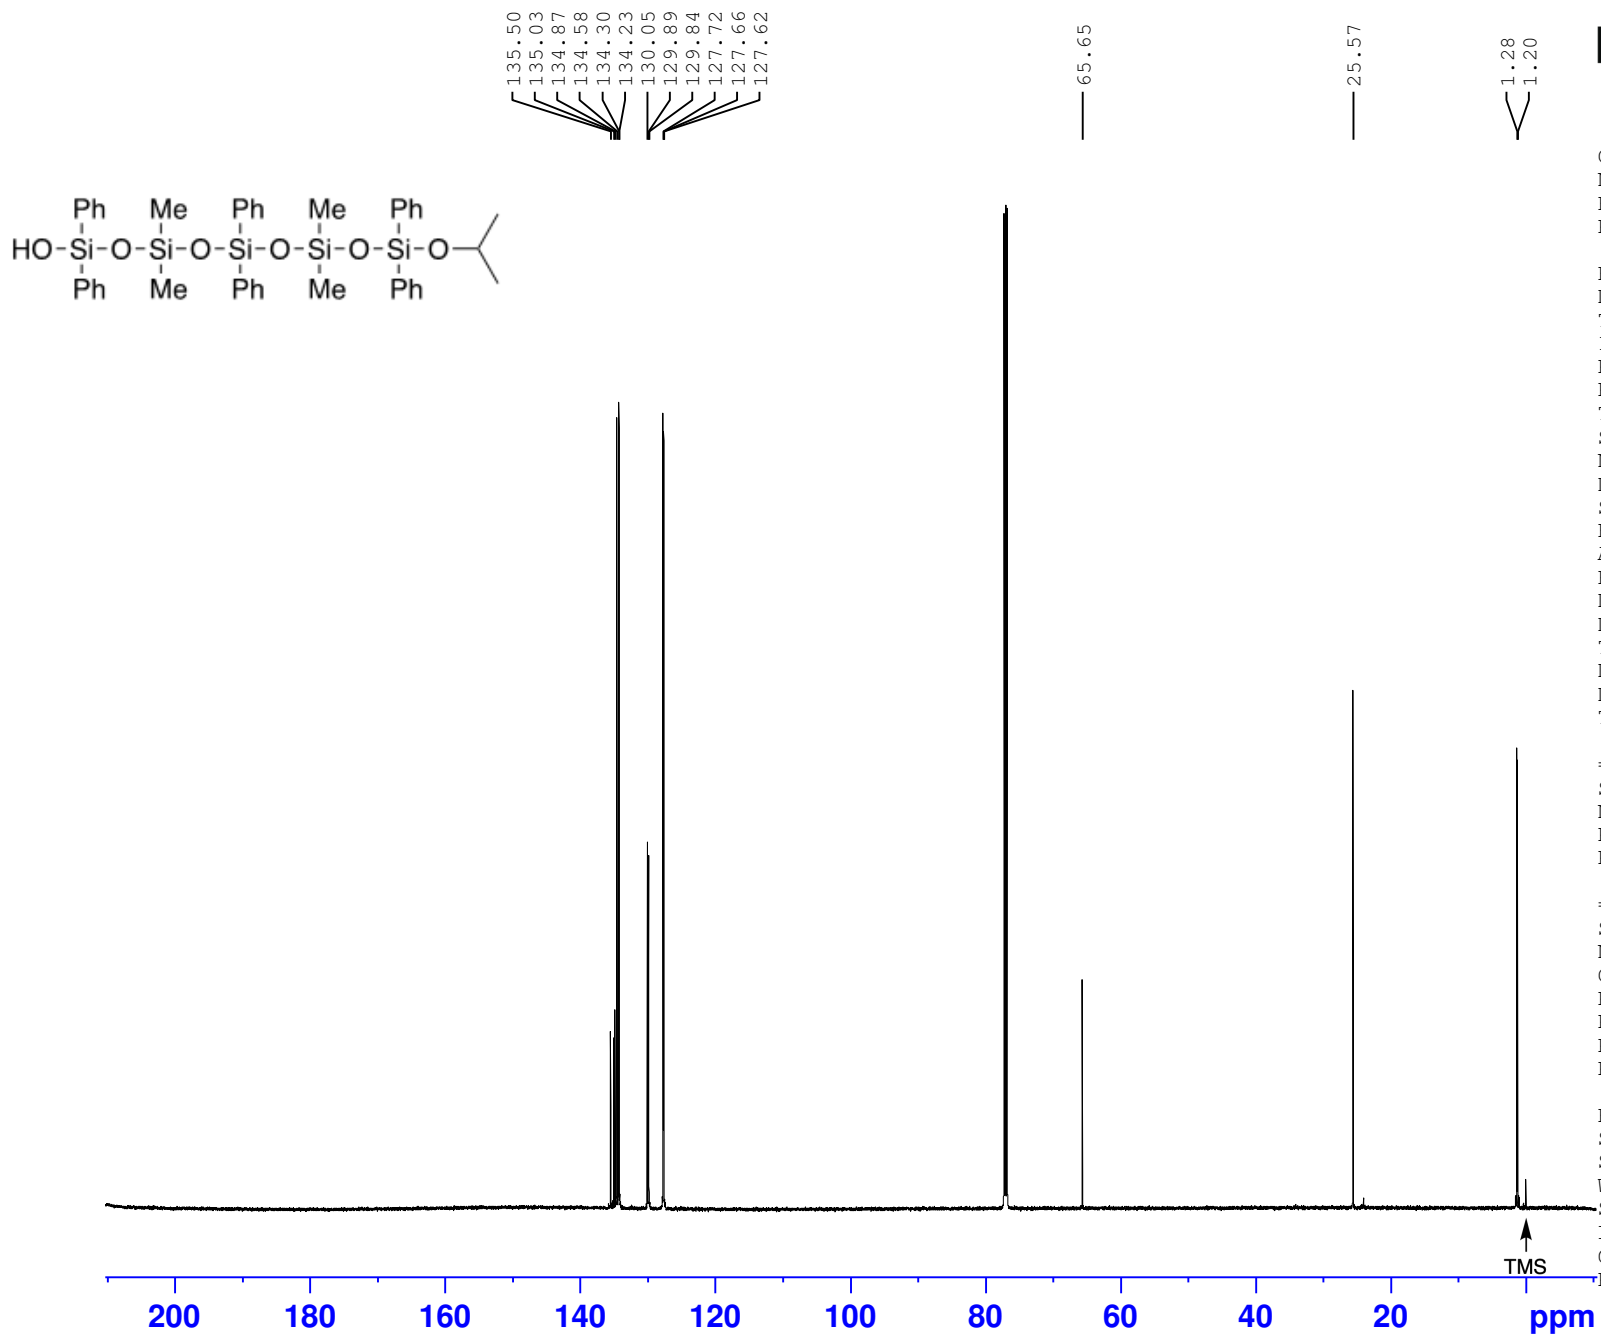

Figure S3. 9-Isopropoxy-3,3,7,7-tetramethyl-1,1,5,5,9,9-hexaphenylpentasiloxane-1-ol (2)  
<sup>29</sup>Si NMR

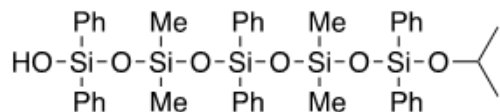

-18.26  
 -19.10  
 -38.32  
 -41.71  
 -47.97

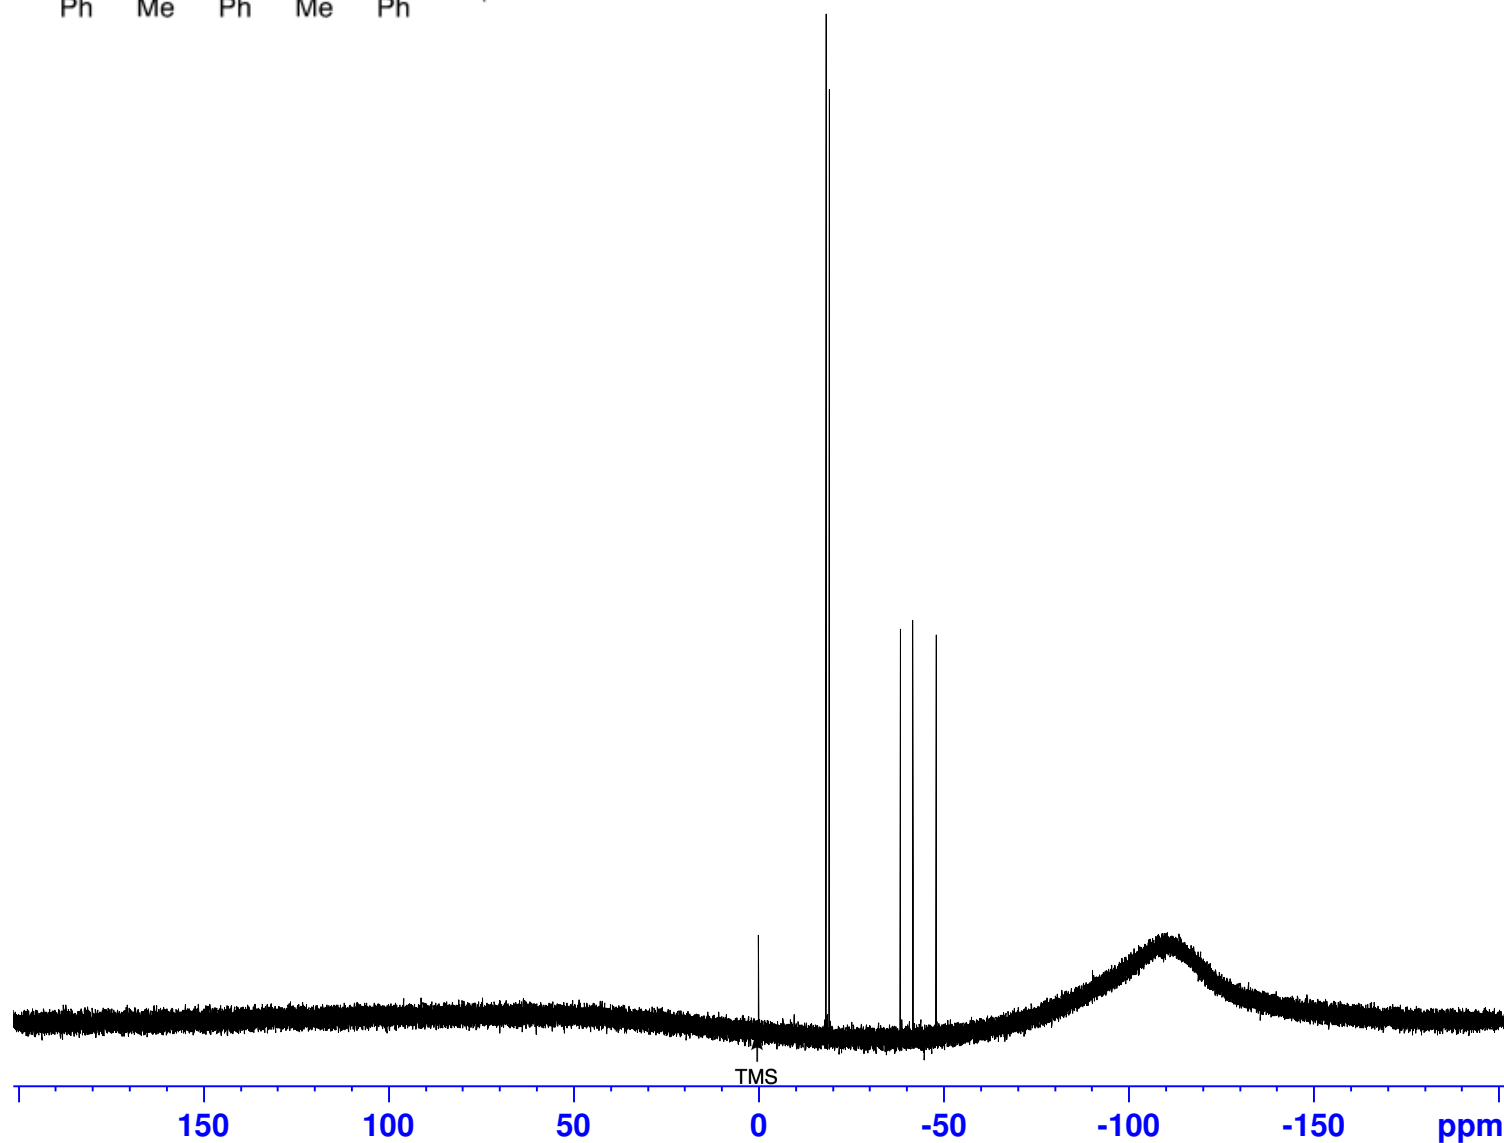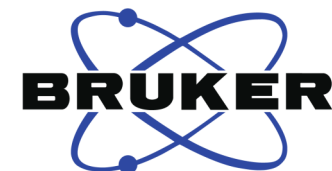

Current Data Parameters  
 NAME kawatsu-1189-(BB-a)  
 EXPNO 12  
 PROCNO 1

F2 - Acquisition Parameters  
 Date\_ 20210419  
 Time 23.00  
 INSTRUM spect  
 PROBHD 5 mm CPBBO BB-  
 PULPROG zgig30  
 TD 131072  
 SOLVENT CDC13  
 NS 256  
 DS 2  
 SWH 48076.922 Hz  
 FIDRES 0.366798 Hz  
 AQ 1.3631488 sec  
 RG 193.87  
 DW 10.400 usec  
 DE 18.90 usec  
 TE 298.0 K  
 D1 10.00000000 sec  
 D11 0.03000000 sec  
 TD0 1

==== CHANNEL f1 =====  
 SFO1 119.2488170 MHz  
 NUC1 29Si  
 P1 12.00 usec  
 PLW1 44.50000000 W

==== CHANNEL f2 =====  
 SFO2 600.2324009 MHz  
 NUC2 1H  
 CPDPRG[2] waltz65  
 PCPD2 70.00 usec  
 PLW2 15.50000000 W  
 PLW12 0.45550999 W

F2 - Processing parameters  
 SI 131072  
 SF 119.2488188 MHz  
 WDW EM  
 SSB 0  
 LB 0.30 Hz  
 GB 0  
 PC 1.40

Figure S4. 5-Isopropoxy-3,3,7,7,11,11,11-heptamethyl-1,1,5,5,9,9-hexaphenylhexasiloxane (3)  
1H NMR

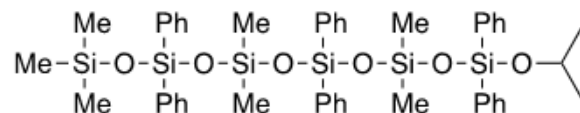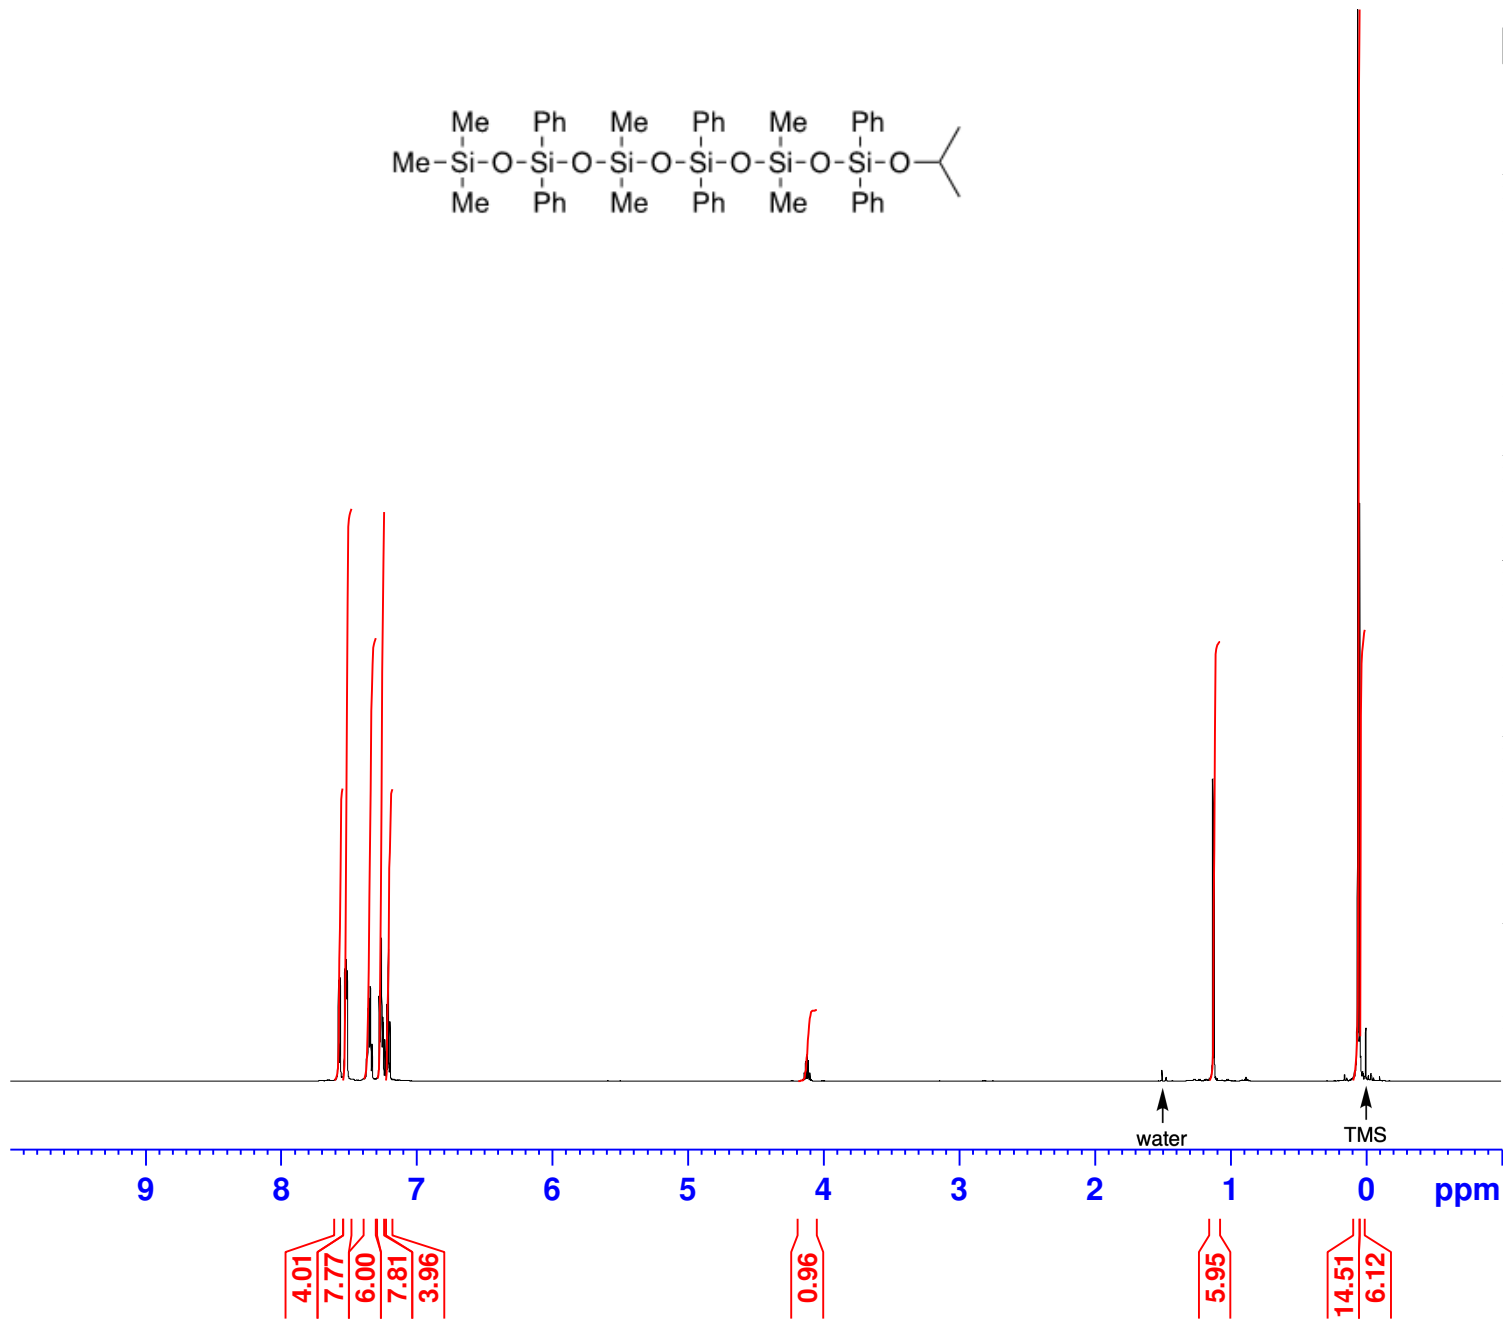

Current Data Parameters  
NAME OMR-11-data  
EXPNO 10  
PROCNO 1

F2 - Acquisition Parameters  
Date\_ 20240226  
Time 12.14 h  
INSTRUM spect  
PROBHD z136133\_0001 (  
PULPROG zg30  
TD 65536  
SOLVENT CDC13  
NS 8  
DS 2  
SWH 12019.230 Hz  
FIDRES 0.366798 Hz  
AQ 2.7262976 sec  
RG 25.4  
DW 41.600 usec  
DE 16.13 usec  
TE 298.0 K  
D1 1.00000000 sec  
TD0 1  
SFO1 600.1330006 MHz  
NUC1 1H  
P0 4.00 usec  
P1 12.00 usec  
PLW1 15.00000000 W

F2 - Processing parameters  
SI 65536  
SF 600.1300299 MHz  
WDW EM  
SSB 0  
LB 0.20 Hz  
GB 0  
PC 1.00

Figure S5. 5-Isopropoxy-3,3,7,7,11,11,11-heptamethyl-1,1,5,5,9,9-hexaphenylhexasiloxane (3)  
<sup>13</sup>C NMR

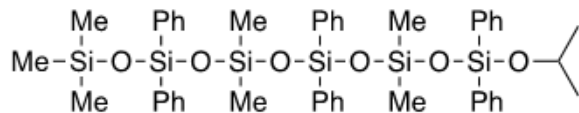

136.09  
 135.58  
 134.95  
 134.58  
 134.30  
 134.19  
 129.81  
 129.72  
 129.68  
 127.61  
 127.56

65.60

25.60

1.86  
 1.33  
 1.30

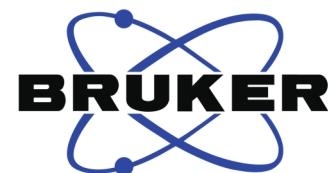

Current Data Parameters  
 NAME OMR-10-Data (precursor-a)  
 EXPNO 11  
 PROCNO 1

F2 - Acquisition Parameters  
 Date\_ 20210713  
 Time\_ 17.49 h  
 INSTRUM spect  
 PROBHD Z132572\_0019 ( )  
 PULPROG zgpg30  
 TD 65536  
 SOLVENT CDCl3  
 NS 64  
 DS 2  
 SWH 33333.332 Hz  
 FIDRES 1.017253 Hz  
 AQ 0.9830400 sec  
 RG 193.87  
 DW 15.000 usec  
 DE 18.14 usec  
 TE 298.0 K  
 D1 2.00000000 sec  
 D11 0.03000000 sec  
 TD0 1  
 SFO1 150.9430463 MHz  
 NUC1 13C  
 P0 3.33 usec  
 P1 10.00 usec  
 PLW1 34.00000000 W  
 SFO2 600.2324009 MHz  
 NUC2 1H  
 CPDPRG[2] waltz65  
 PCPD2 70.00 usec  
 PLW2 13.00000000 W  
 PLW12 0.38203999 W  
 PLW13 0.19216000 W

F2 - Processing parameters  
 SI 65536  
 SF 150.9279574 MHz  
 WDW EM  
 SSB 0  
 LB 1.00 Hz  
 GB 0  
 PC 1.40

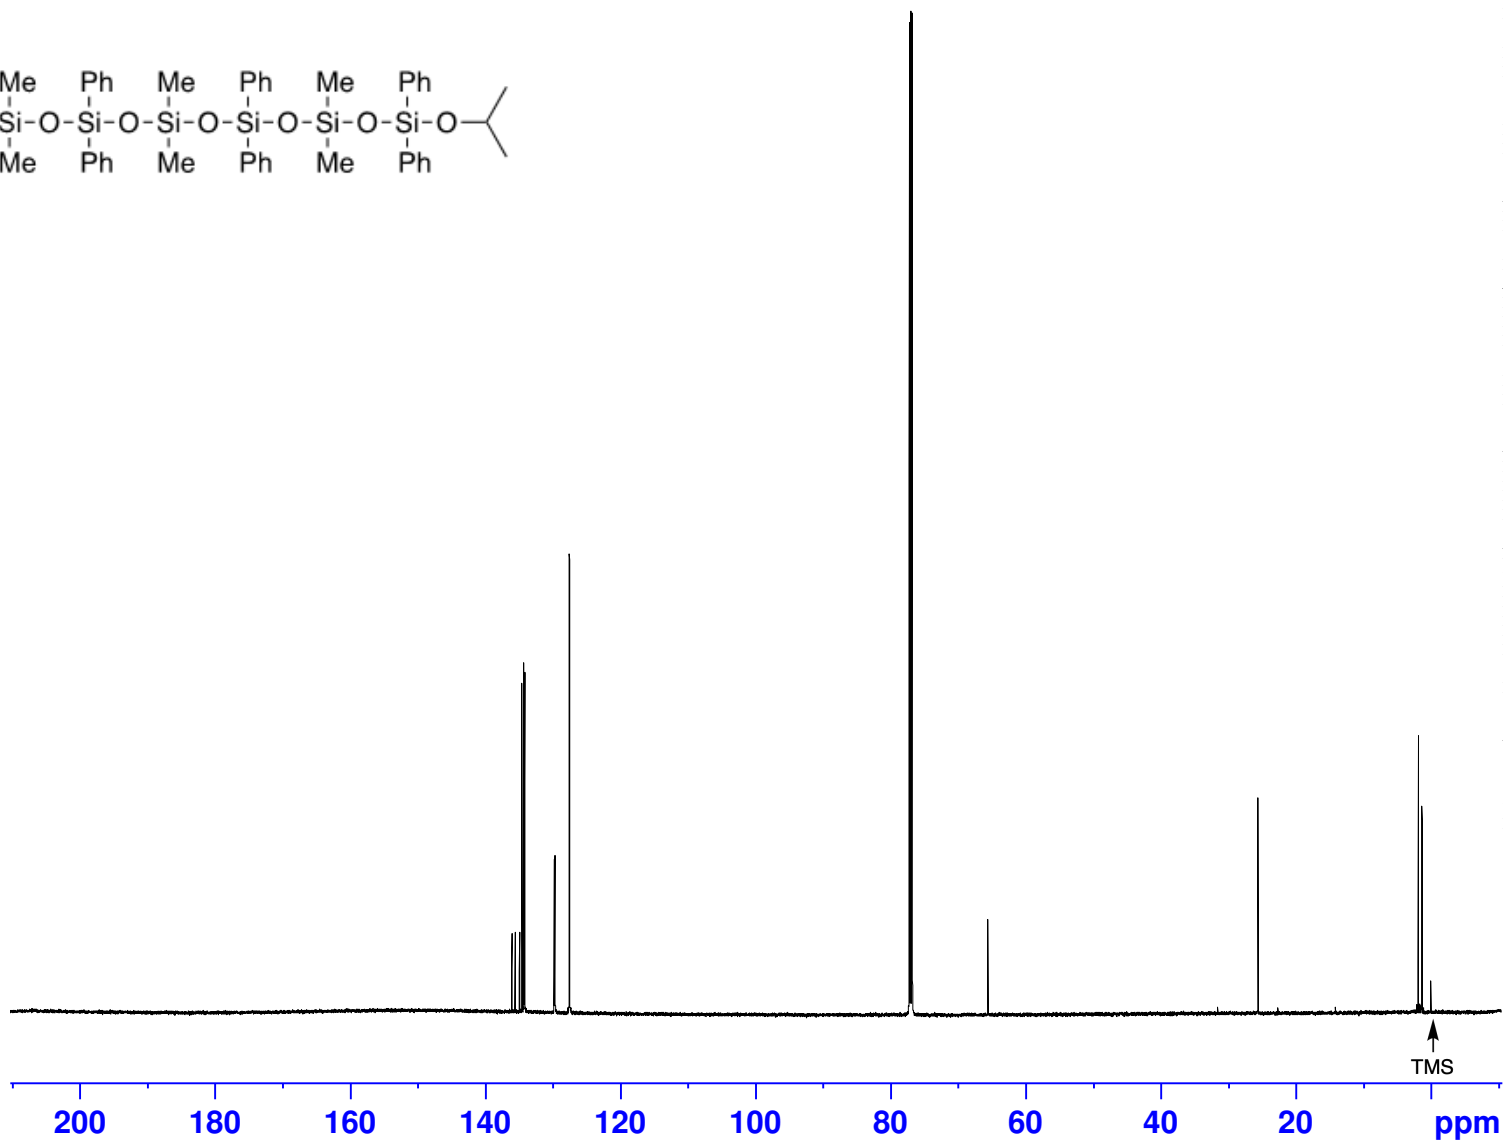

Figure S6. 5-Isopropoxy-3,3,7,7,11,11,11-heptamethyl-1,1,5,5,9,9-hexaphenylhexasiloxane (3)  
29Si NMR

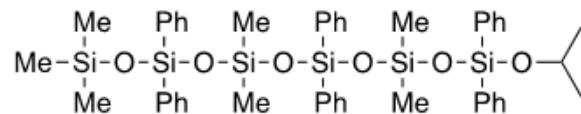

9.94  
-19.37  
-19.48  
-41.89  
-47.80  
-48.14

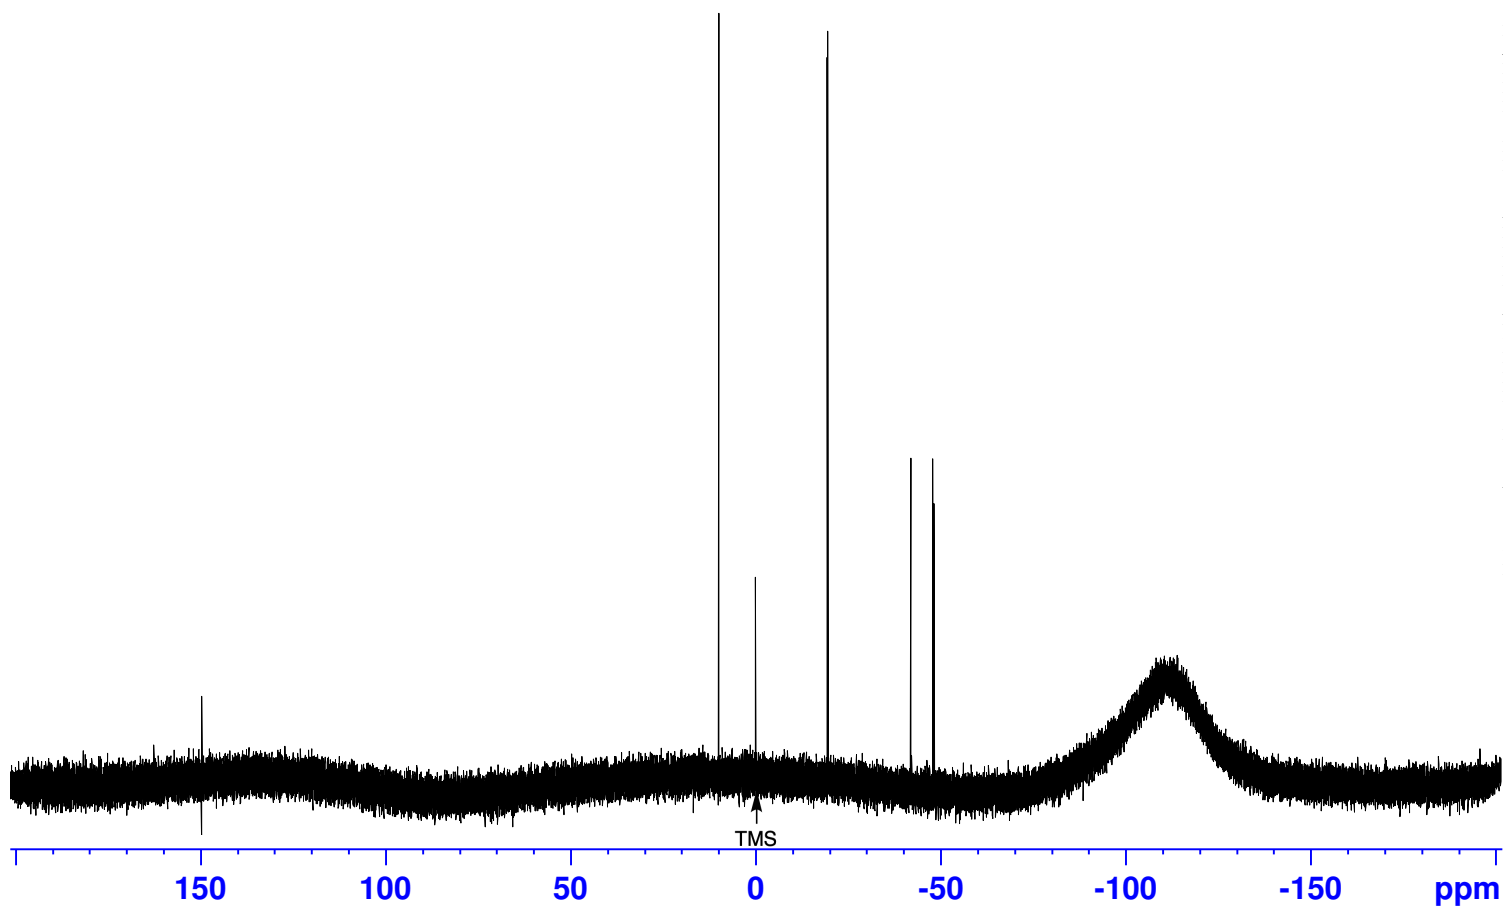

Current Data Parameters  
NAME OMR-10-Data (precursor-a)  
EXPNO 12  
PROCNO 1

F2 - Acquisition Parameters  
Date\_ 20210713  
Time 18.40 h  
INSTRUM spect  
PROBHD Z132572\_0019 (  
PULPROG zgig30  
TD 131072  
SOLVENT CDC13  
NS 256  
DS 2  
SWH 48076.922 Hz  
FIDRES 0.733596 Hz  
AQ 1.3631488 sec  
RG 193.87  
DW 10.400 usec  
DE 19.38 usec  
TE 298.0 K  
D1 10.00000000 sec  
D11 0.03000000 sec  
TD0 1  
SFO1 119.2488165 MHz  
NUC1 29Si  
P0 4.00 usec  
P1 12.00 usec  
PLW1 45.00000000 W  
SFO2 600.2324009 MHz  
NUC2 1H  
CPDPRG[2] waltz65  
PCPD2 70.00 usec  
PLW2 13.00000000 W  
PLW12 0.38203999 W

F2 - Processing parameters  
SI 131072  
SF 119.2488171 MHz  
WDW EM  
SSB 0  
LB 0.30 Hz  
GB 0  
PC 1.40

Figure S7. 3-isopropoxyisopropoxy-1,1,3,3-tetraphenyldisiloxan-1-ol  
1H NMR

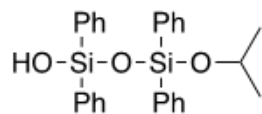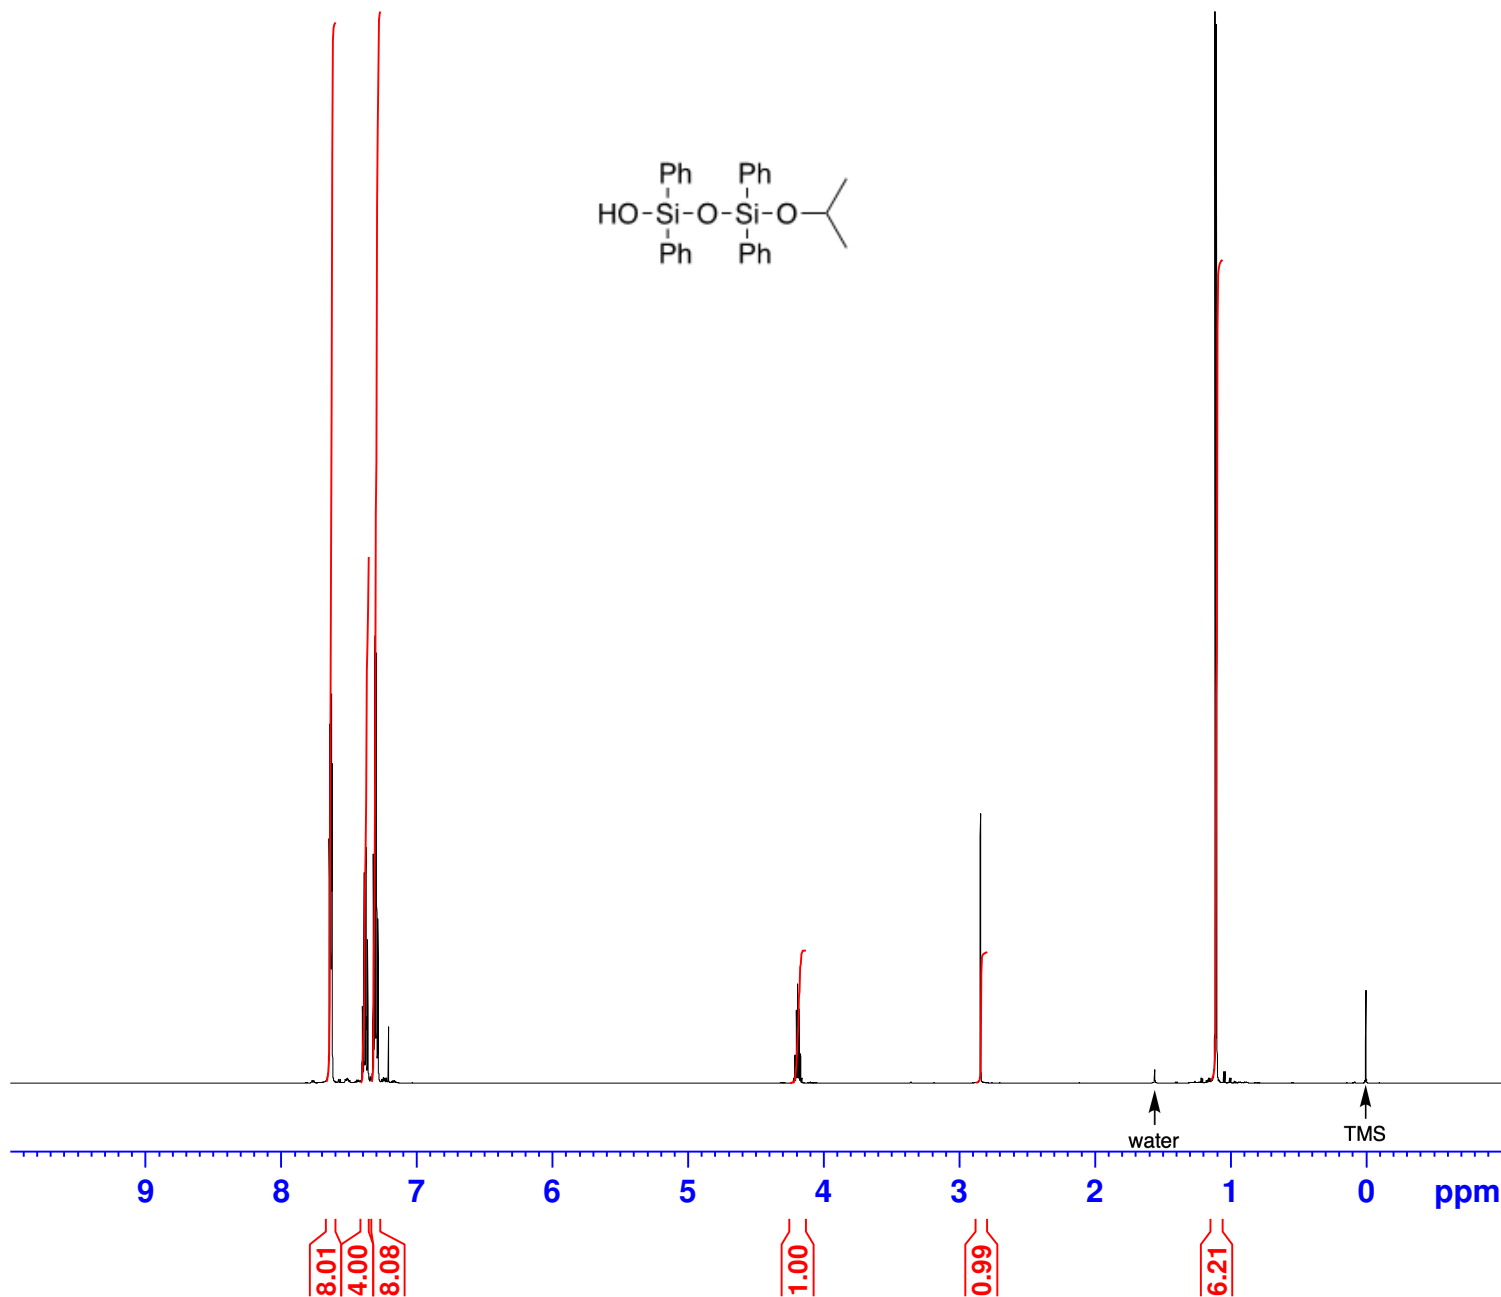

Current Data Parameters  
NAME OMR-21-data  
EXPNO 60  
PROCNO 1

F2 - Acquisition Parameters  
Date\_ 20210727  
Time 0.02 h  
INSTRUM spect  
PROBHD z136133\_0001 (  
PULPROG zg30  
TD 65536  
SOLVENT CDCl3  
NS 8  
DS 2  
SWH 12019.230 Hz  
FIDRES 0.366798 Hz  
AQ 2.7262976 sec  
RG 25.4  
DW 41.600 usec  
DE 16.13 usec  
TE 297.8 K  
D1 1.00000000 sec  
TD0 1  
SFO1 600.1330006 MHz  
NUC1 1H  
P0 4.00 usec  
P1 12.00 usec  
PLW1 15.00000000 W

F2 - Processing parameters  
SI 65536  
SF 600.1300446 MHz  
WDW EM  
SSB 0  
LB 0.20 Hz  
GB 0  
PC 1.00



Figure S8. 3-Isopropoxyisopropoxy-1,1,3,3-tetraphenyldisiloxan-1-ol  
 13C NMR

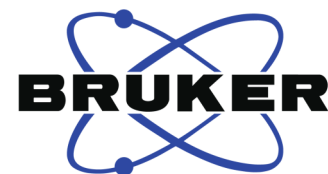

Current Data Parameters  
 NAME SBB-1  
 EXPNO 71  
 PROCNO 1

F2 - Acquisition Parameters  
 Date\_ 20240228  
 Time 11.59 h  
 INSTRUM spect  
 PROBHD z136133\_0001 (  
 PULPROG zgpg30  
 TD 65536  
 SOLVENT CDC13  
 NS 256  
 DS 2  
 SWH 33333.332 Hz  
 FIDRES 1.017253 Hz  
 AQ 0.9830400 sec  
 RG 203  
 DW 15.000 usec  
 DE 18.14 usec  
 TE 300.0 K  
 D1 2.00000000 sec  
 D11 0.03000000 sec  
 TD0 1  
 SFO1 150.9178988 MHz  
 NUC1 13C  
 P0 3.33 usec  
 P1 10.00 usec  
 PLW1 48.00000000 W  
 SFO2 600.1324005 MHz  
 NUC2 1H  
 CPDPRG[2] waltz65  
 PCPD2 70.00 usec  
 PLW2 15.00000000 W  
 PLW12 0.44082001 W  
 PLW13 0.22172999 W

F2 - Processing parameters  
 SI 65536  
 SF 150.9028150 MHz  
 WDW EM  
 SSB 0  
 LB 1.00 Hz  
 GB 0  
 PC 1.40

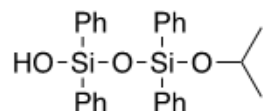

134.65  
 134.62  
 134.44  
 134.38  
 130.24  
 130.08  
 127.79  
 127.75

66.04

25.53

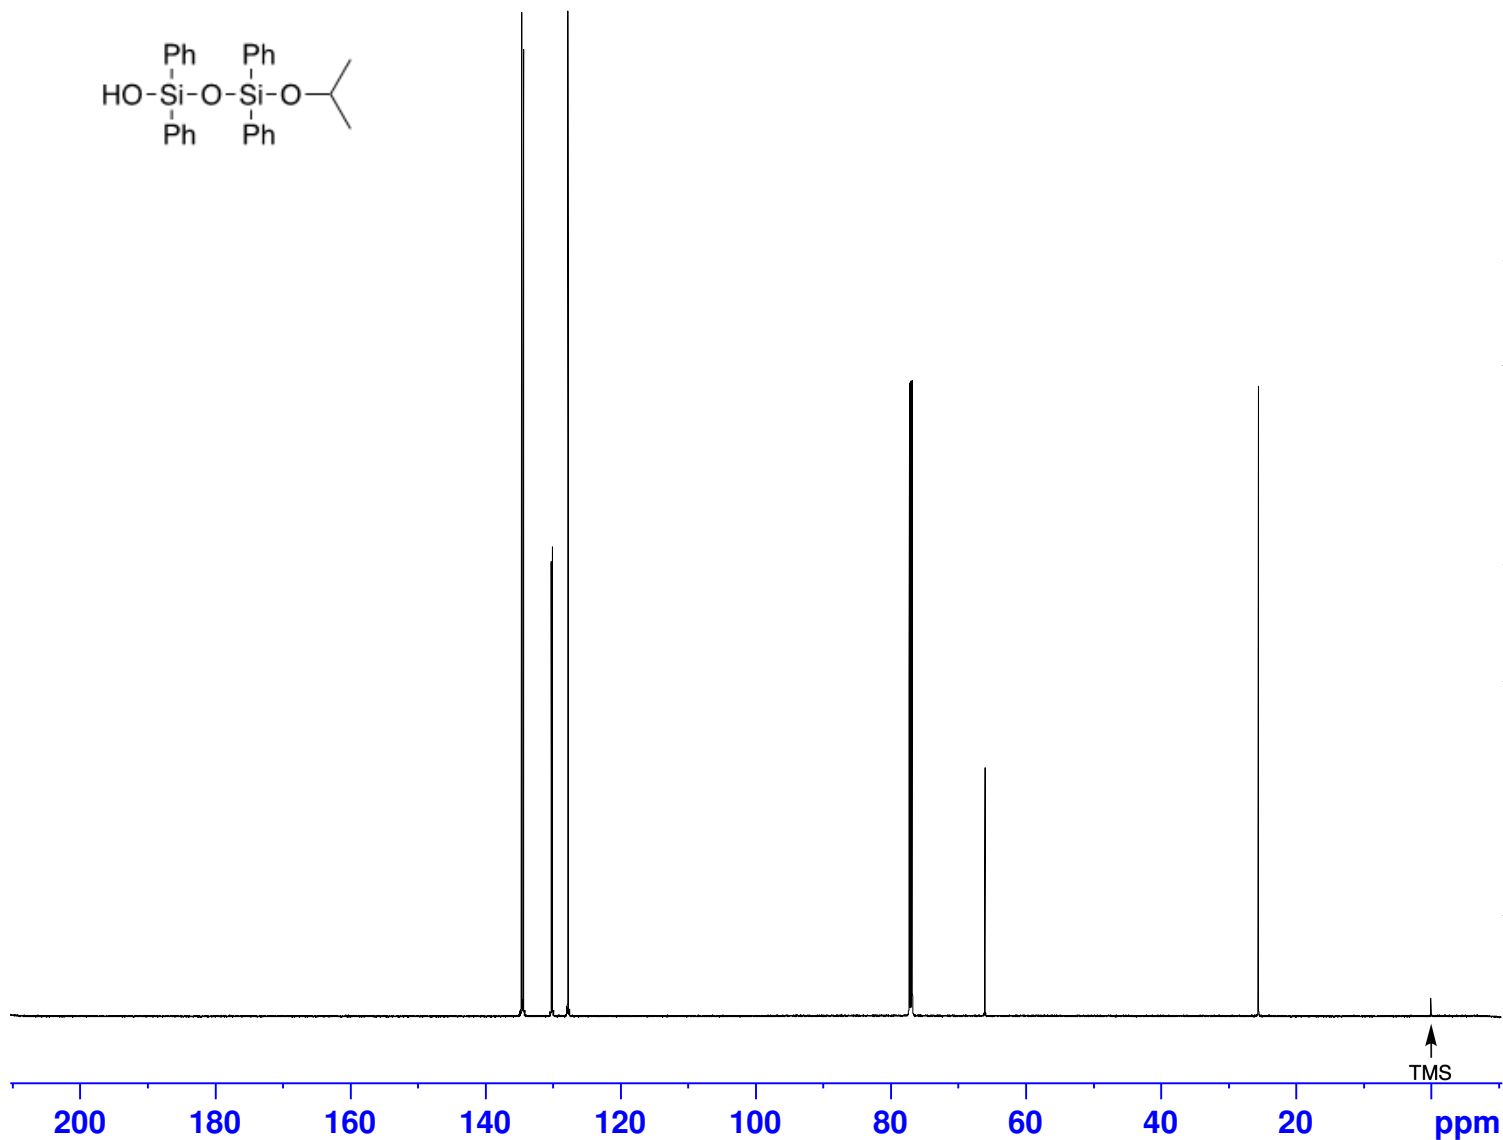

Figure S9. 3-Isopropoxyisopropoxy-1,1,3,3-tetraphenyldisiloxan-1-ol  
29Si NMR

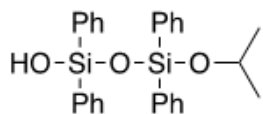

-36.88  
-40.11



Current Data Parameters  
NAME SBB-1  
EXPNO 52  
PROCNO 1

F2 - Acquisition Parameters  
Date\_ 20240228  
Time 10.11 h  
INSTRUM spect  
PROBHD z136133\_0001 (  
PULPROG zgig30  
TD 131072  
SOLVENT CDC13  
NS 256  
DS 2  
SWH 48076.922 Hz  
FIDRES 0.733596 Hz  
AQ 1.3631488 sec  
RG 128  
DW 10.400 usec  
DE 19.38 usec  
TE 300.0 K  
D1 10.00000000 sec  
D11 0.03000000 sec  
TD0 1  
SFO1 119.2289493 MHz  
NUC1 29Si  
P0 4.00 usec  
P1 12.00 usec  
PLW1 48.00000000 W  
SFO2 600.1324005 MHz  
NUC2 1H  
CPDPRG[2] waltz65  
PCPD2 70.00 usec  
PLW2 15.00000000 W  
PLW12 0.44082001 W

F2 - Processing parameters  
SI 131072  
SF 119.2289502 MHz  
WDW EM  
SSB 0  
LB 0.30 Hz  
GB 0  
PC 1.40

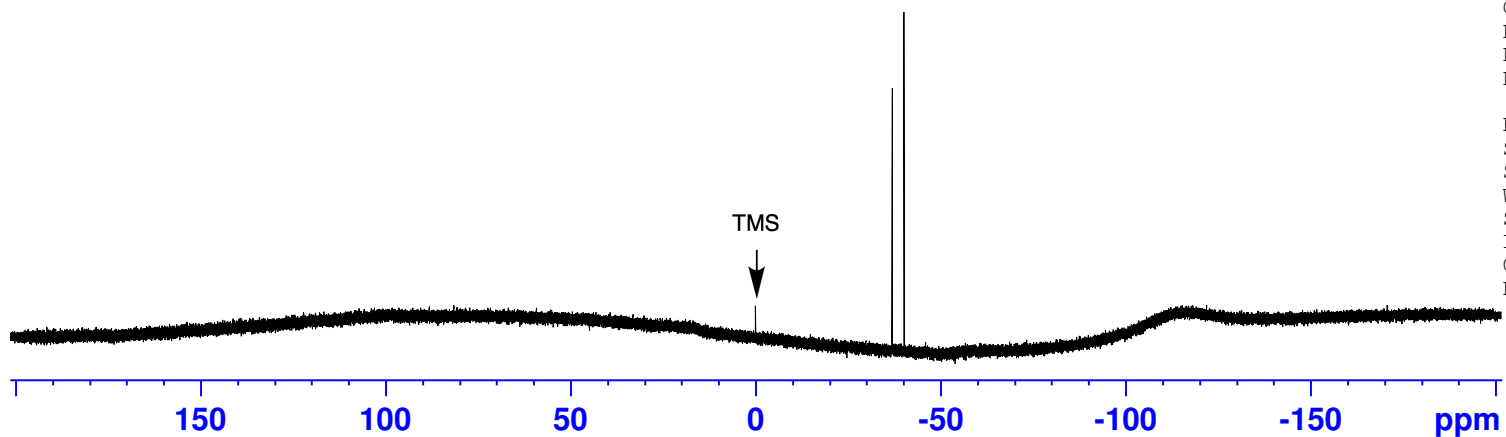

S25

Figure S10. 5-Isopropoxy-1,1-dimethyl-3,3,5,5-tetraphenyltrisiloxan-1-ol (9)  
1H NMR

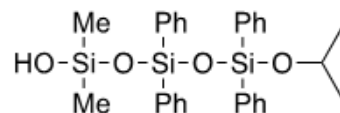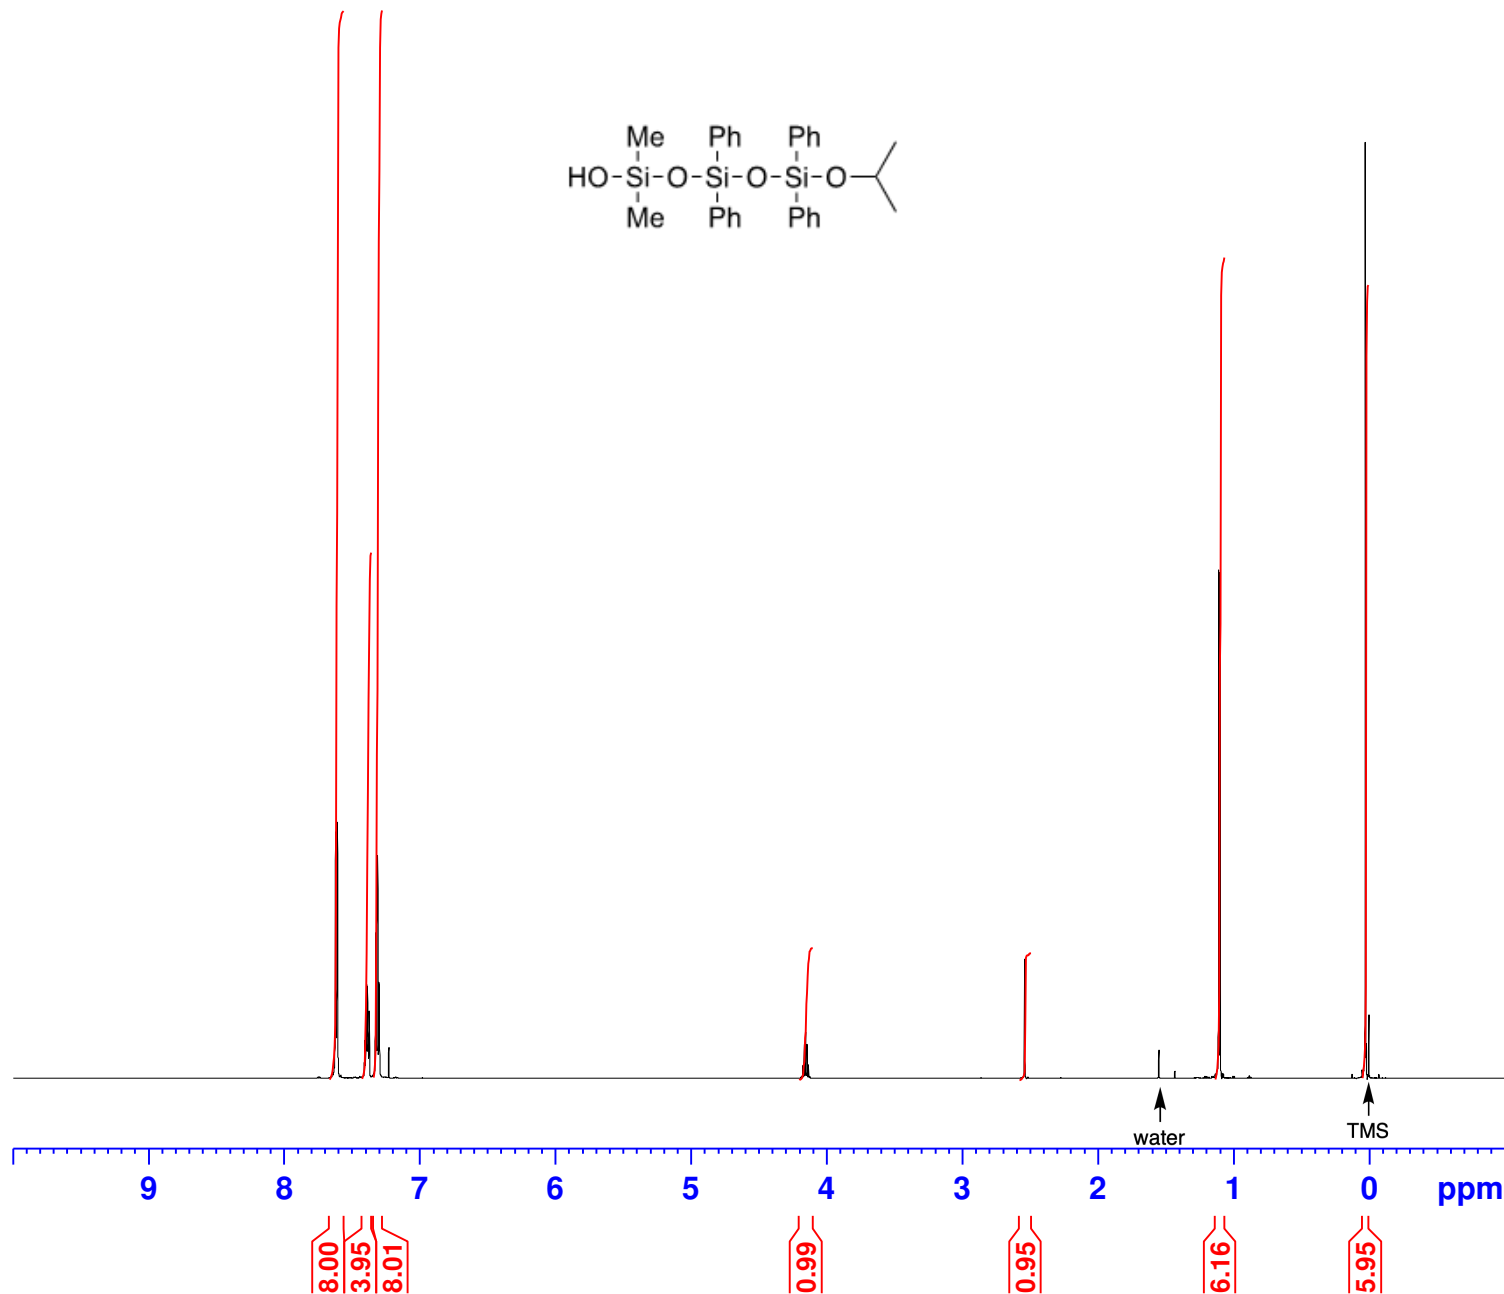

Current Data Parameters  
NAME kawatsu-1217-(BB-b)  
EXPNO 10  
PROCNO 1

F2 - Acquisition Parameters  
Date\_ 20210316  
Time 18.04  
INSTRUM spect  
PROBHD 5 mm CPBBO BB-  
PULPROG zg30  
TD 65536  
SOLVENT CDCl3  
NS 8  
DS 2  
SWH 12019.230 Hz  
FIDRES 0.183399 Hz  
AQ 2.7262976 sec  
RG 12.86  
DW 41.600 usec  
DE 15.65 usec  
TE 298.0 K  
D1 1.00000000 sec  
TD0 1

==== CHANNEL f1 =====  
SFO1 600.2330011 MHz  
NUC1 1H  
P1 12.00 usec  
PLW1 15.50000000 W

F2 - Processing parameters  
SI 65536  
SF 600.2300339 MHz  
WDW EM  
SSB 0  
LB 0.20 Hz  
GB 0  
PC 1.00

Figure S11. 5-Isopropoxy-1,1-dimethyl-3,3,5,5-tetraphenyltrisiloxan-1-ol (9)  
<sup>13</sup>C NMR

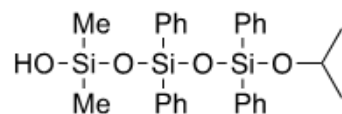

135.29  
 134.75  
 134.24  
 134.22  
 130.17  
 130.00  
 127.75  
 127.73  
 127.71

66.29

25.40

0.17

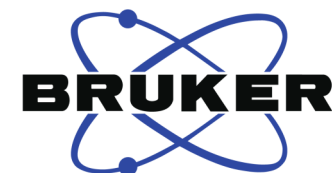

Current Data Parameters  
 NAME kawatsu-1217-(BB-b)  
 EXPNO 12  
 PROCNO 1

F2 - Acquisition Parameters  
 Date\_ 20210316  
 Time 19.03  
 INSTRUM spect  
 PROBHD 5 mm CPBBO BB-  
 PULPROG zgpg30  
 TD 65536  
 SOLVENT CDC13  
 NS 128  
 DS 2  
 SWH 33333.332 Hz  
 FIDRES 0.508626 Hz  
 AQ 0.9830400 sec  
 RG 193.87  
 DW 15.000 usec  
 DE 19.62 usec  
 TE 298.0 K  
 D1 2.00000000 sec  
 D11 0.03000000 sec  
 TD0 1

==== CHANNEL f1 =====  
 SFO1 150.9430468 MHz  
 NUC1 13C  
 P1 10.00 usec  
 PLW1 35.00000000 W

==== CHANNEL f2 =====  
 SFO2 600.2324009 MHz  
 NUC2 1H  
 CPDPRG[2] waltz65  
 PCPD2 70.00 usec  
 PLW2 15.50000000 W  
 PLW12 0.45550999 W  
 PLW13 0.22875001 W

F2 - Processing parameters  
 SI 65536  
 SF 150.9279614 MHz  
 WDW EM  
 SSB 0  
 LB 1.00 Hz  
 GB 0  
 PC 1.40

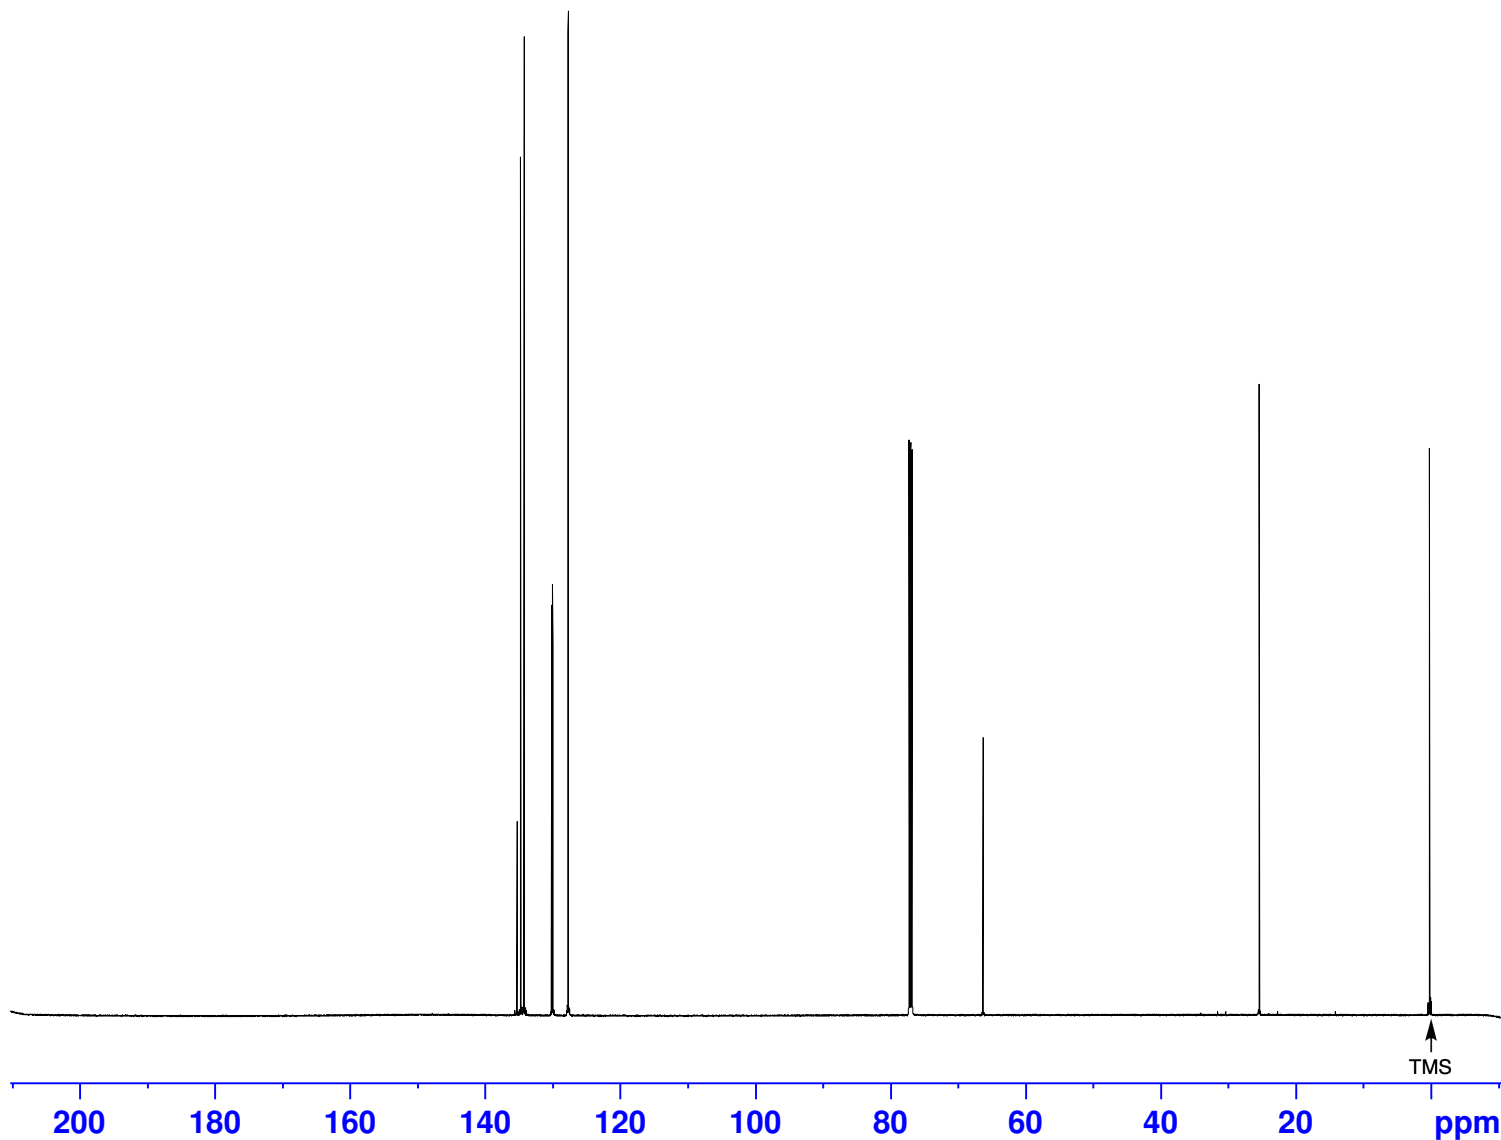

Figure S12. 5-Isopropoxy-1,1-dimethyl-3,3,5,5-tetraphenyltrisiloxan-1-ol (9)  
29Si NMR

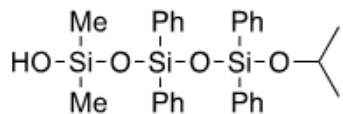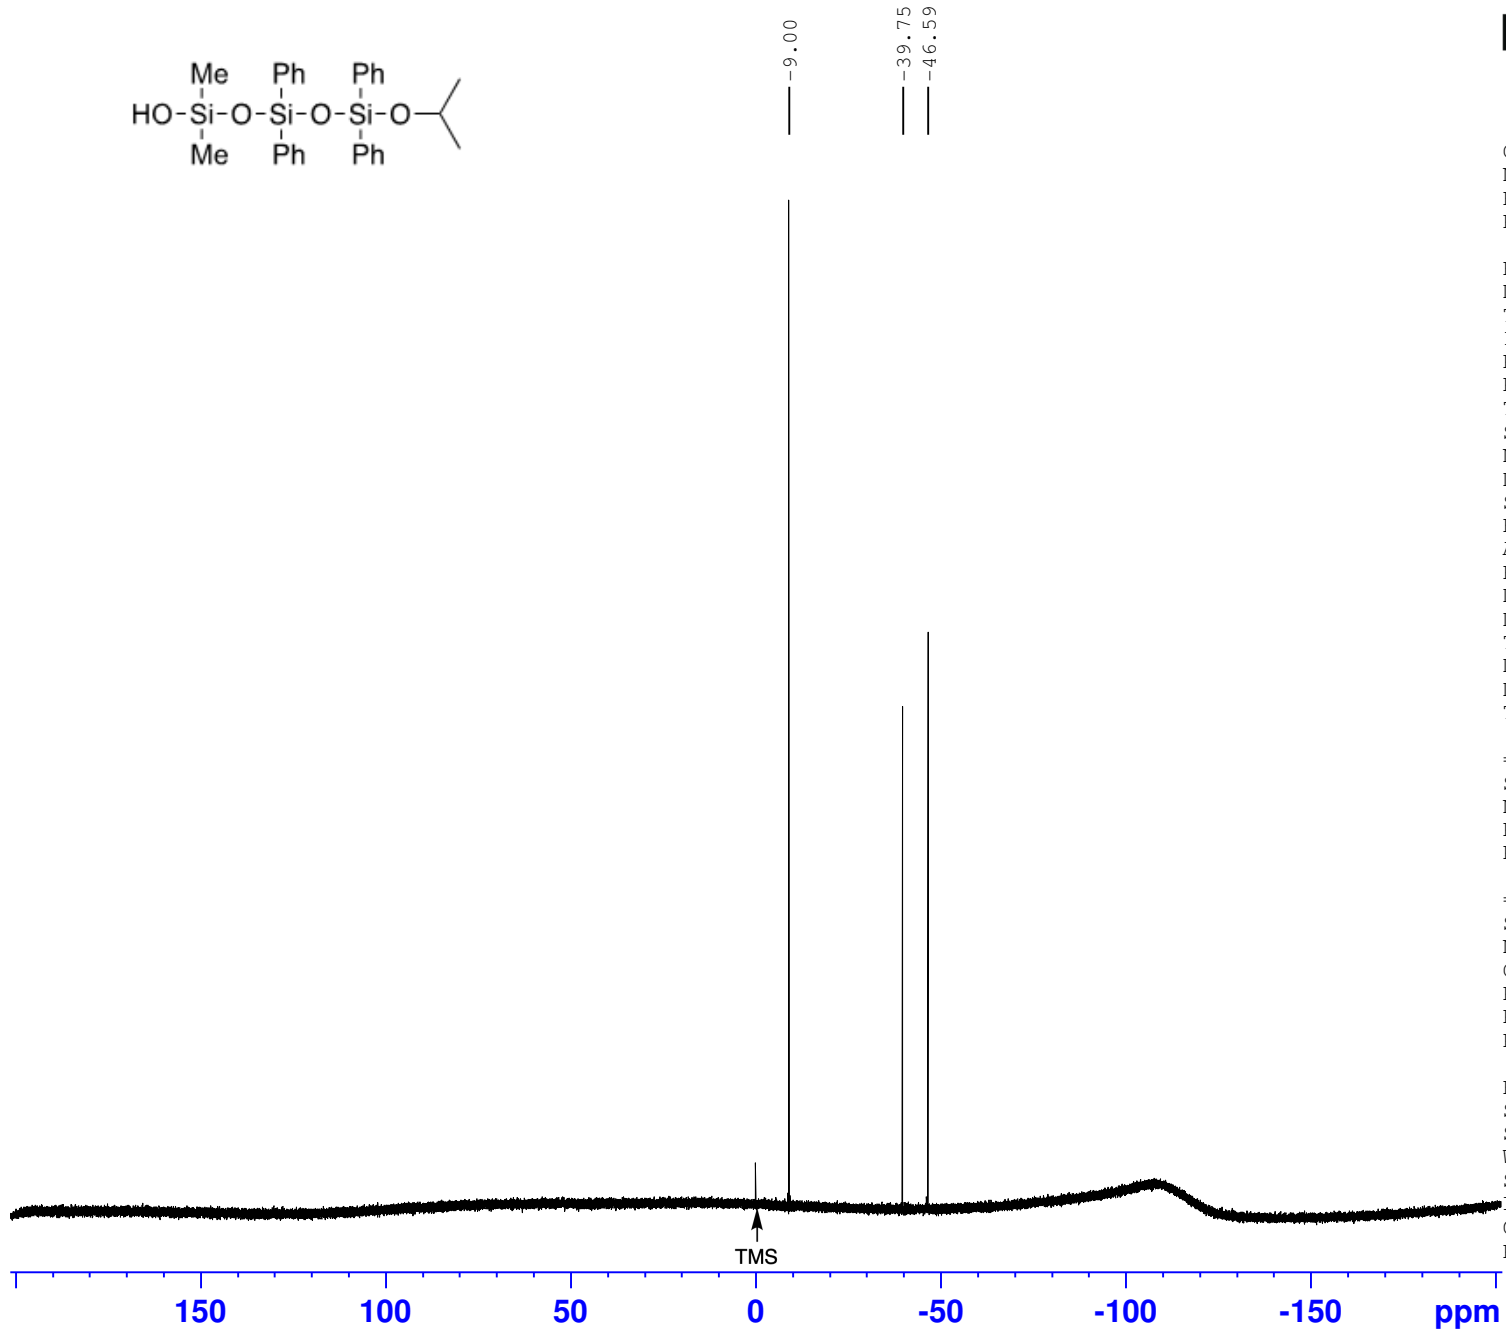

Current Data Parameters  
NAME kawatsu-1217-(BB-b)  
EXPNO 11  
PROCNO 1

F2 - Acquisition Parameters  
Date\_ 20210316  
Time 18.54  
INSTRUM spect  
PROBHD 5 mm CPBBO BB-  
PULPROG zgig30  
TD 131072  
SOLVENT CDC13  
NS 256  
DS 2  
SWH 48076.922 Hz  
FIDRES 0.366798 Hz  
AQ 1.3631488 sec  
RG 193.87  
DW 10.400 usec  
DE 18.90 usec  
TE 298.0 K  
D1 10.00000000 sec  
D11 0.03000000 sec  
TD0 1

=====  
CHANNEL f1  
SFO1 119.2488170 MHz  
NUC1 29Si  
P1 12.00 usec  
PLW1 44.50000000 W

=====  
CHANNEL f2  
SFO2 600.2324009 MHz  
NUC2 1H  
CPDPRG[2] waltz65  
PCPD2 70.00 usec  
PLW2 15.50000000 W  
PLW12 0.45550999 W

F2 - Processing parameters  
SI 131072  
SF 119.2488183 MHz  
WDW EM  
SSB 0  
LB 0.30 Hz  
GB 0  
PC 1.40

Figure S13. 5-Isopropoxy-5,5,5-trimethyl-1,1,3,3-tetraphenyltrisiloxane (8)  
1H NMR

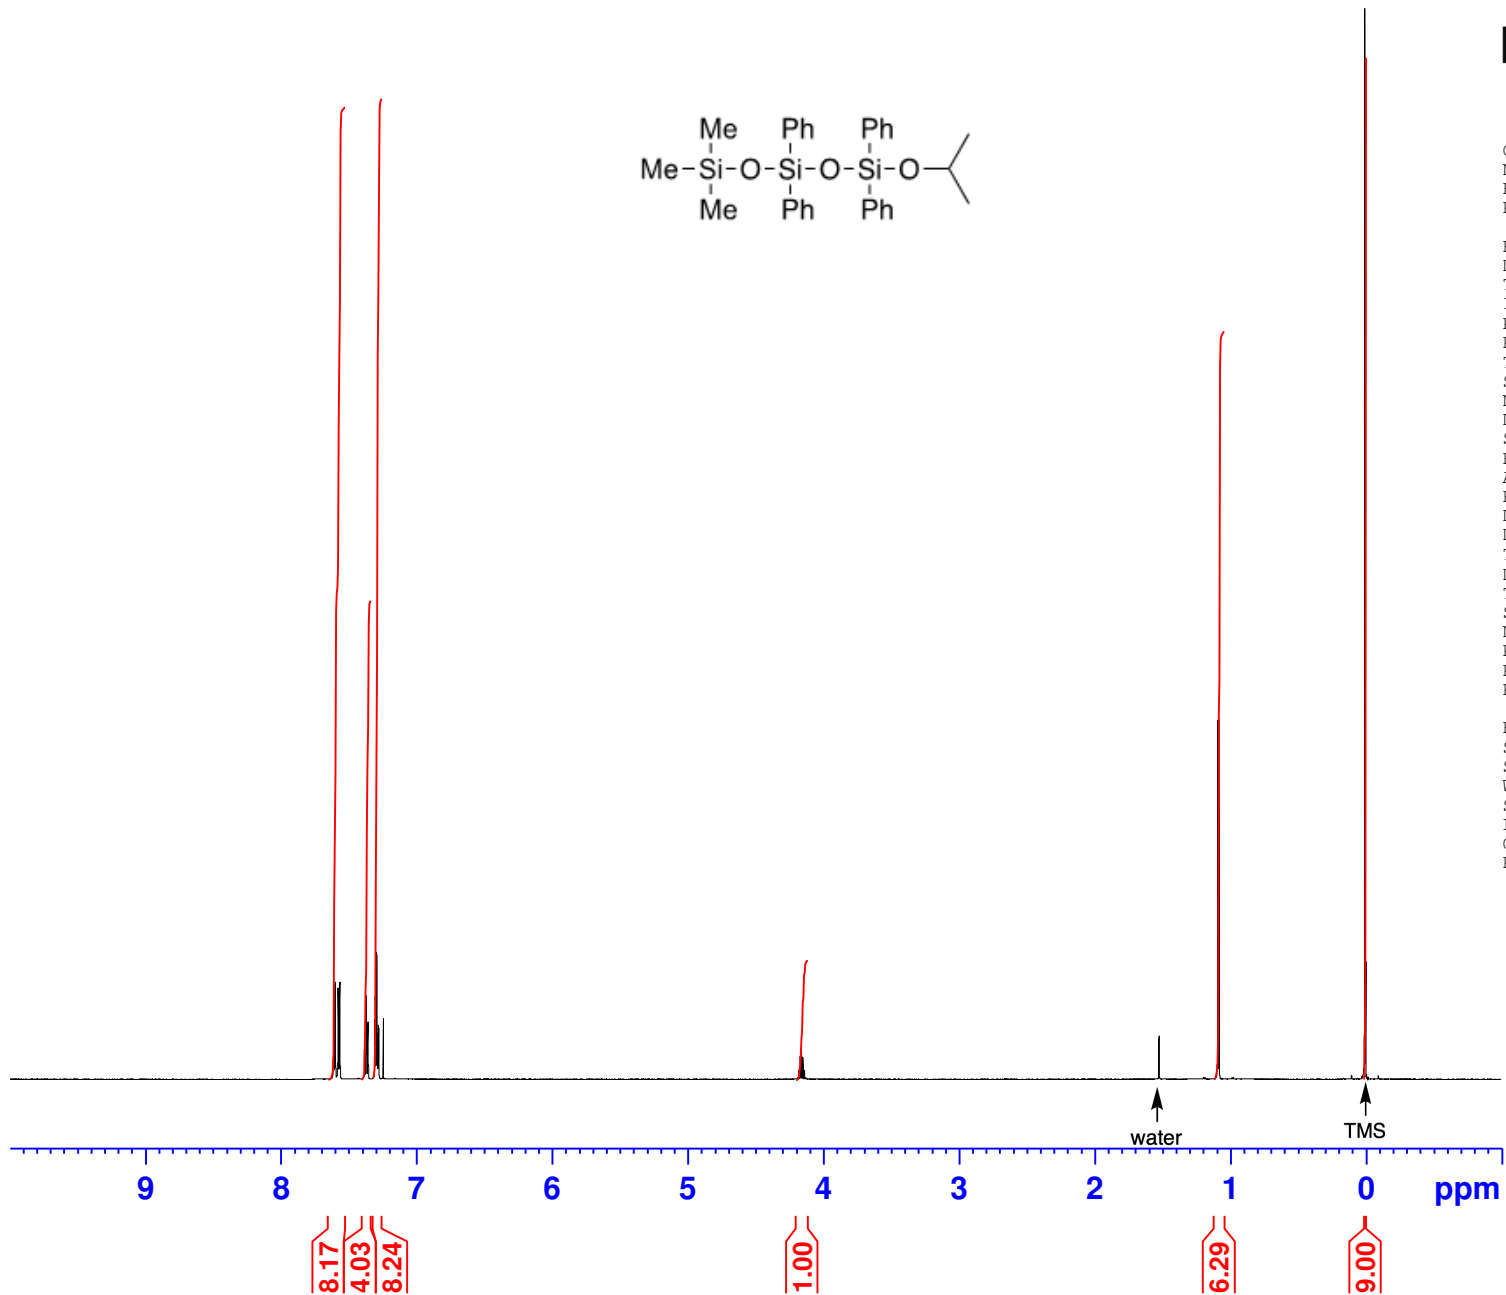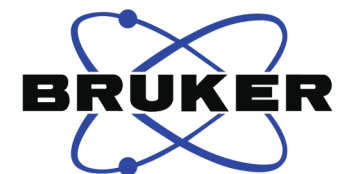

Current Data Parameters  
NAME OMR-20-Data (precursor-b)  
EXPNO 63  
PROCNO 1

F2 - Acquisition Parameters  
Date\_ 20210714  
Time 9.32 h  
INSTRUM spect  
PROBHD Z132572\_0019 (  
PULPROG zg30  
TD 65536  
SOLVENT CDCl3  
NS 8  
DS 2  
SWH 12019.230 Hz  
FIDRES 0.366798 Hz  
AQ 2.7262976 sec  
RG 19.72  
DW 41.600 usec  
DE 16.13 usec  
TE 298.0 K  
D1 1.00000000 sec  
TD0 1  
SFO1 600.2330011 MHz  
NUC1 1H  
P0 4.00 usec  
P1 12.00 usec  
PLW1 13.00000000 W

F2 - Processing parameters  
SI 65536  
SF 600.2300231 MHz  
WDW EM  
SSB 0  
LB 0.20 Hz  
GB 0  
PC 1.00

Figure S14.5-Isopropoxy-5,5,5-trimethyl-1,1,3,3-tetraphenyltrisiloxane (8)  
<sup>13</sup>C NMR

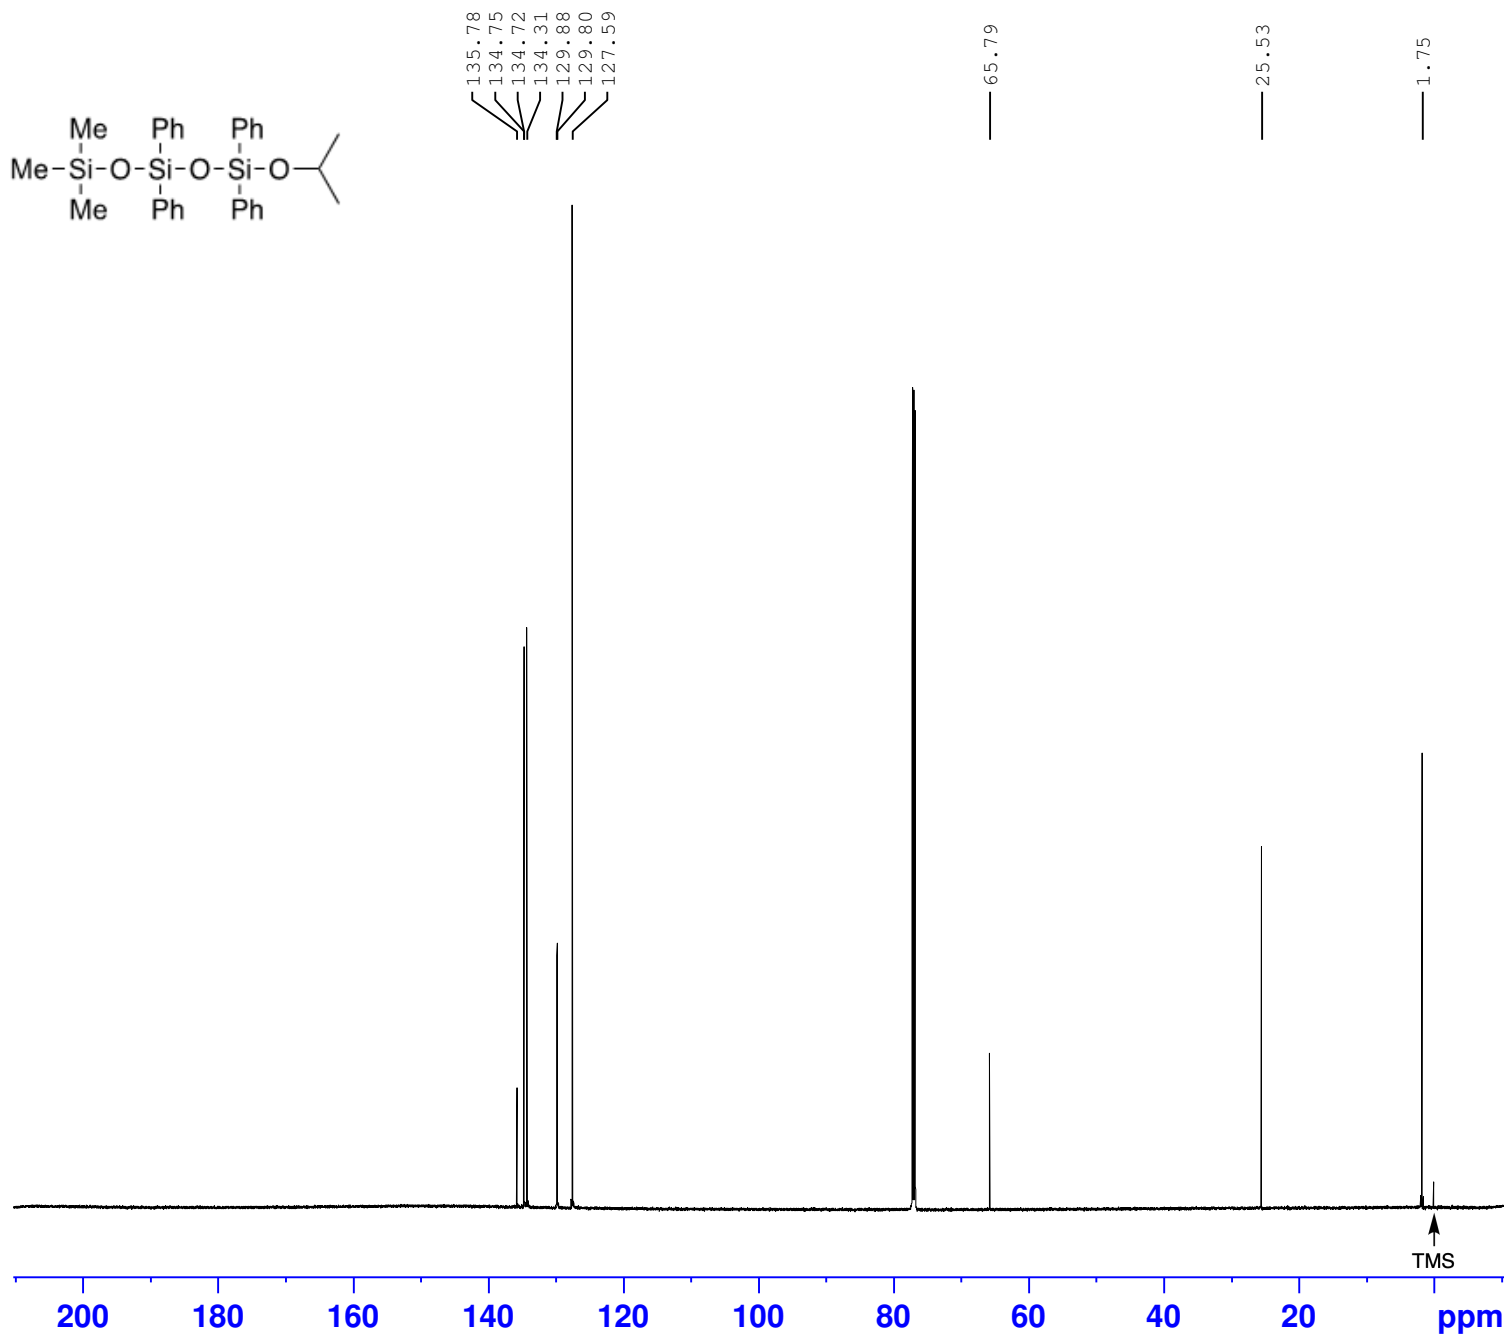

Current Data Parameters  
 NAME OMR-20-Data (precursor-b)  
 EXPNO 64  
 PROCNO 1

F2 - Acquisition Parameters  
 Date\_ 20210714  
 Time 9.36 h  
 INSTRUM spect  
 PROBHD Z132572\_0019 ( )  
 PULPROG zgpg30  
 TD 65536  
 SOLVENT CDCl3  
 NS 64  
 DS 2  
 SWH 33333.332 Hz  
 FIDRES 1.017253 Hz  
 AQ 0.9830400 sec  
 RG 193.87  
 DW 15.000 usec  
 DE 18.14 usec  
 TE 298.0 K  
 D1 2.00000000 sec  
 D11 0.03000000 sec  
 TD0 1  
 SFO1 150.9430463 MHz  
 NUC1 13C  
 P0 3.33 usec  
 P1 10.00 usec  
 PLW1 34.00000000 W  
 SFO2 600.2324009 MHz  
 NUC2 1H  
 CPDPRG[2] waltz65  
 PCPD2 70.00 usec  
 PLW2 13.00000000 W  
 PLW12 0.38203999 W  
 PLW13 0.19216000 W

F2 - Processing parameters  
 SI 65536  
 SF 150.9279578 MHz  
 WDW EM  
 SSB 0  
 LB 1.00 Hz  
 GB 0  
 PC 1.40

Figure S15. 5-Isopropoxy-5,5,5-trimethyl-1,1,3,3-tetraphenyltrisiloxane (8)  
29Si NMR

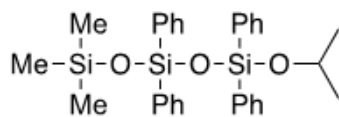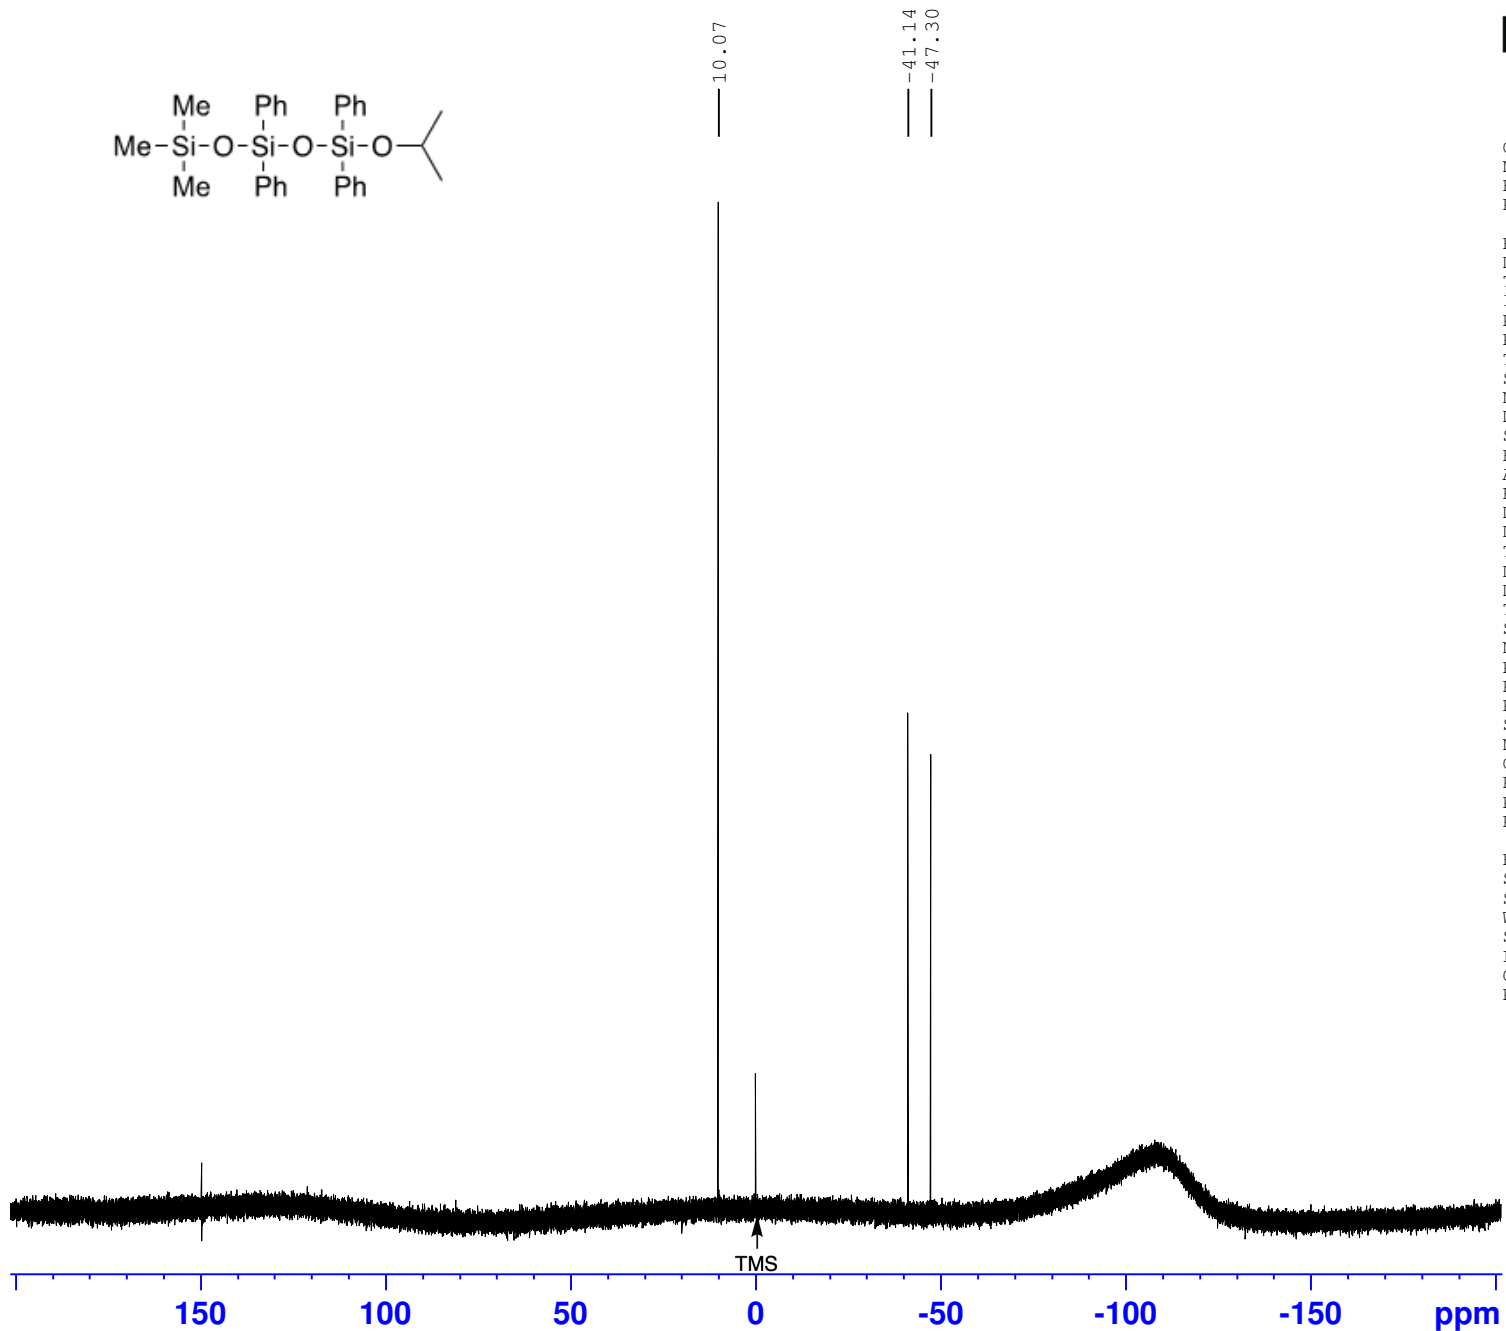

S31



Current Data Parameters  
NAME OMR-20-Data (precursor-b)  
EXPNO 65  
PROCNO 1

F2 - Acquisition Parameters  
Date\_ 20210714  
Time 10.27 h  
INSTRUM spect  
PROBHD Z132572\_0019 (  
PULPROG zgig30  
TD 131072  
SOLVENT CDC13  
NS 256  
DS 2  
SWH 48076.922 Hz  
FIDRES 0.733596 Hz  
AQ 1.3631488 sec  
RG 193.87  
DW 10.400 usec  
DE 19.38 usec  
TE 298.0 K  
D1 10.00000000 sec  
D11 0.03000000 sec  
TD0 1  
SFO1 119.2488165 MHz  
NUC1 29Si  
P0 4.00 usec  
P1 12.00 usec  
PLW1 45.00000000 W  
SFO2 600.2324009 MHz  
NUC2 1H  
CPDPRG[2] waltz65  
PCPD2 70.00 usec  
PLW2 13.00000000 W  
PLW12 0.38203999 W

F2 - Processing parameters  
SI 131072  
SF 119.2488173 MHz  
WDW EM  
SSB 0  
LB 0.30 Hz  
GB 0  
PC 1.40



Figure S16. 5-isopropoxyisopropoxy-1,1,3,3,5,5-hexaphenyltrisiloxan-1-ol  
1H NMR

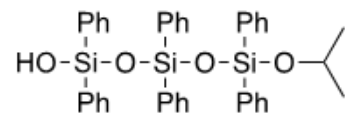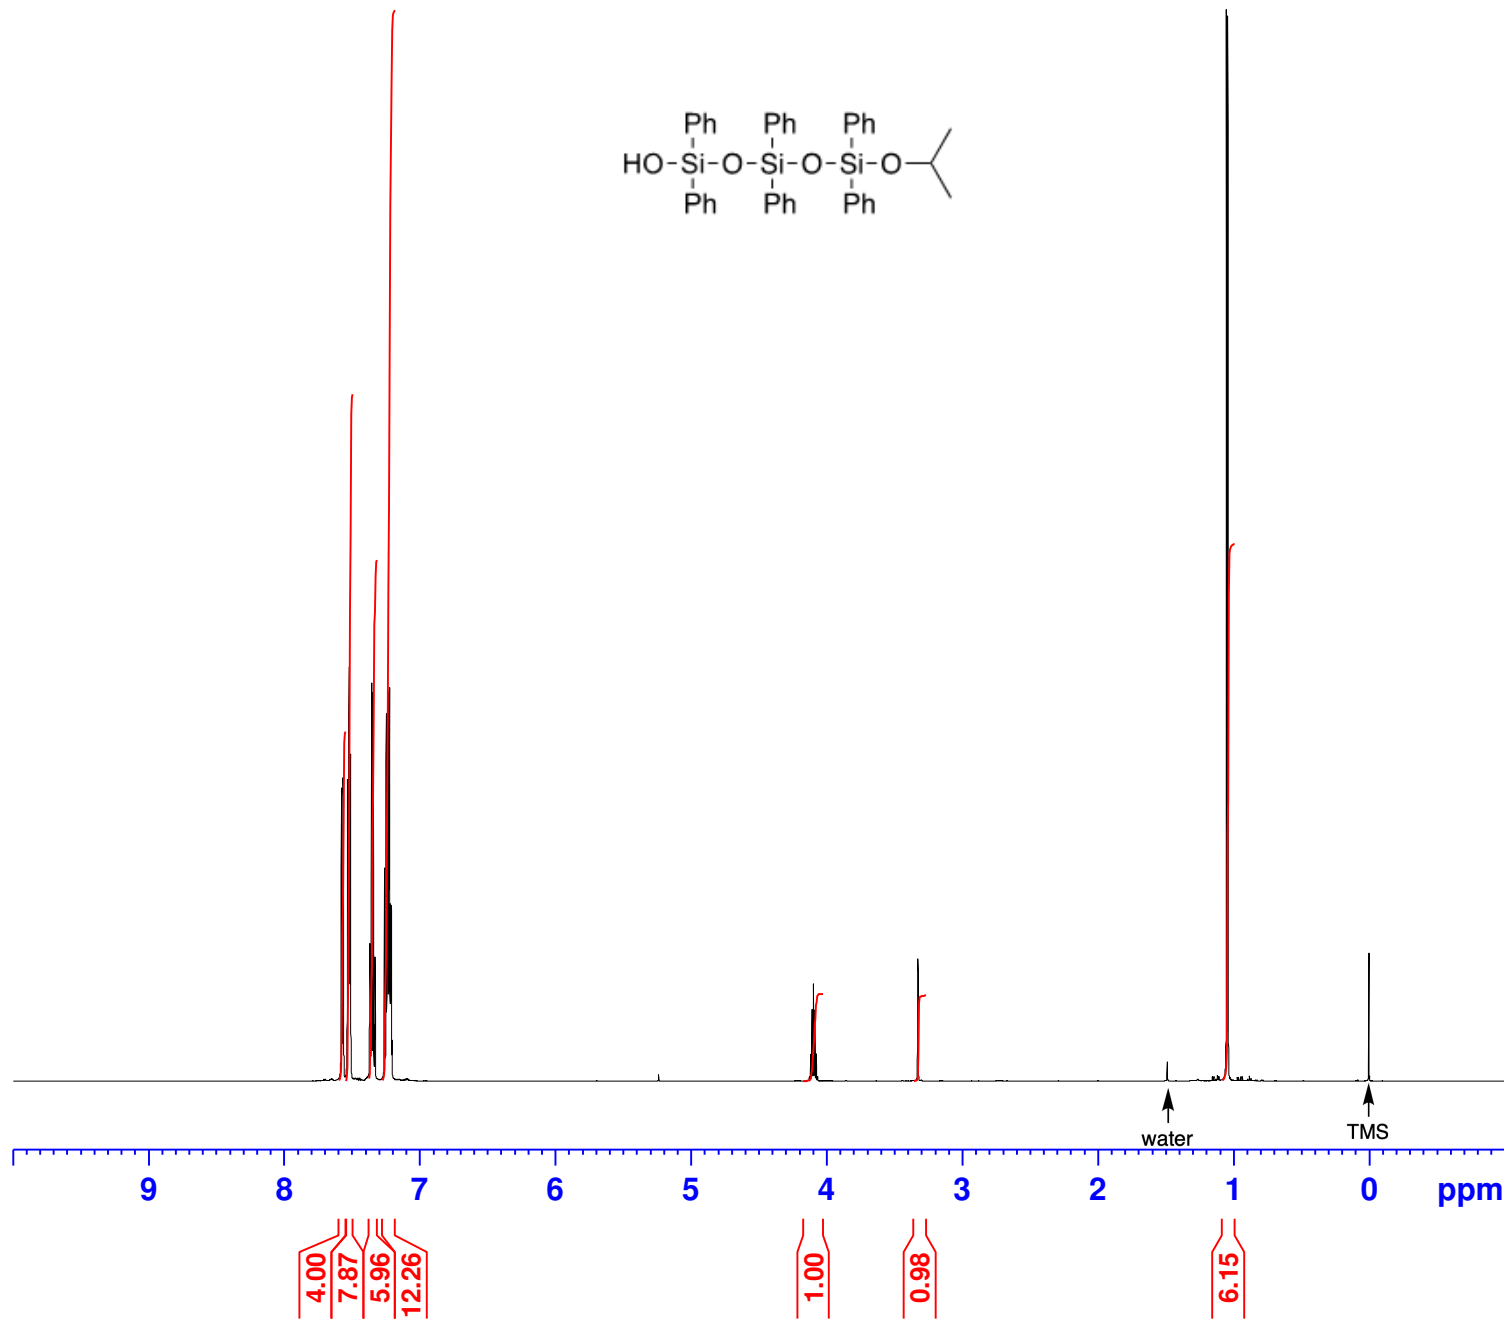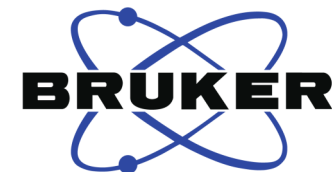

Current Data Parameters  
NAME kawatsu-1112-(HOPh2Si-O-Ph2Si-O-Ph2SiOiPr)  
EXPNO 10  
PROCNO 1

F2 - Acquisition Parameters  
Date\_ 20210726  
Time 22.03 h  
INSTRUM spect  
PROBHD z136133\_0001 ( )  
PULPROG zg30  
TD 65536  
SOLVENT CDCl3  
NS 8  
DS 2  
SWH 12019.230 Hz  
FIDRES 0.366798 Hz  
AQ 2.7262976 sec  
RG 16  
DW 41.600 usec  
DE 16.13 usec  
TE 298.0 K  
D1 1.00000000 sec  
TD0 1  
SFO1 600.1330006 MHz  
NUC1 1H  
PG 4.00 usec  
P1 12.00 usec  
PLW1 15.00000000 W

F2 - Processing parameters  
SI 65536  
SF 600.1300462 MHz  
WDW EM  
SSB 0  
LB 0.20 Hz  
GB 0  
PC 1.00

Figure S17. 5-Isopropoxyisopropoxy-1,1,3,3,5,5-hexaphenyltrisiloxan-1-ol  
13C NMR

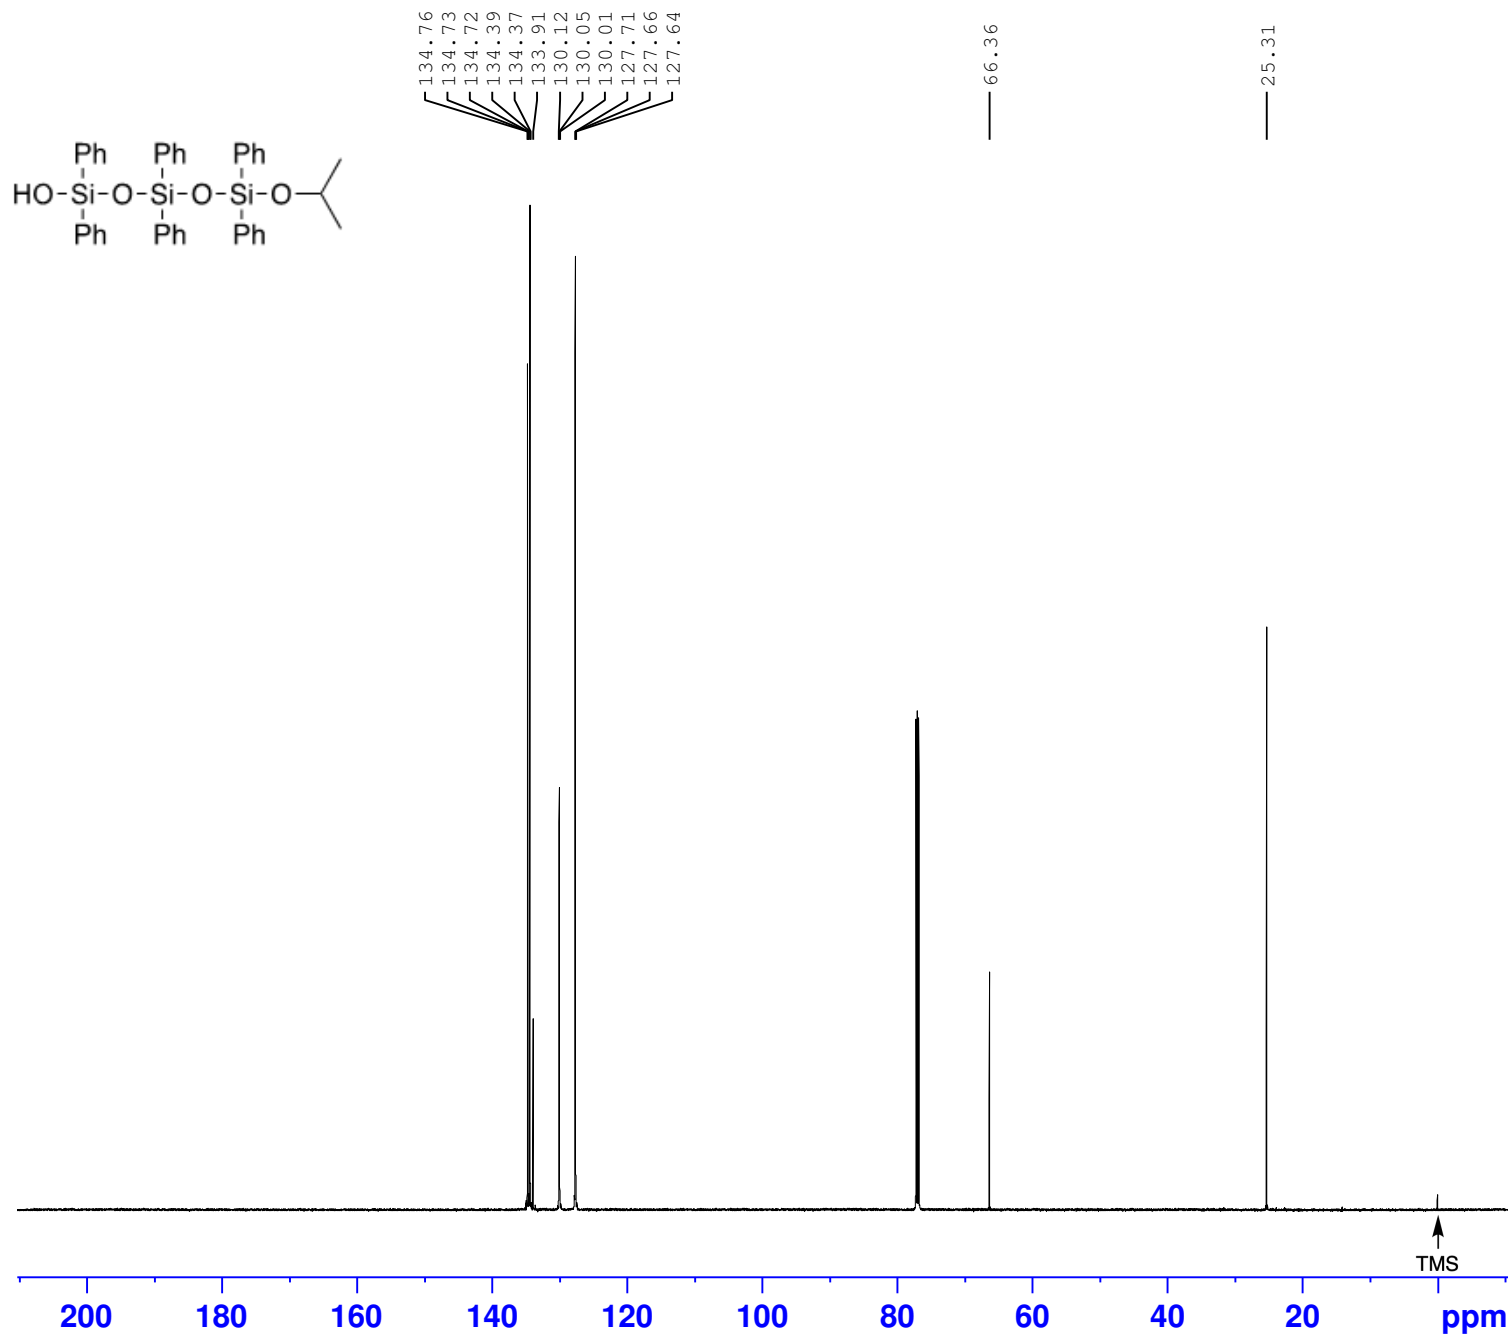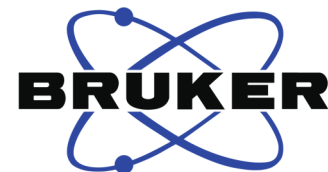

Current Data Parameters  
NAME kawatsu-1112-(HOPh2Si-O-Ph2Si-O-Ph2SiOiPr)  
EXPNO 11  
PROCNO 1

F2 - Acquisition Parameters  
Date\_ 20210726  
Time 22.10 h  
INSTRUM spect  
PROBHD z136133\_0001 ( )  
PULPROG zgpg30  
TD 65536  
SOLVENT CDCl3  
NS 64  
DS 2  
SWH 33333.332 Hz  
FIDRES 1.017253 Hz  
AQ 0.9830400 sec  
RG 203  
DW 15.000 usec  
DE 18.14 usec  
TE 300.0 K  
D1 2.0000000 sec  
D11 0.03000000 sec  
TD0 1  
SFO1 150.9178988 MHz  
NUC1 13C  
P0 3.33 usec  
P1 10.00 usec  
PLW1 48.00000000 W  
SFO2 600.1324005 MHz  
NUC2 1H  
CPDPRG2 waltz65  
PCPD2 70.00 usec  
PLW2 15.00000000 W  
PLW12 0.44082001 W  
PLW13 0.22172999 W

F2 - Processing parameters  
SI 65536  
SF 150.9028199 MHz  
WDW EM  
SSB 0  
LB 1.00 Hz  
GB 0  
PC 1.40

Figure S18. 5-Isopropoxyisopropoxy-1,1,3,3,5,5-hexaphenyltrisiloxan-1-ol  
29Si NMR

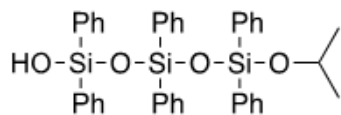

-36.75  
-39.36  
-45.01



Current Data Parameters  
NAME kawatsu-1112-(HOPh2Si-O-Ph2Si-O-Ph2SiO1Pr)  
EXPNO 12  
PROCNO 1

F2 - Acquisition Parameters  
Date\_ 20210726  
Time 23.01 h  
INSTRUM spect  
PROBHD z136133\_0001 (

PULPROG zgpg30  
TD 131072  
SOLVENT CDCl3  
NS 256  
DS 2  
SWH 48076.922 Hz  
FIDRES 0.733596 Hz  
AQ 1.3631488 sec  
RG 144  
DW 10.400 usec  
DE 19.38 usec  
TE 300.0 K  
D1 10.0000000 sec  
D11 0.03000000 sec  
TD0 1  
SFO1 119.2289493 MHz  
NUC1 29Si  
P0 4.00 usec  
P1 12.00 usec  
PLW1 48.00000000 W  
SFO2 600.1324005 MHz  
NUC2 1H  
CPDPRG2 waltz65  
PCPD2 70.00 usec  
PLW2 15.00000000 W  
PLW12 0.44082001 W

F2 - Processing parameters  
SI 131072  
SF 119.2289528 MHz  
WDW EM  
SSB 0  
LB 0.30 Hz  
GB 0  
PC 1.40

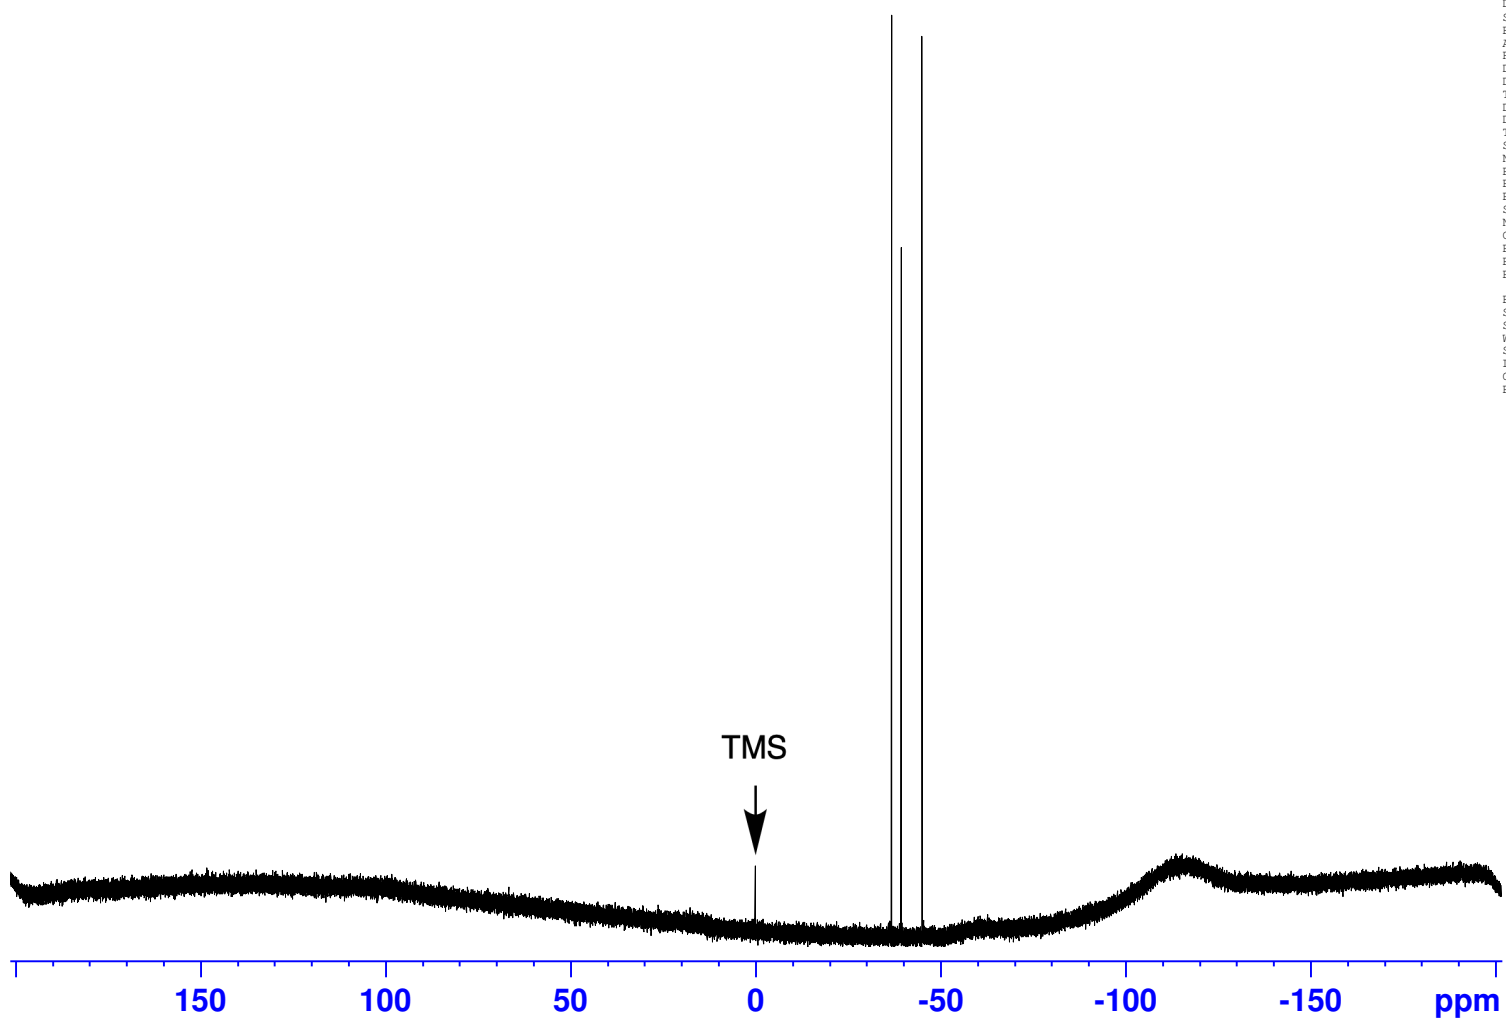

S34

Figure S19.9-Isopropoxy-1,1,3,3-tetramethyl-5,5,7,7,9,9-hexaphenylpentasiloxan-1-ol (12)  
1H NMR

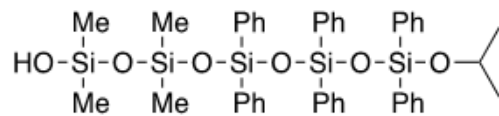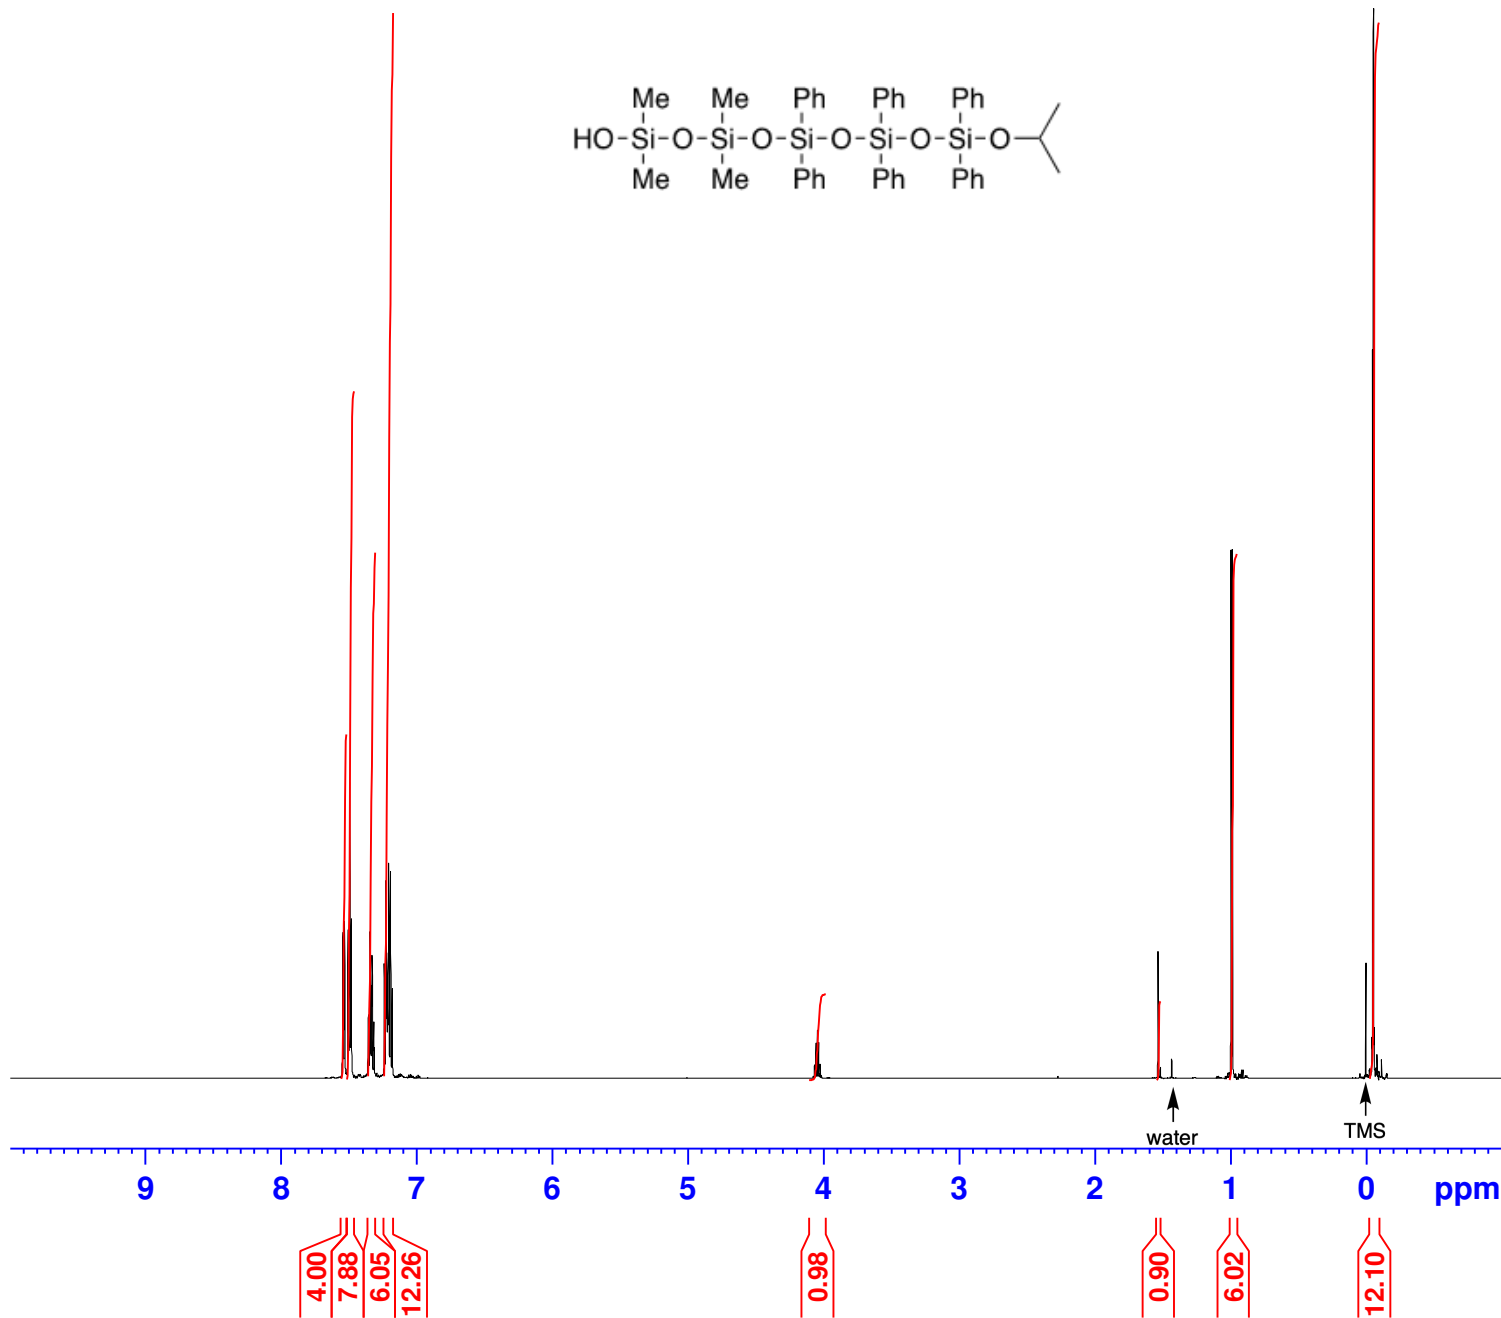

Current Data Parameters  
NAME kawatsu-1228-(BB-c)  
EXPNO 10  
PROCNO 1

F2 - Acquisition Parameters  
Date\_ 20210320  
Time 16.52  
INSTRUM spect  
PROBHD 5 mm CPBBO BB-  
PULPROG zg30  
TD 65536  
SOLVENT CDCl3  
NS 8  
DS 2  
SWH 12019.230 Hz  
FIDRES 0.183399 Hz  
AQ 2.7262976 sec  
RG 13.78  
DW 41.600 usec  
DE 15.65 usec  
TE 298.0 K  
D1 1.00000000 sec  
TD0 1

==== CHANNEL f1 =====  
SFO1 600.2330011 MHz  
NUC1 1H  
P1 12.00 usec  
PLW1 15.50000000 W

F2 - Processing parameters  
SI 65536  
SF 600.2300298 MHz  
WDW EM  
SSB 0  
LB 0.20 Hz  
GB 0  
PC 1.00

Figure S20. 9-Isopropoxy-1,1,3,3-tetramethyl-5,5,7,7,9,9-hexaphenylpentasiloxan-1-ol (12)  
 13 NMR



Current Data Parameters  
 NAME kawatsu-1228-(BB-c)  
 EXPNO 12  
 PROCNO 1

F2 - Acquisition Parameters  
 Date\_ 20210320  
 Time 17.48  
 INSTRUM spect  
 PROBHD 5 mm CPBBO BB-  
 PULPROG zgpg30  
 TD 65536  
 SOLVENT CDCl3  
 NS 64  
 DS 2  
 SWH 33333.332 Hz  
 FIDRES 0.508626 Hz  
 AQ 0.9830400 sec  
 RG 193.87  
 DW 15.000 usec  
 DE 19.62 usec  
 TE 298.0 K  
 D1 2.00000000 sec  
 D11 0.03000000 sec  
 TD0 1

==== CHANNEL f1 =====  
 SFO1 150.9430468 MHz  
 NUC1 13C  
 P1 10.00 usec  
 PLW1 35.00000000 W

==== CHANNEL f2 =====  
 SFO2 600.2324009 MHz  
 NUC2 1H  
 CPDPRG[2] waltz65  
 PCPD2 70.00 usec  
 PLW2 15.50000000 W  
 PLW12 0.45550999 W  
 PLW13 0.22875001 W

F2 - Processing parameters  
 SI 65536  
 SF 150.9279600 MHz  
 WDW EM  
 SSB 0  
 LB 1.00 Hz  
 GB 0  
 PC 1.40

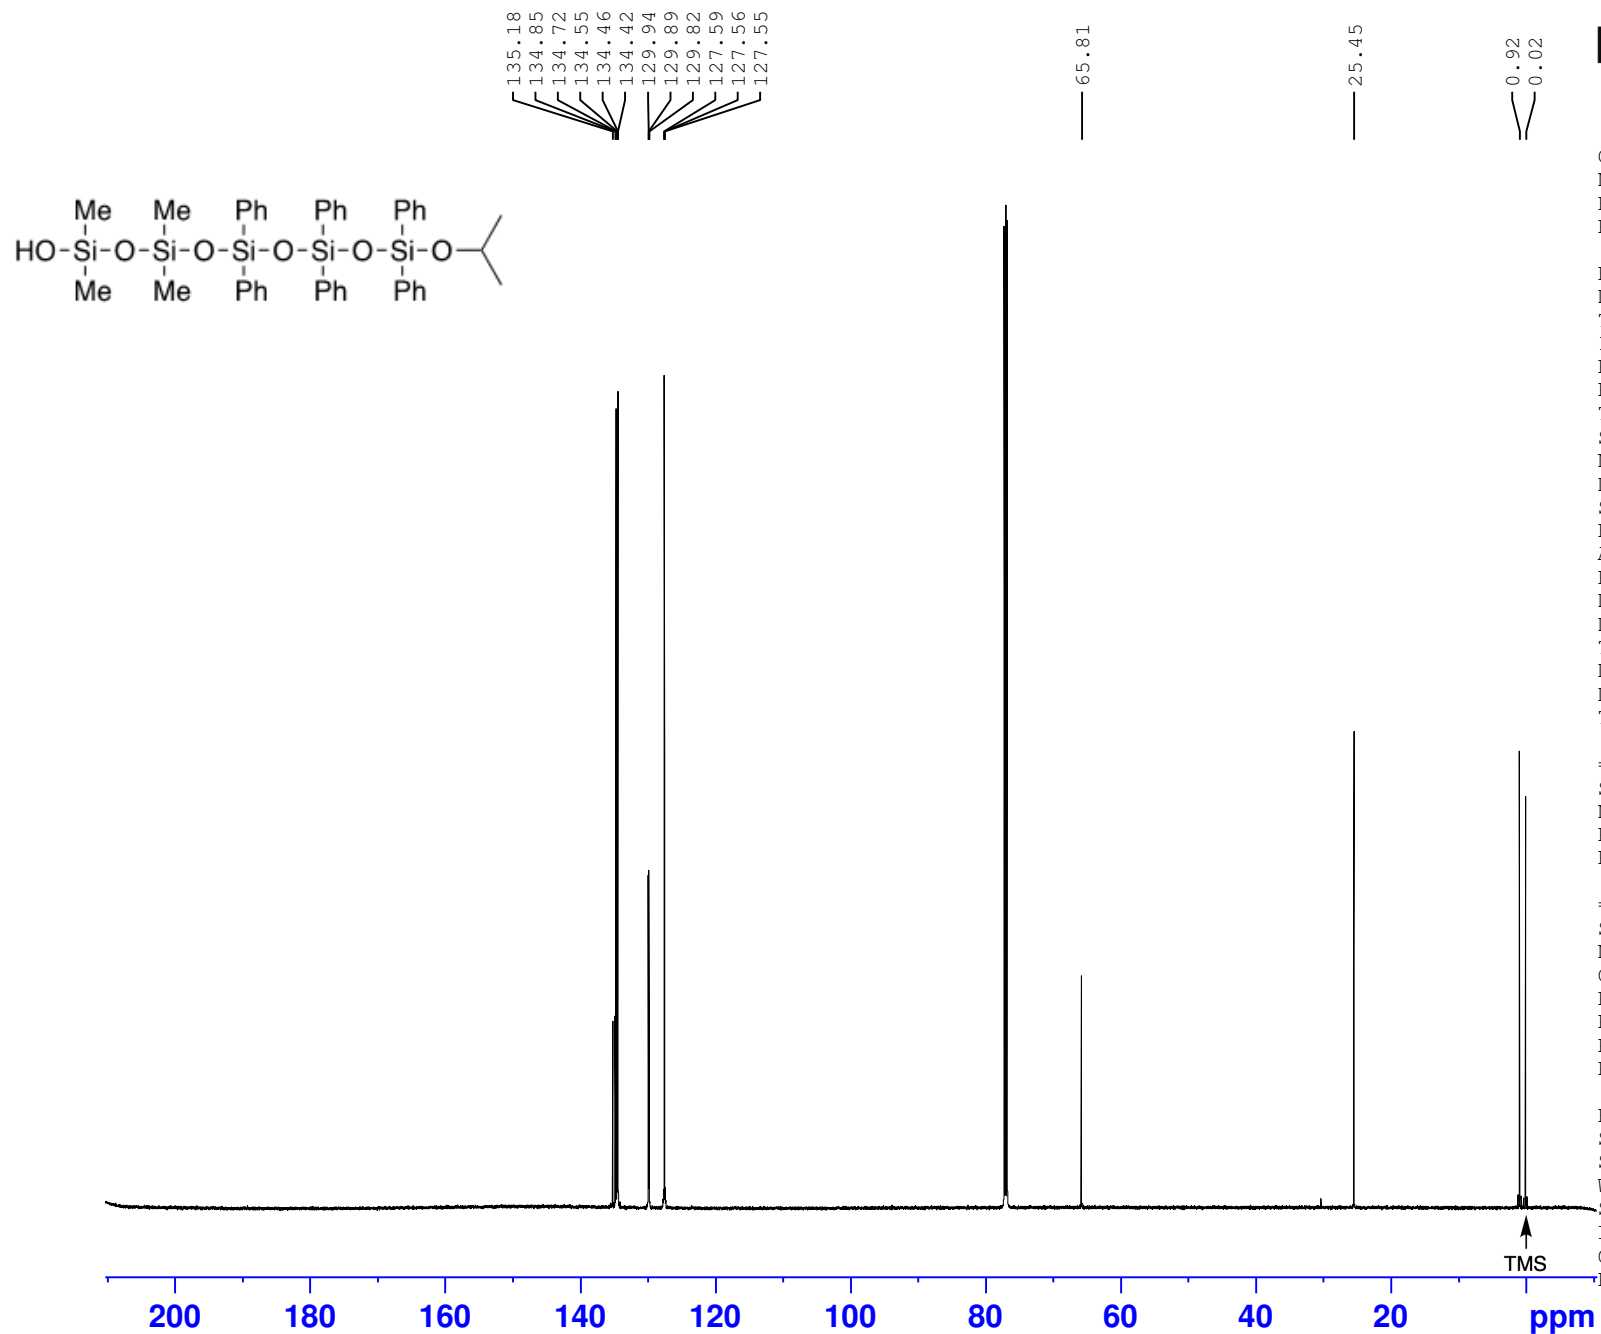



Figure S22. 1-Isopropoxy-7,7,7-trimethyl-1,1,3,3,5,5-hexaphenyltetrasiloxane (11)  
1H NMR

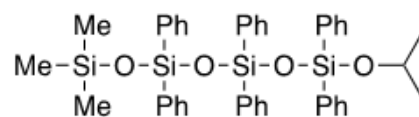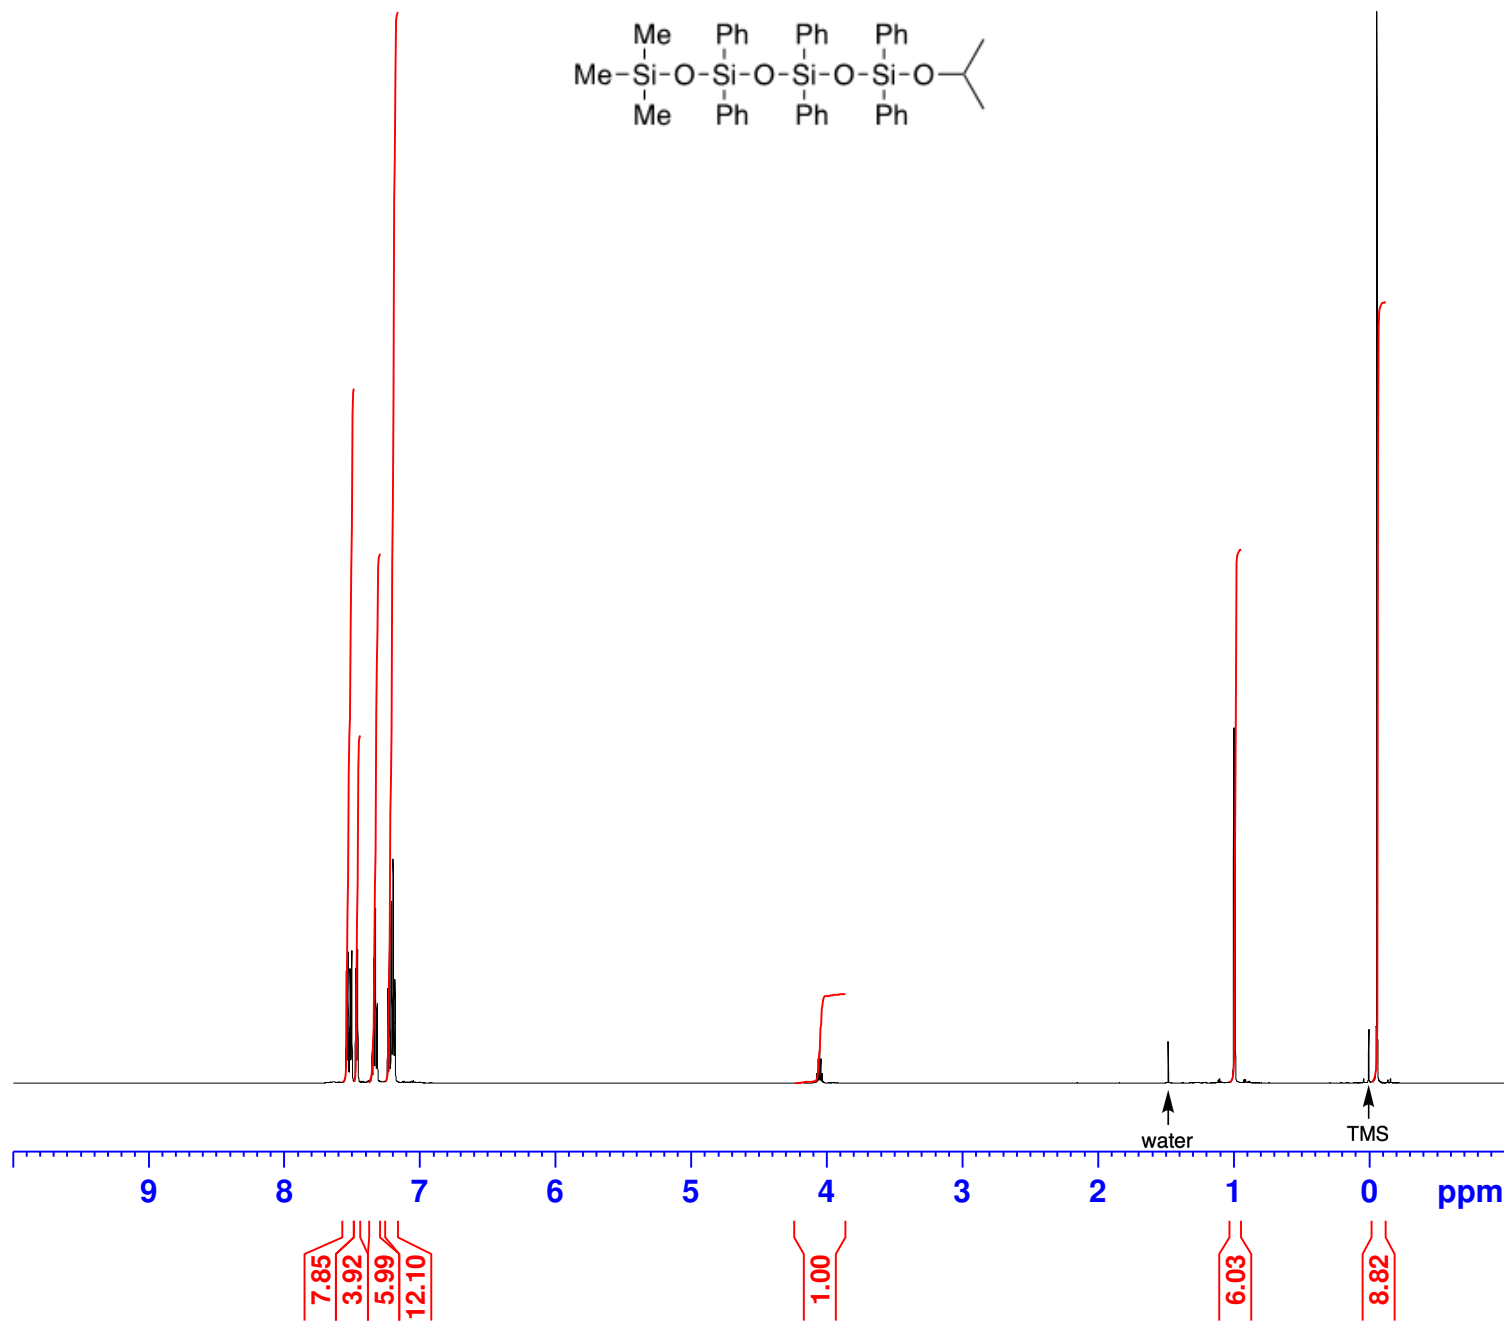

Current Data Parameters  
NAME OMR-18-Data (precursor-c)  
EXPNO 10  
PROCNO 1

F2 - Acquisition Parameters  
Date\_ 20210713  
Time 14.37 h  
INSTRUM spect  
PROBHD Z136133\_0001 (  
PULPROG zg30  
TD 65536  
SOLVENT CDCl3  
NS 8  
DS 2  
SWH 12019.230 Hz  
FIDRES 0.366798 Hz  
AQ 2.7262976 sec  
RG 18  
DW 41.600 usec  
DE 16.13 usec  
TE 298.0 K  
D1 1.00000000 sec  
TD0 1  
SFO1 600.1330006 MHz  
NUC1 1H  
P0 4.00 usec  
P1 12.00 usec  
PLW1 15.00000000 W

F2 - Processing parameters  
SI 65536  
SF 600.1300370 MHz  
WDW EM  
SSB 0  
LB 0.20 Hz  
GB 0  
PC 1.00

Figure S23. 1-Isopropoxy-7,7,7-trimethyl-1,1,3,3,5,5-hexaphenyltetrasiloxane (11)  
<sup>13</sup>C NMR

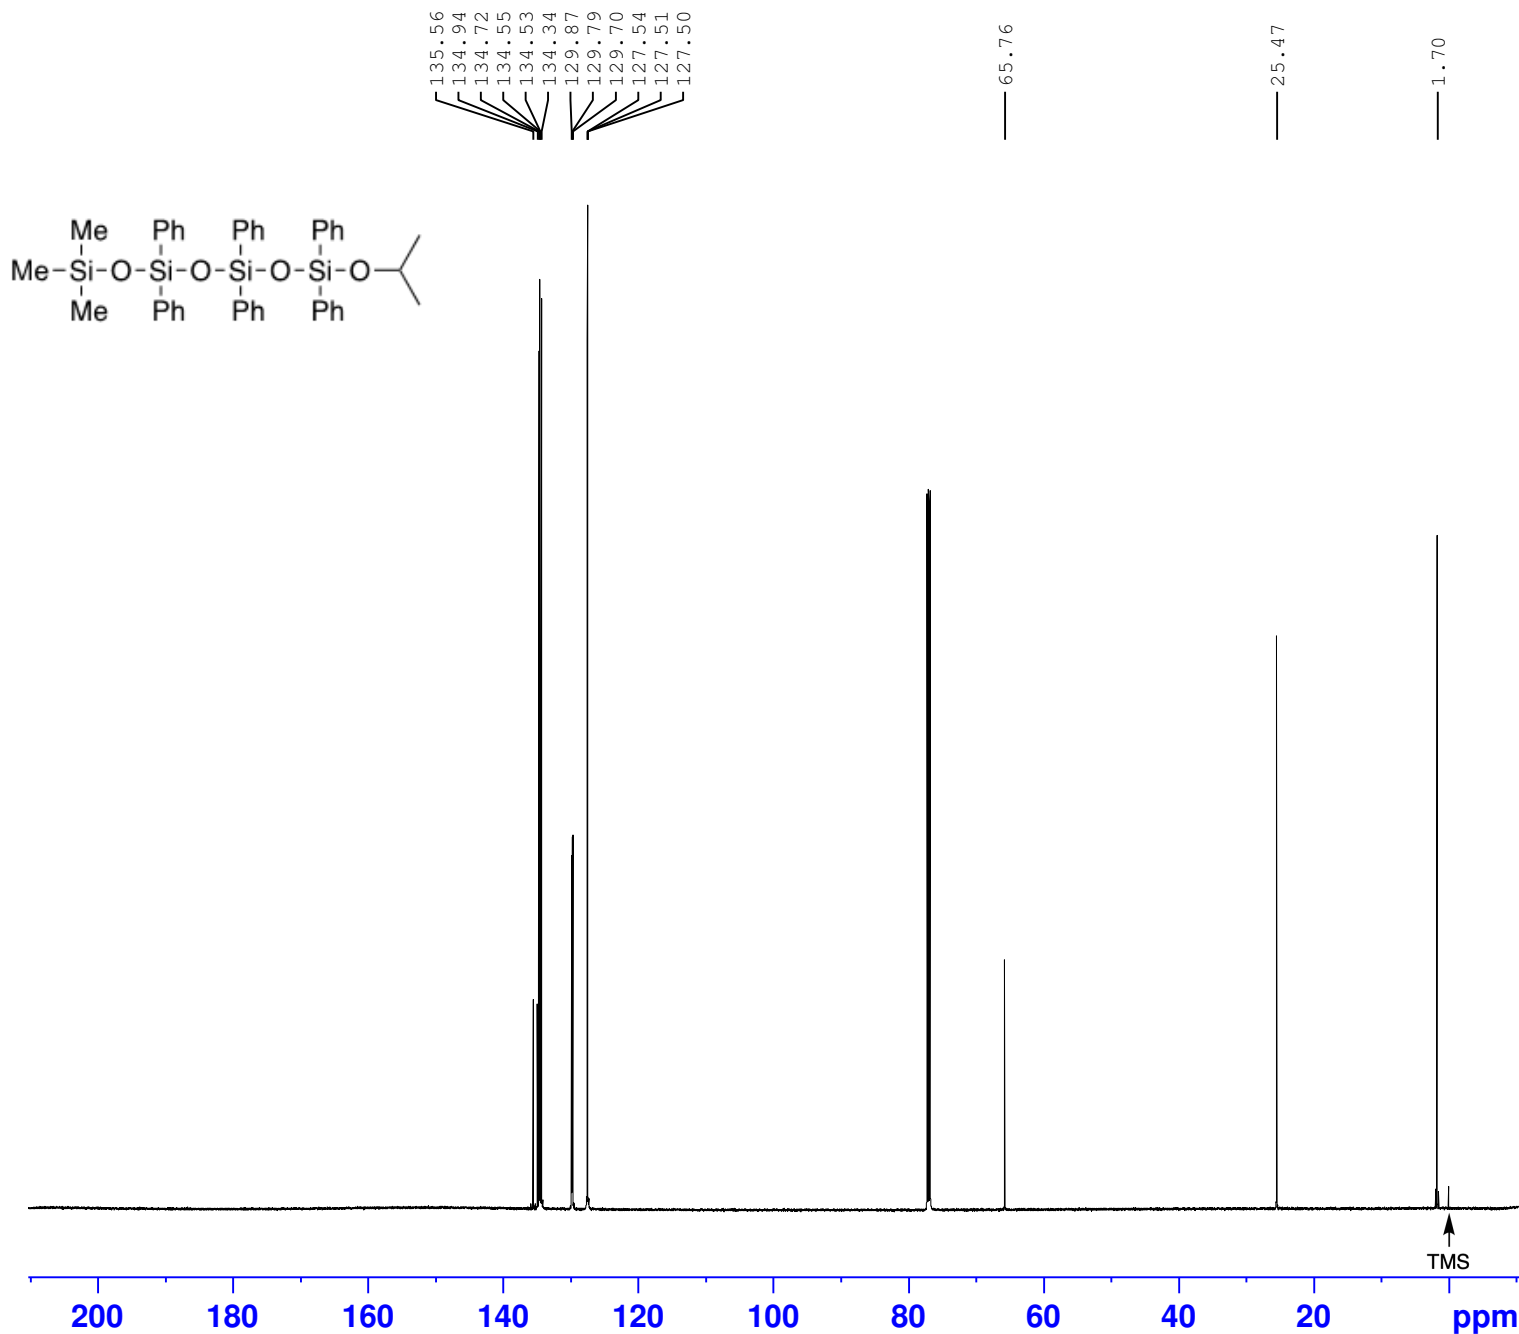

Current Data Parameters  
 NAME OMR-18-Data (precursor-c)  
 EXPNO 11  
 PROCNO 1

F2 - Acquisition Parameters  
 Date\_ 20210713  
 Time 11.59 h  
 INSTRUM spect  
 PROBHD Z132572\_0019 ( )  
 PULPROG zgpg30  
 TD 65536  
 SOLVENT CDCl3  
 NS 64  
 DS 2  
 SWH 33333.332 Hz  
 FIDRES 1.017253 Hz  
 AQ 0.9830400 sec  
 RG 193.87  
 DW 15.000 usec  
 DE 18.14 usec  
 TE 298.0 K  
 D1 2.00000000 sec  
 D11 0.03000000 sec  
 TD0 1  
 SFO1 150.9430463 MHz  
 NUC1 13C  
 P0 3.33 usec  
 P1 10.00 usec  
 PLW1 34.00000000 W  
 SFO2 600.2324009 MHz  
 NUC2 1H  
 CPDPRG[2] waltz65  
 PCPD2 70.00 usec  
 PLW2 13.00000000 W  
 PLW12 0.38203999 W  
 PLW13 0.19216000 W

F2 - Processing parameters  
 SI 65536  
 SF 150.9279625 MHz  
 WDW EM  
 SSB 0  
 LB 1.00 Hz  
 GB 0  
 PC 1.40



Figure S24. 1-Isopropoxy-7,7,7-trimethyl-1,1,3,3,5,5-hexaphenyltetrasiloxane (11)  
29Si NMR

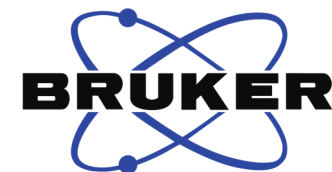

Current Data Parameters  
NAME OMR-18-Data (precursor-c)  
EXPNO 12  
PROCNO 1

F2 - Acquisition Parameters  
Date\_ 20210713  
Time 11.53 h  
INSTRUM spect  
PROBHD Z132572\_0019 (  
PULPROG zgig30  
TD 131072  
SOLVENT CDC13  
NS 256  
DS 2  
SWH 48076.922 Hz  
FIDRES 0.733596 Hz  
AQ 1.3631488 sec  
RG 193.87  
DW 10.400 usec  
DE 19.38 usec  
TE 298.0 K  
D1 10.00000000 sec  
D11 0.03000000 sec  
TD0 1  
SFO1 119.2488165 MHz  
NUC1 29Si  
P0 4.00 usec  
P1 12.00 usec  
PLW1 45.00000000 W  
SFO2 600.2324009 MHz  
NUC2 1H  
CPDPRG[2] waltz65  
PCPD2 70.00 usec  
PLW2 13.00000000 W  
PLW12 0.38203999 W

F2 - Processing parameters  
SI 131072  
SF 119.2488192 MHz  
WDW EM  
SSB 0  
LB 0.30 Hz  
GB 0  
PC 1.40

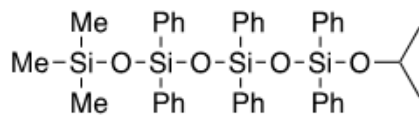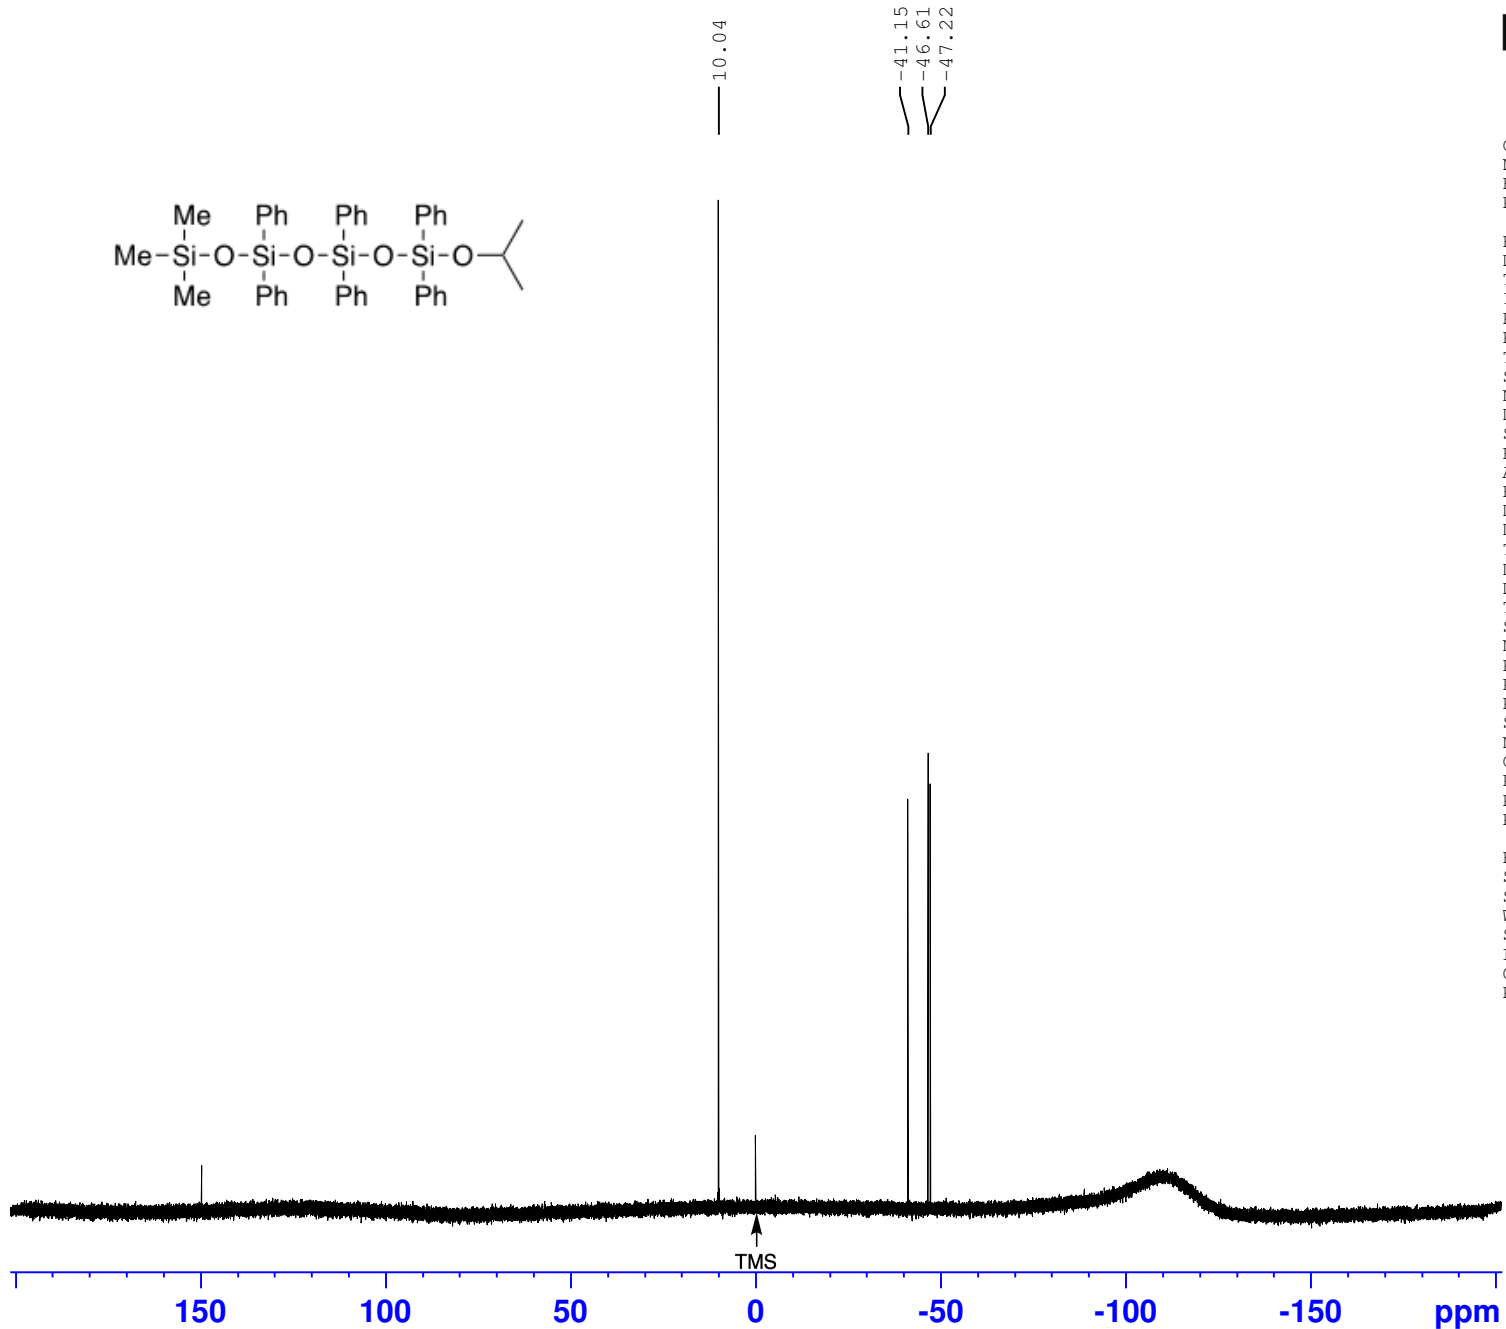

Figure S25. 7-Isopropoxylisopropoxy-1,1,3,3,5,5,7,7-octaphenyltetrasiloxan-1-ol 1H NMR



Current Data Parameters  
NAME OMR-22  
EXPNO 700  
PROCNO 1

F2 - Acquisition Parameters  
Date\_ 20211004  
Time 15.45 h  
INSTRUM spect  
PROBHD z132572\_0019 (  
PULPROG zg30  
TD 65536  
SOLVENT CDC13  
NS 32  
DS 2  
SWH 12019.230 Hz  
FIDRES 0.366798 Hz  
AQ 2.7262976 sec  
RG 27.99  
DW 41.600 usec  
DE 16.13 usec  
TE 298.0 K  
D1 1.00000000 sec  
TD0 1  
SFO1 600.2330011 MHz  
NUC1 1H  
P0 4.00 usec  
P1 12.00 usec  
PLW1 13.00000000 W

F2 - Processing parameters  
SI 65536  
SF 600.2300161 MHz  
WDW EM  
SSB 0  
LB 0.20 Hz  
GB 0  
PC 1.00

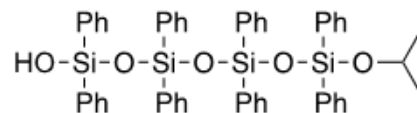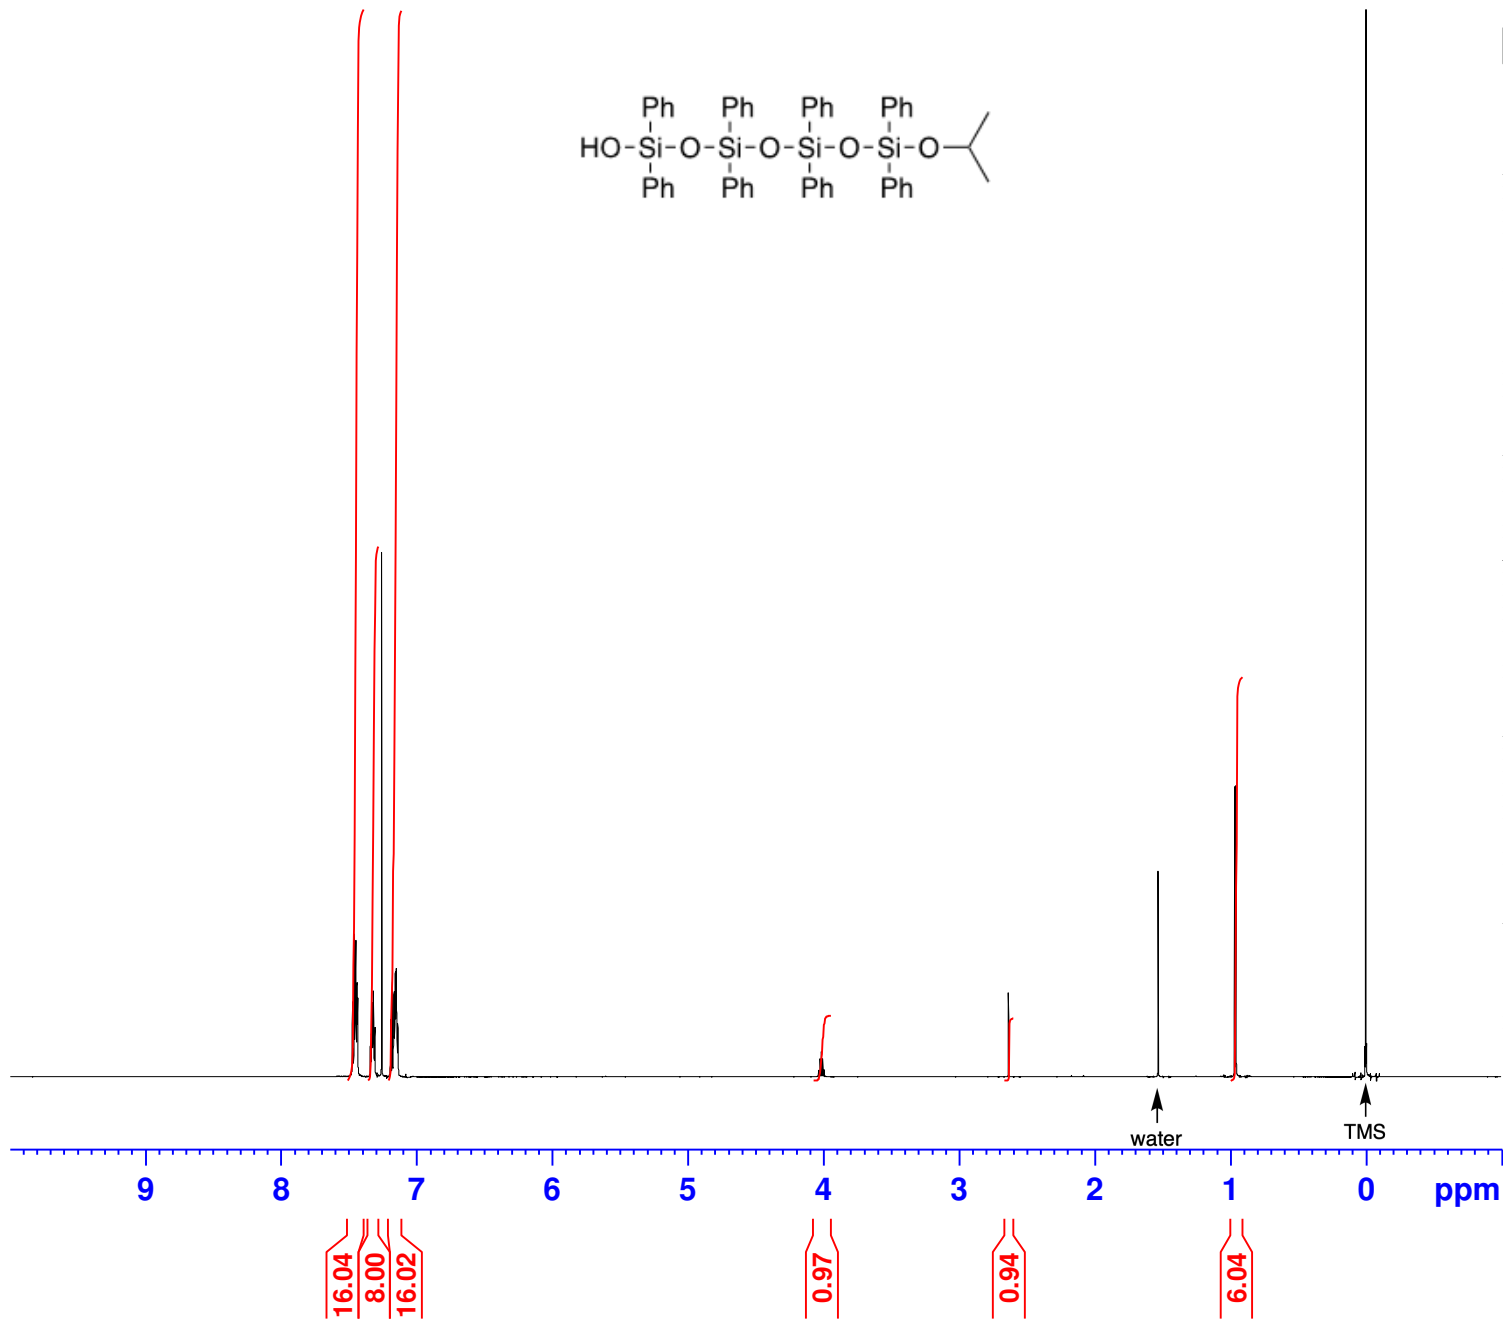

Figure S26. 7-Isopropoxyisopropoxy-1,1,3,3,5,5,7,7-octaphenyltetrasiloxan-1-ol  
<sup>13</sup>C NMR

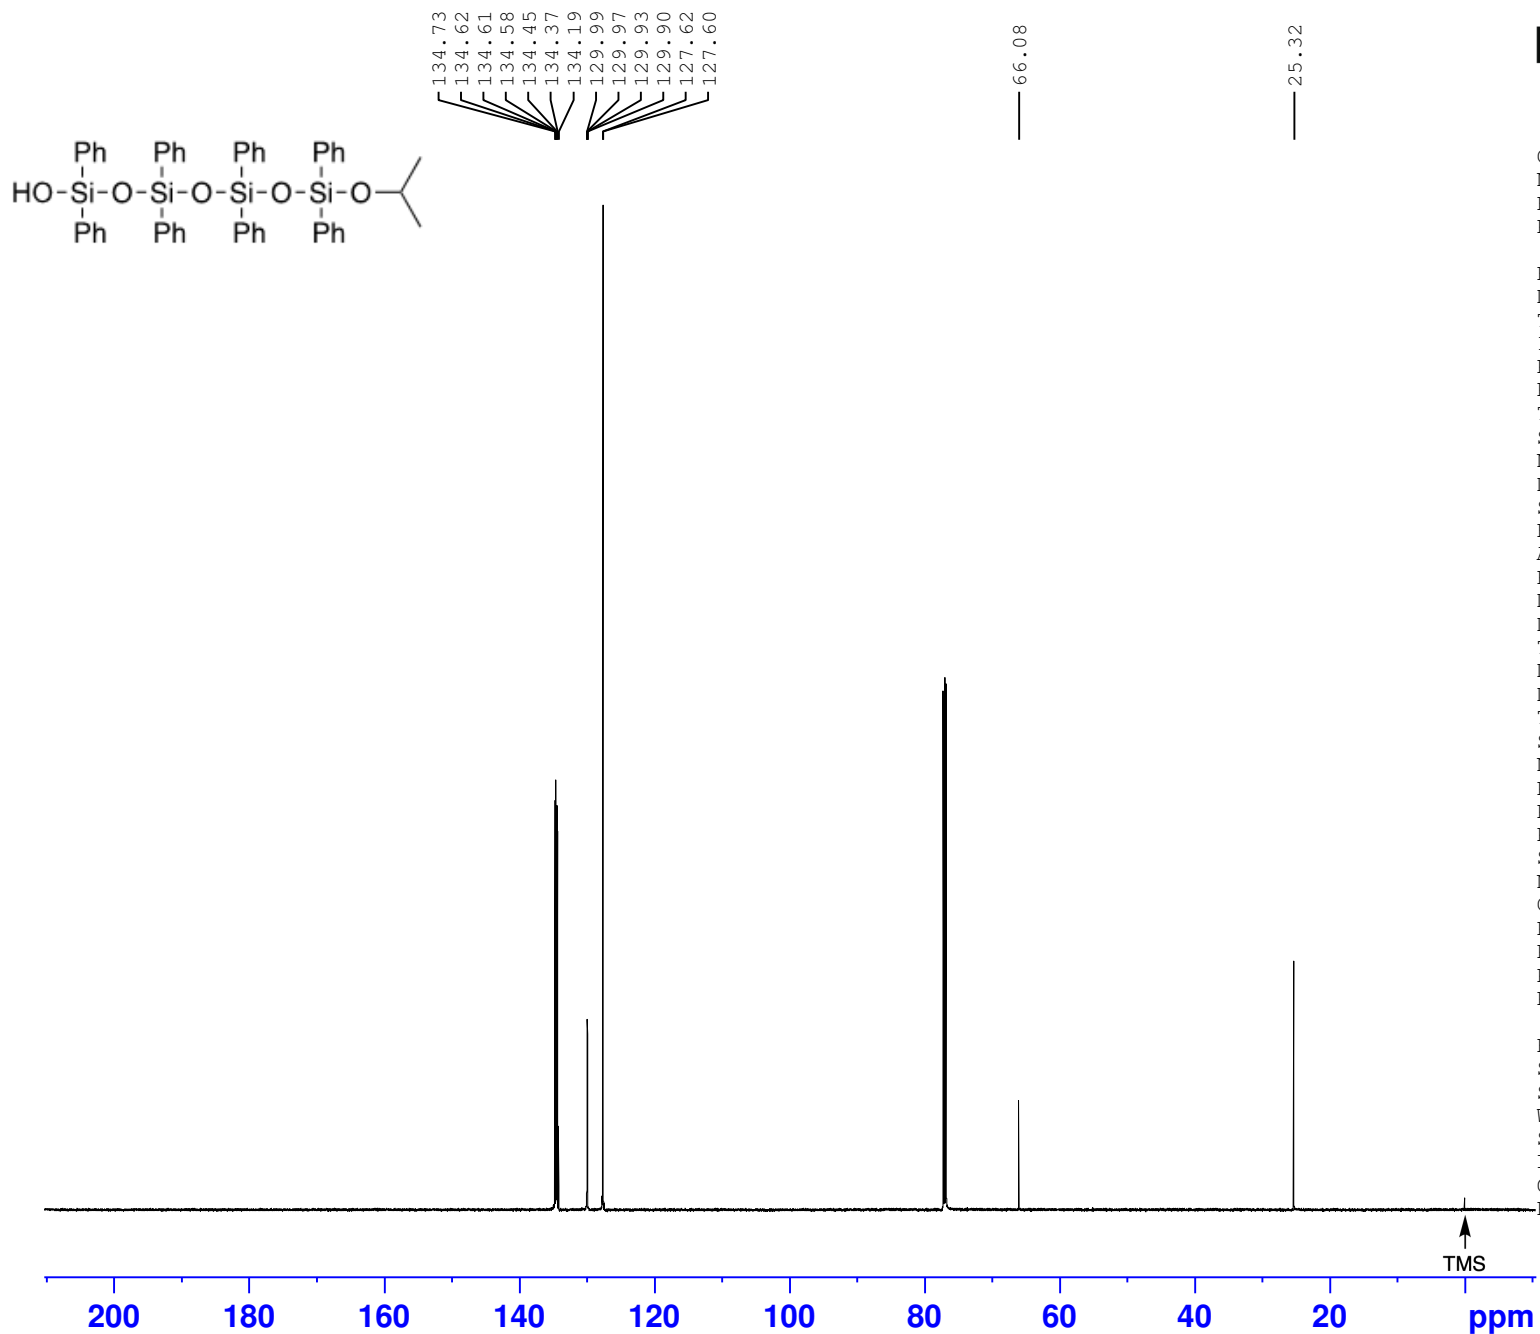

Current Data Parameters  
 NAME OMR-22-70  
 EXPNO 11  
 PROCNO 1

F2 - Acquisition Parameters  
 Date\_ 20240226  
 Time 12.28 h  
 INSTRUM spect  
 PROBHD z136133\_0001 (  
 PULPROG zgpg30  
 TD 65536  
 SOLVENT CDCl3  
 NS 64  
 DS 2  
 SWH 33333.332 Hz  
 FIDRES 1.017253 Hz  
 AQ 0.9830400 sec  
 RG 203  
 DW 15.000 usec  
 DE 18.14 usec  
 TE 300.0 K  
 D1 2.00000000 sec  
 D11 0.03000000 sec  
 TD0 1  
 SFO1 150.9178988 MHz  
 NUC1 13C  
 P0 3.33 usec  
 P1 10.00 usec  
 PLW1 48.00000000 W  
 SFO2 600.1324005 MHz  
 NUC2 1H  
 CPDPRG[2] waltz65  
 PCPD2 70.00 usec  
 PLW2 15.00000000 W  
 PLW12 0.44082001 W  
 PLW13 0.22172999 W

F2 - Processing parameters  
 SI 65536  
 SF 150.9028147 MHz  
 WDW EM  
 SSB 0  
 LB 1.00 Hz  
 GB 0  
 PC 1.40

Figure S27. 7-Isopropoxylsopropoxy-1,1,3,3,5,5,7,7-octaphenyltetrasiloxan-1-ol  
29Si NMR

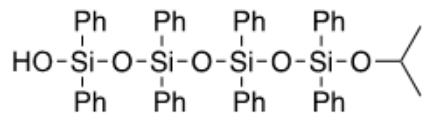

-37.64  
-40.38  
-45.72  
-46.23

TMS

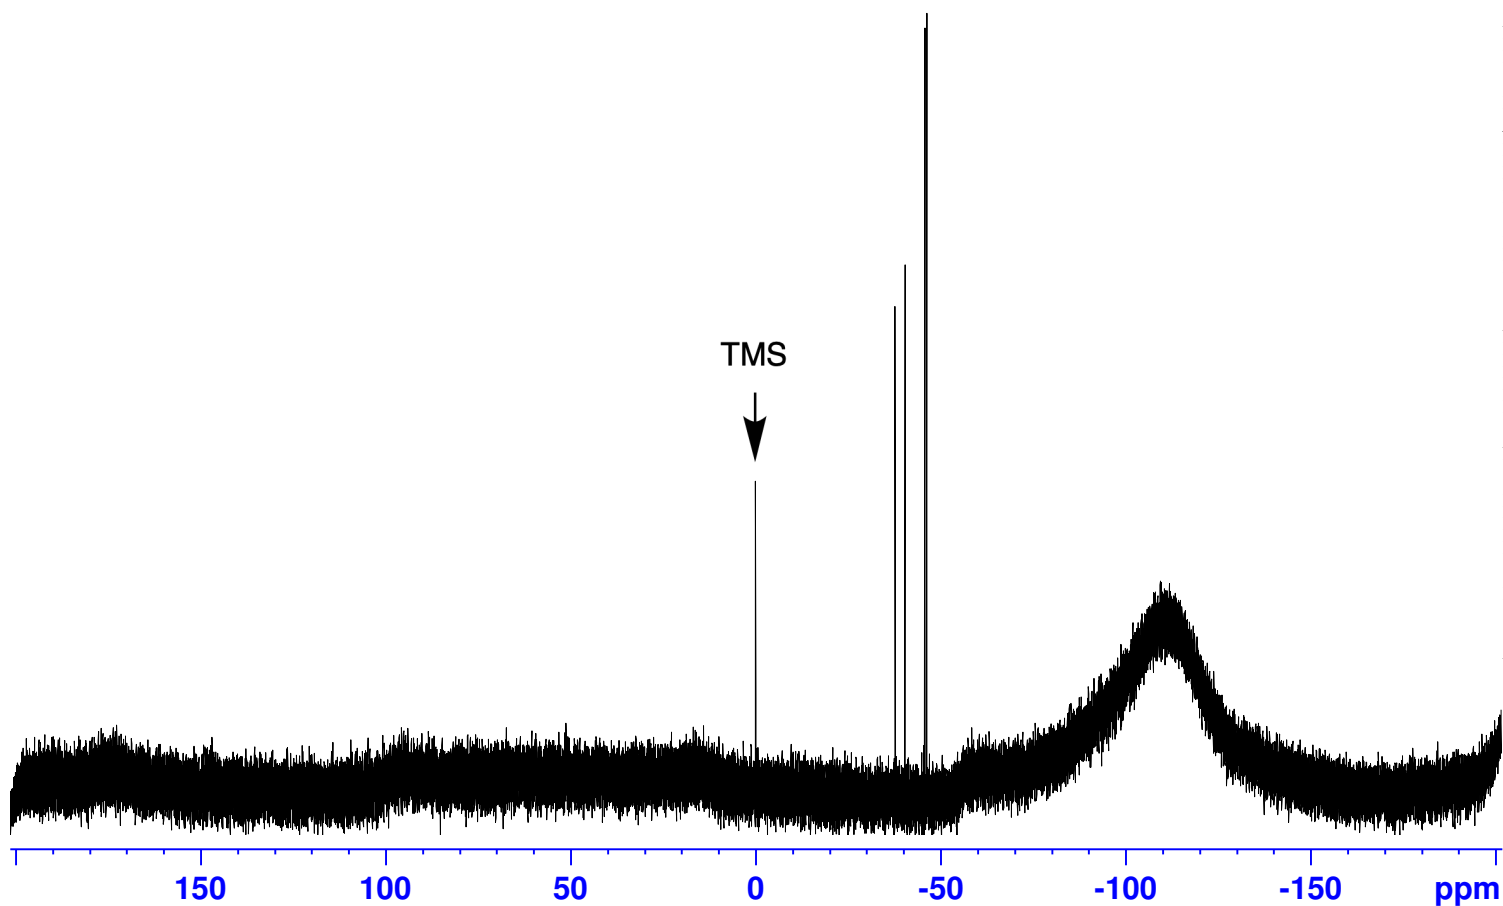

Current Data Parameters  
NAME OMR-22  
EXPNO 120  
PROCNO 1

F2 - Acquisition Parameters  
Date\_ 20210802  
Time 22.54 h  
INSTRUM spect  
PROBHD z136133\_0001 (  
PULPROG zgig30  
TD 131072  
SOLVENT CDC13  
NS 256  
DS 2  
SWH 48076.922 Hz  
FIDRES 0.733596 Hz  
AQ 1.3631488 sec  
RG 144  
DW 10.400 usec  
DE 19.38 usec  
TE 300.0 K  
D1 10.00000000 sec  
D11 0.03000000 sec  
TD0 1  
SFO1 119.2289493 MHz  
NUC1 29Si  
P0 4.00 usec  
P1 12.00 usec  
PLW1 48.00000000 W  
SFO2 600.1324005 MHz  
NUC2 1H  
CPDPRG[2] waltz65  
PCPD2 70.00 usec  
PLW2 15.00000000 W  
PLW12 0.44082001 W

F2 - Processing parameters  
SI 131072  
SF 119.2289497 MHz  
WDW EM  
SSB 0  
LB 0.30 Hz  
GB 0  
PC 1.40

Figure S28. 13-Isopropoxy-1,1,3,3,5,5-hexamethyl-7,7,9,9,11,11,13,13-octaphenylheptasiloxan-1-ol (15)  
<sup>1</sup>H NMR

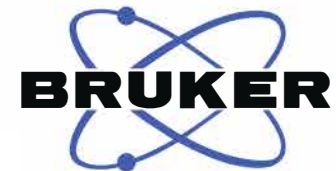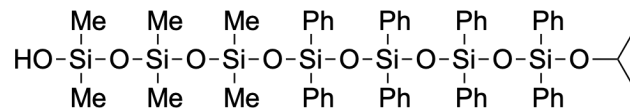

Current Data Parameters  
 NAME kawatsu-1263-(BB-d)  
 EXPNO 10  
 PROCNO 1

F2 - Acquisition Parameters  
 Date\_ 20210429  
 Time 22.05  
 INSTRUM spect  
 PROBHD 5 mm CPBBO BB-  
 PULPROG zg30  
 TD 65536  
 SOLVENT CDCl3  
 NS 8  
 DS 2  
 SWH 12019.230 Hz  
 FIDRES 0.183399 Hz  
 AQ 2.7262976 sec  
 RG 12.86  
 DW 41.600 usec  
 DE 15.65 usec  
 TE 298.0 K  
 D1 1.00000000 sec  
 TD0 1

==== CHANNEL f1 =====  
 SFO1 600.2330011 MHz  
 NUC1 1H  
 P1 12.00 usec  
 PLW1 15.50000000 W

F2 - Processing parameters  
 SI 65536  
 SF 600.2300294 MHz  
 WDW EM  
 SSB 0  
 LB 0.20 Hz  
 GB 0  
 PC 1.00

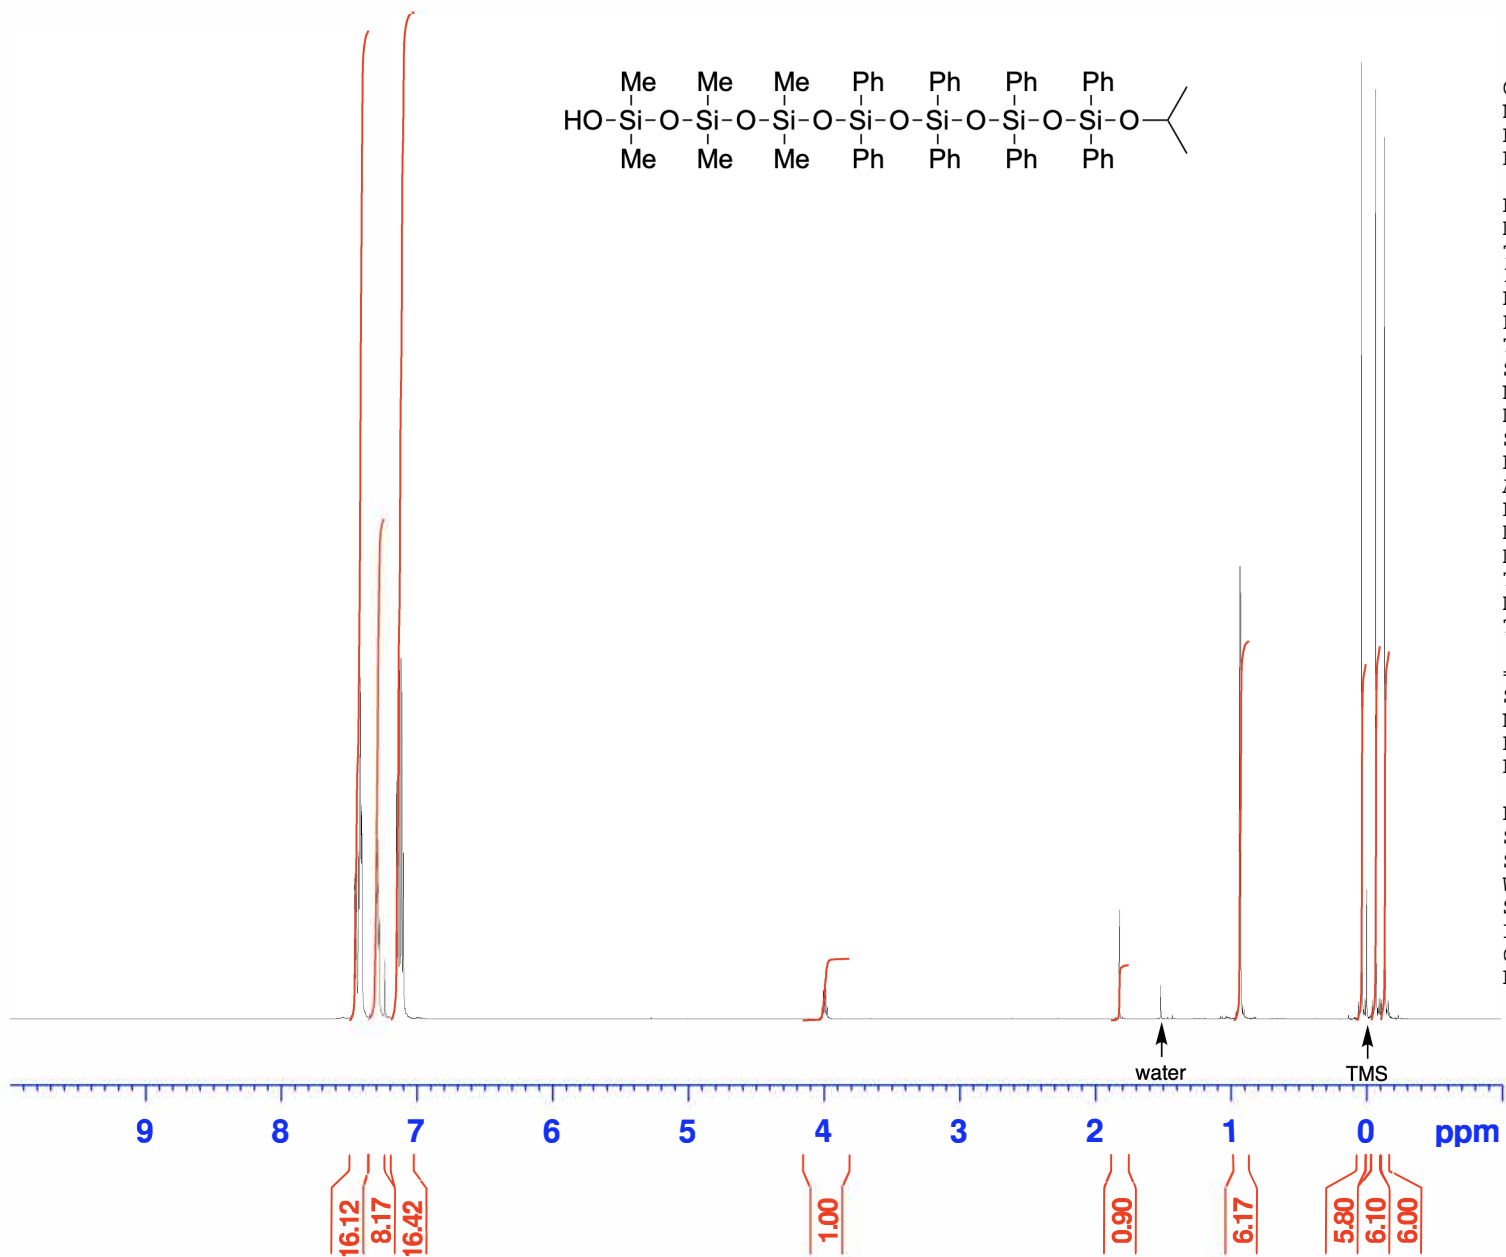

Figure S29. 13-Isopropoxy-1,1,3,3,5,5-hexamethyl-7,7,9,9,11,11,13,13-octaphenylheptasiloxan-1-ol (15)  
13C NMR

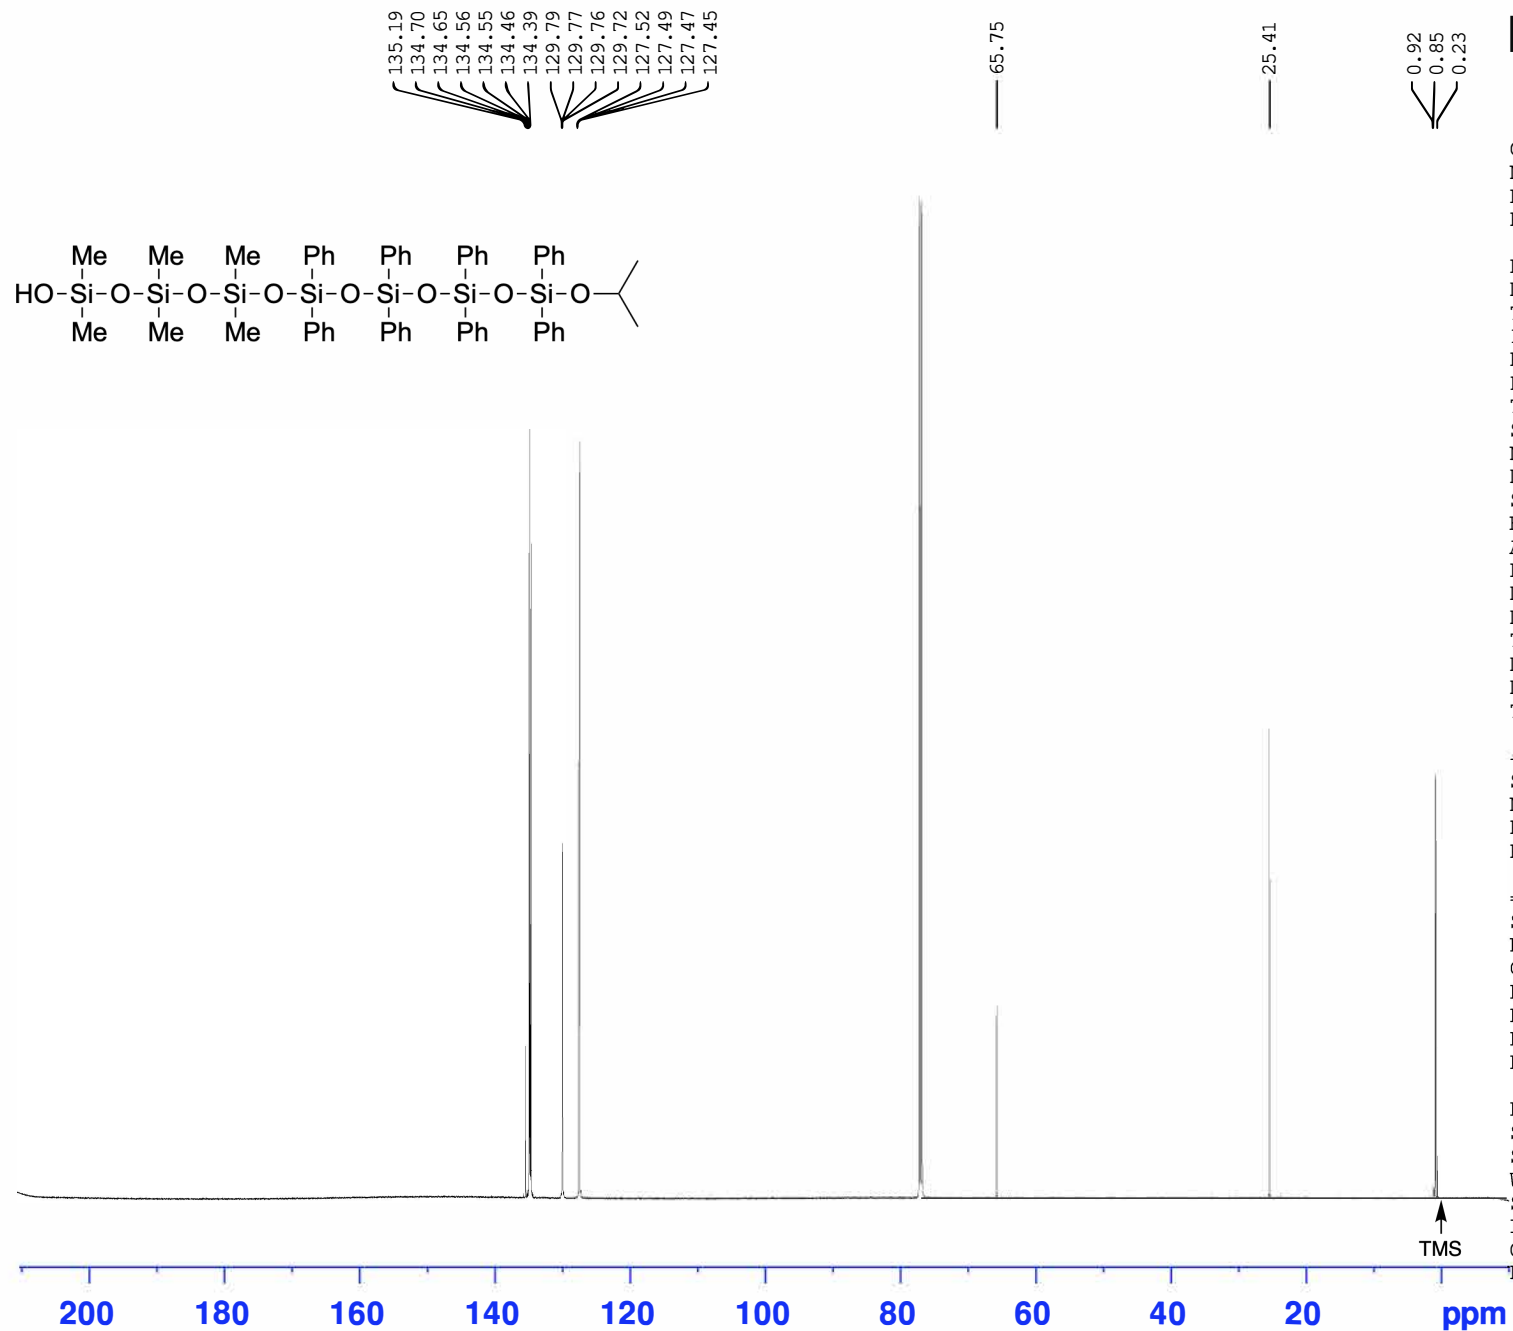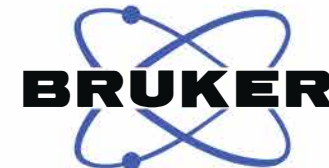

Current Data Parameters  
NAME kawatsu-1263- (BB-d)  
EXPNO 12  
PROCNO 1

F2 - Acquisition Parameters  
Date\_ 20210429  
Time 23.59  
INSTRUM spect  
PROBHD 5 mm CPBBO BB-  
PULPROG zgpg30  
TD 65536  
SOLVENT CDCl3  
NS 256  
DS 2  
SWH 33333.332 Hz  
FIDRES 0.508626 Hz  
AQ 0.9830400 sec  
RG 193.87  
DW 15.000 usec  
DE 19.62 usec  
TE 298.0 K  
D1 2.00000000 sec  
D11 0.03000000 sec  
TD0 1

===== CHANNEL f1 =====  
SFO1 150.9430468 MHz  
NUC1 13C  
P1 10.00 usec  
PLW1 35.00000000 W

===== CHANNEL f2 =====  
SFO2 600.2324009 MHz  
NUC2 1H  
CPDPRG[2] waltz65  
PCPD2 70.00 usec  
PLW2 15.50000000 W  
PLW12 0.45550999 W  
PLW13 0.22875001 W

F2 - Processing parameters  
SI 65536  
SF 150.9279600 MHz  
WDW EM  
SSB 0  
LB 1.00 Hz  
GB 0  
PC 1.40

Figure S30. 13-Isopropoxy-1,1,3,3,5,5-hexamethyl-7,7,9,9,11,11,13,13-octaphenylheptasiloxan-1-ol (15)  
29Si NMR

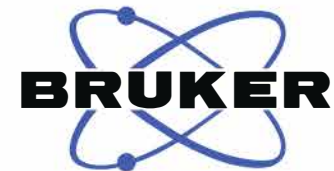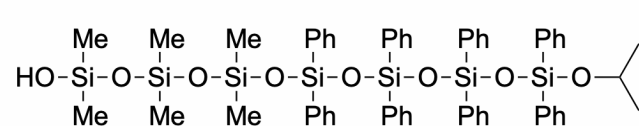

-10.73  
-20.50  
-21.02  
-41.19  
-46.37  
-46.49  
-47.52

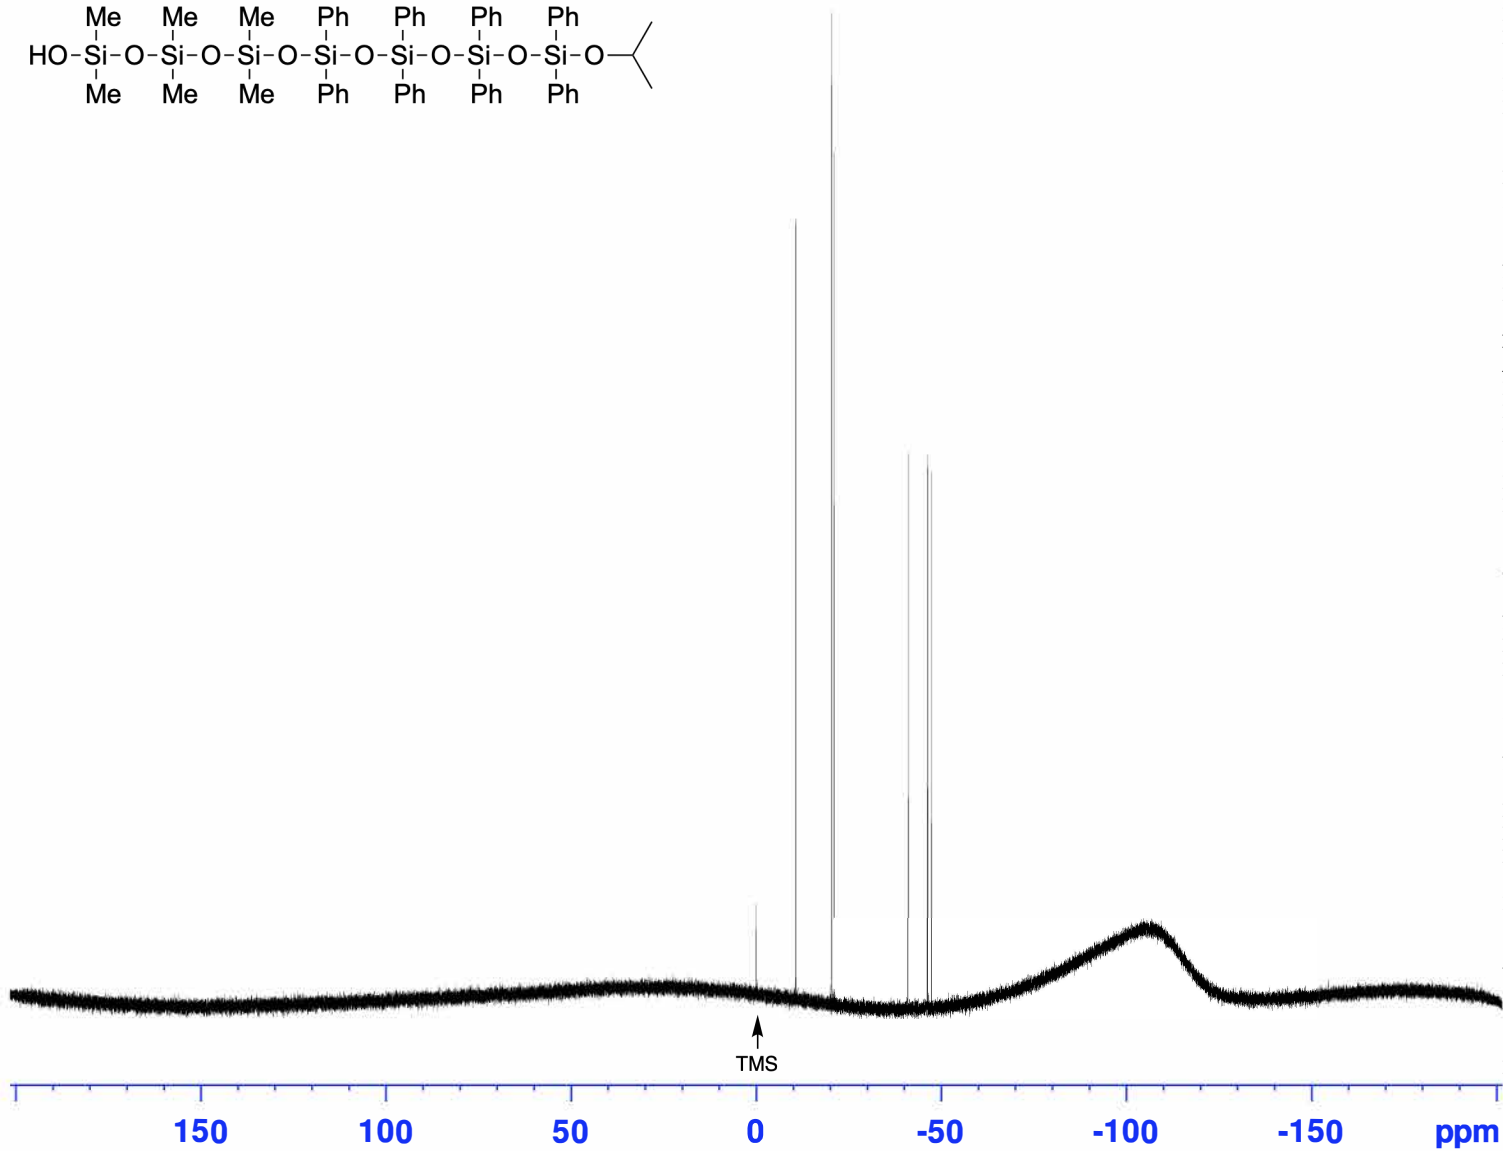

Current Data Parameters  
NAME kawatsu-1263- (BB-d)  
EXPNO 11  
PROCNO 1

F2 - Acquisition Parameters  
Date\_ 20210429  
Time 23.44  
INSTRUM spect  
PROBHD 5 mm CPBBO BB-  
PULPROG zgig30  
TD 131072  
SOLVENT CDCl3  
NS 512  
DS 2  
SWH 48076.922 Hz  
FIDRES 0.366798 Hz  
AQ 1.3631488 sec  
RG 193.87  
DW 10.400 usec  
DE 18.90 usec  
TE 298.0 K  
D1 10.00000000 sec  
D11 0.03000000 sec  
TD0 1

==== CHANNEL f1 =====  
SFO1 119.2488170 MHz  
NUC1 29Si  
P1 12.00 usec  
PLW1 44.50000000 W

==== CHANNEL f2 =====  
SFO2 600.2324009 MHz  
NUC2 1H  
CPDPRG[2] waltz65  
PCPD2 70.00 usec  
PLW2 15.50000000 W  
PLW12 0.45550999 W

F2 - Processing parameters  
SI 131072  
SF 119.2488179 MHz  
WDW EM  
SSB 0  
LB 0.30 Hz  
GB 0  
PC 1.40

Figure S31.1-Isopropoxy-9,9,9-trimethyl-1,1,3,3,5,5,7,7-octaphenylpentasiloxane (14)  
1H NMR

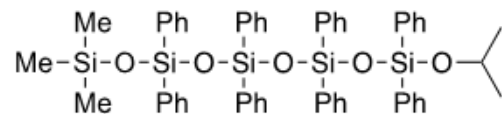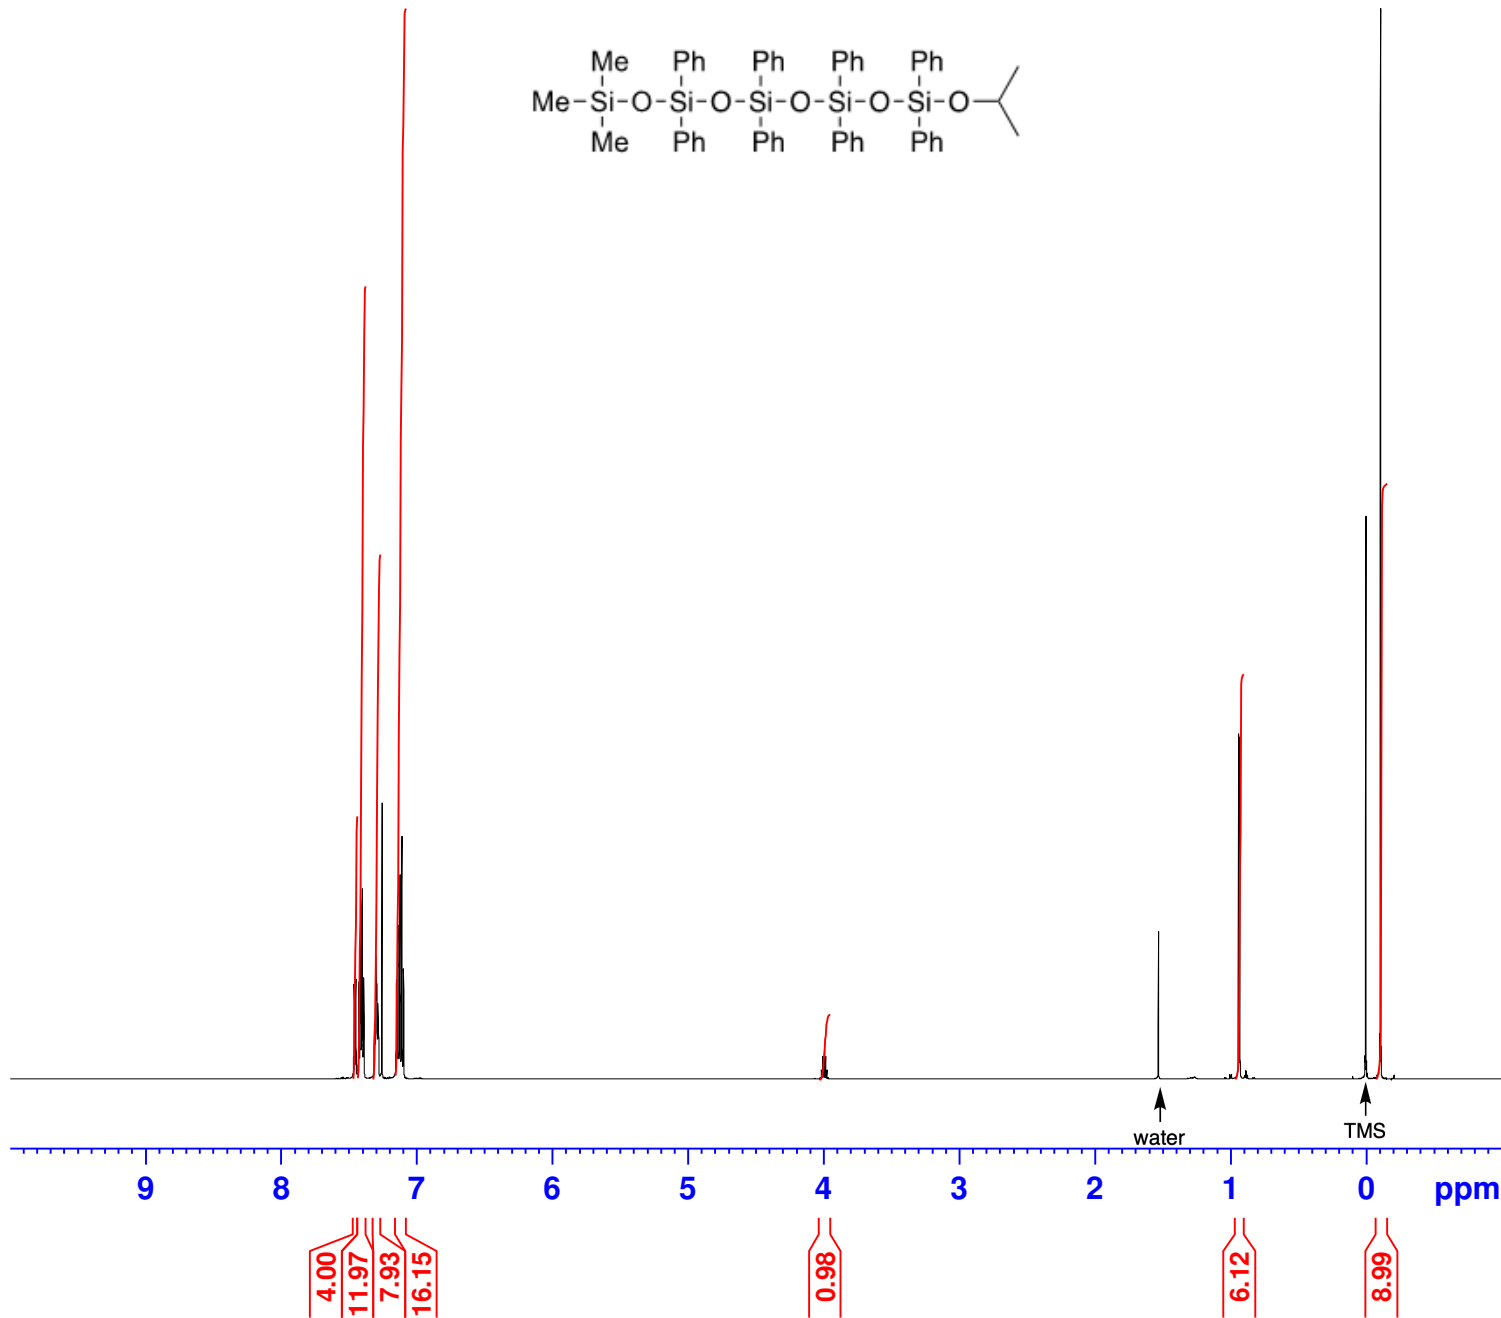

Current Data Parameters  
NAME OMR-19  
EXPNO 170  
PROCNO 1

F2 - Acquisition Parameters  
Date\_ 20210805  
Time 12.44 h  
INSTRUM spect  
PROBHD z132572\_0019 (  
PULPROG zg30  
TD 65536  
SOLVENT CDC13  
NS 32  
DS 2  
SWH 12019.230 Hz  
FIDRES 0.366798 Hz  
AQ 2.7262976 sec  
RG 24.68  
DW 41.600 usec  
DE 16.13 usec  
TE 298.0 K  
D1 1.00000000 sec  
TD0 1  
SFO1 600.2330011 MHz  
NUC1 1H  
P0 4.00 usec  
P1 12.00 usec  
PLW1 13.00000000 W

F2 - Processing parameters  
SI 65536  
SF 600.2300173 MHz  
WDW EM  
SSB 0  
LB 0.20 Hz  
GB 0  
PC 1.00



Figure S32. 1-Isopropoxy-9,9,9-trimethyl-1,1,3,3,5,5,7,7-octaphenylpentasiloxane (14)  
<sup>13</sup>C NMR

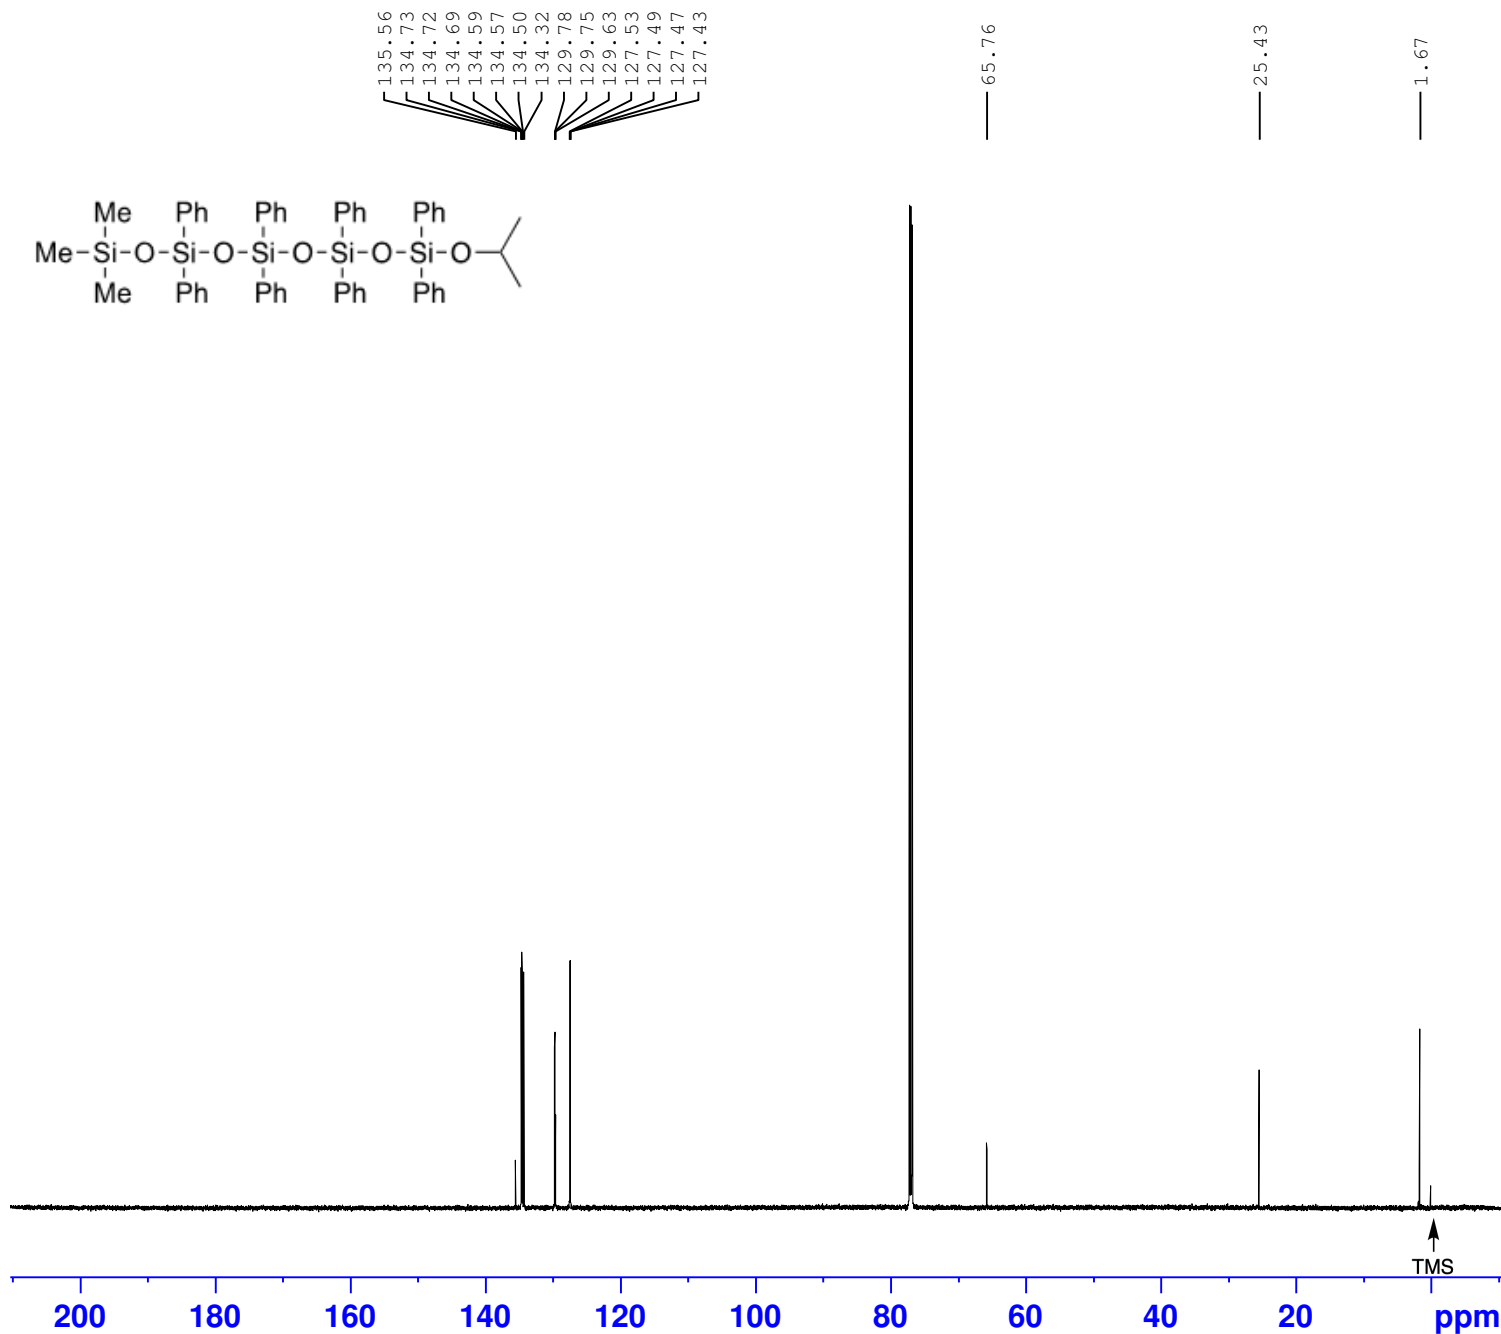

Current Data Parameters  
 NAME kawatsu-1284  
 EXPNO 11  
 PROCNO 1

F2 - Acquisition Parameters  
 Date\_ 20240226  
 Time 11.51 h  
 INSTRUM spect  
 PROBHD z136133\_0001 (  
 PULPROG zgpg30  
 TD 65536  
 SOLVENT CDCl3  
 NS 64  
 DS 2  
 SWH 33333.332 Hz  
 FIDRES 1.017253 Hz  
 AQ 0.9830400 sec  
 RG 203  
 DW 15.000 usec  
 DE 18.14 usec  
 TE 300.0 K  
 D1 2.00000000 sec  
 D11 0.03000000 sec  
 TD0 1  
 SFO1 150.9178988 MHz  
 NUC1 13C  
 P0 3.33 usec  
 P1 10.00 usec  
 PLW1 48.00000000 W  
 SFO2 600.1324005 MHz  
 NUC2 1H  
 CPDPRG[2] waltz65  
 PCPD2 70.00 usec  
 PLW2 15.00000000 W  
 PLW12 0.44082001 W  
 PLW13 0.22172999 W

F2 - Processing parameters  
 SI 65536  
 SF 150.9028106 MHz  
 WDW EM  
 SSB 0  
 LB 1.00 Hz  
 GB 0  
 PC 1.40

Figure S33. 1-Isopropoxy-9,9,9-trimethyl-1,1,3,3,5,5,7,7-octaphenylpentasiloxane (14)  
<sup>29</sup>Si NMR



Current Data Parameters  
 NAME kawatsu-1284  
 EXPNO 12  
 PROCNO 1

F2 - Acquisition Parameters  
 Date\_ 20240227  
 Time 0.53 h  
 INSTRUM spect  
 PROBHD z132572\_0019 (  
 PULPROG zgpg30  
 TD 131072  
 SOLVENT CDC13  
 NS 256  
 DS 2  
 SWH 48076.922 Hz  
 FIDRES 0.733596 Hz  
 AQ 1.3631488 sec  
 RG 193.87  
 DW 10.400 usec  
 DE 19.38 usec  
 TE 298.0 K  
 D1 10.00000000 sec  
 D11 0.03000000 sec  
 TD0 1  
 SFO1 119.2488165 MHz  
 NUC1 <sup>29</sup>Si  
 P0 4.00 usec  
 P1 12.00 usec  
 PLW1 45.00000000 W  
 SFO2 600.2324009 MHz  
 NUC2 <sup>1</sup>H  
 CPDPRG[2] waltz65  
 PCPD2 70.00 usec  
 PLW2 14.00000000 W  
 PLW12 0.41143000 W

F2 - Processing parameters  
 SI 131072  
 SF 119.2488165 MHz  
 WDW EM  
 SSB 0  
 LB 0.30 Hz  
 GB 0  
 PC 1.40

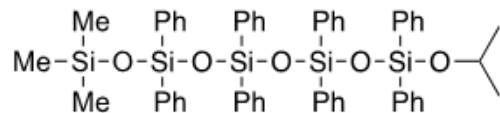

9.93

-41.22  
 -46.46  
 -46.53  
 -47.27

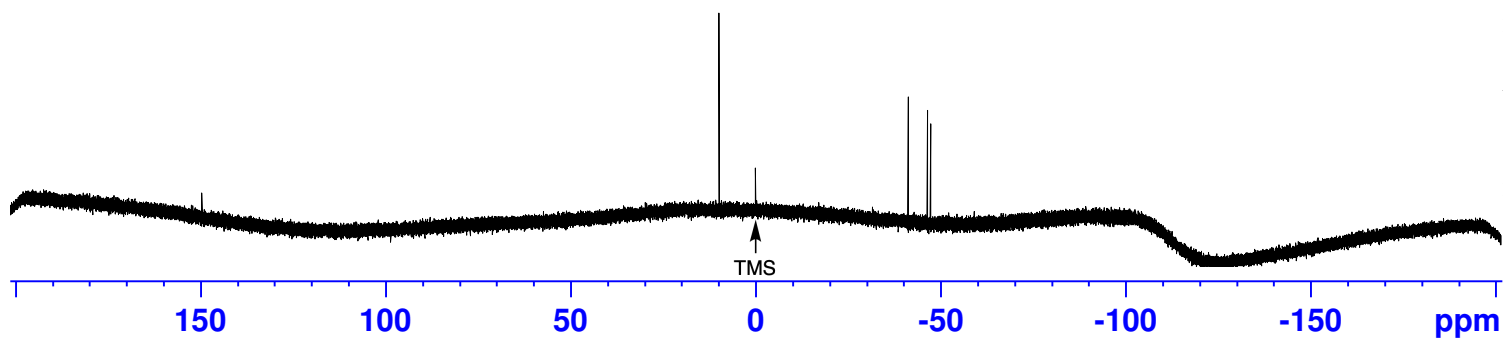

Figure S34. 1,1,1,3,3,7,7,11,11,15,15,19,19,23,23,27,27,31,31,35,35,39,39,43,43,47,47,51,51,51-Triacontamethyl-5,5,9,9,13,13,17,17,21,21,25,25,29,29,33,33,37,37,41,41,45,45,49,49-tetracosaphenylhexacosasiloxane (1)  
<sup>1</sup>H NMR

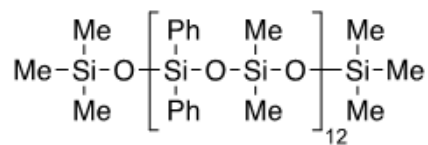

Current Data Parameters  
 NAME kawatsu-1331-(26mer-a)\_AB  
 EXPNO 10  
 PROCNO 1

F2 - Acquisition Parameters  
 Date\_ 20210803  
 Time 22.33 h  
 INSTRUM spect  
 PROBHD Z132572\_0019 (  
 PULPROG zg30  
 TD 65536  
 SOLVENT CDCl3  
 NS 8  
 DS 2  
 SWH 12019.230 Hz  
 FIDRES 0.366798 Hz  
 AQ 2.7262976 sec  
 RG 12.86  
 DW 41.600 usec  
 DE 16.13 usec  
 TE 298.0 K  
 D1 1.00000000 sec  
 TD0 1  
 SFO1 600.2330011 MHz  
 NUC1 1H  
 P0 4.00 usec  
 P1 12.00 usec  
 PLW1 13.00000000 W

F2 - Processing parameters  
 SI 65536  
 SF 600.2300459 MHz  
 WDW EM  
 SSB 0  
 LB 0.20 Hz  
 GB 0  
 PC 1.00

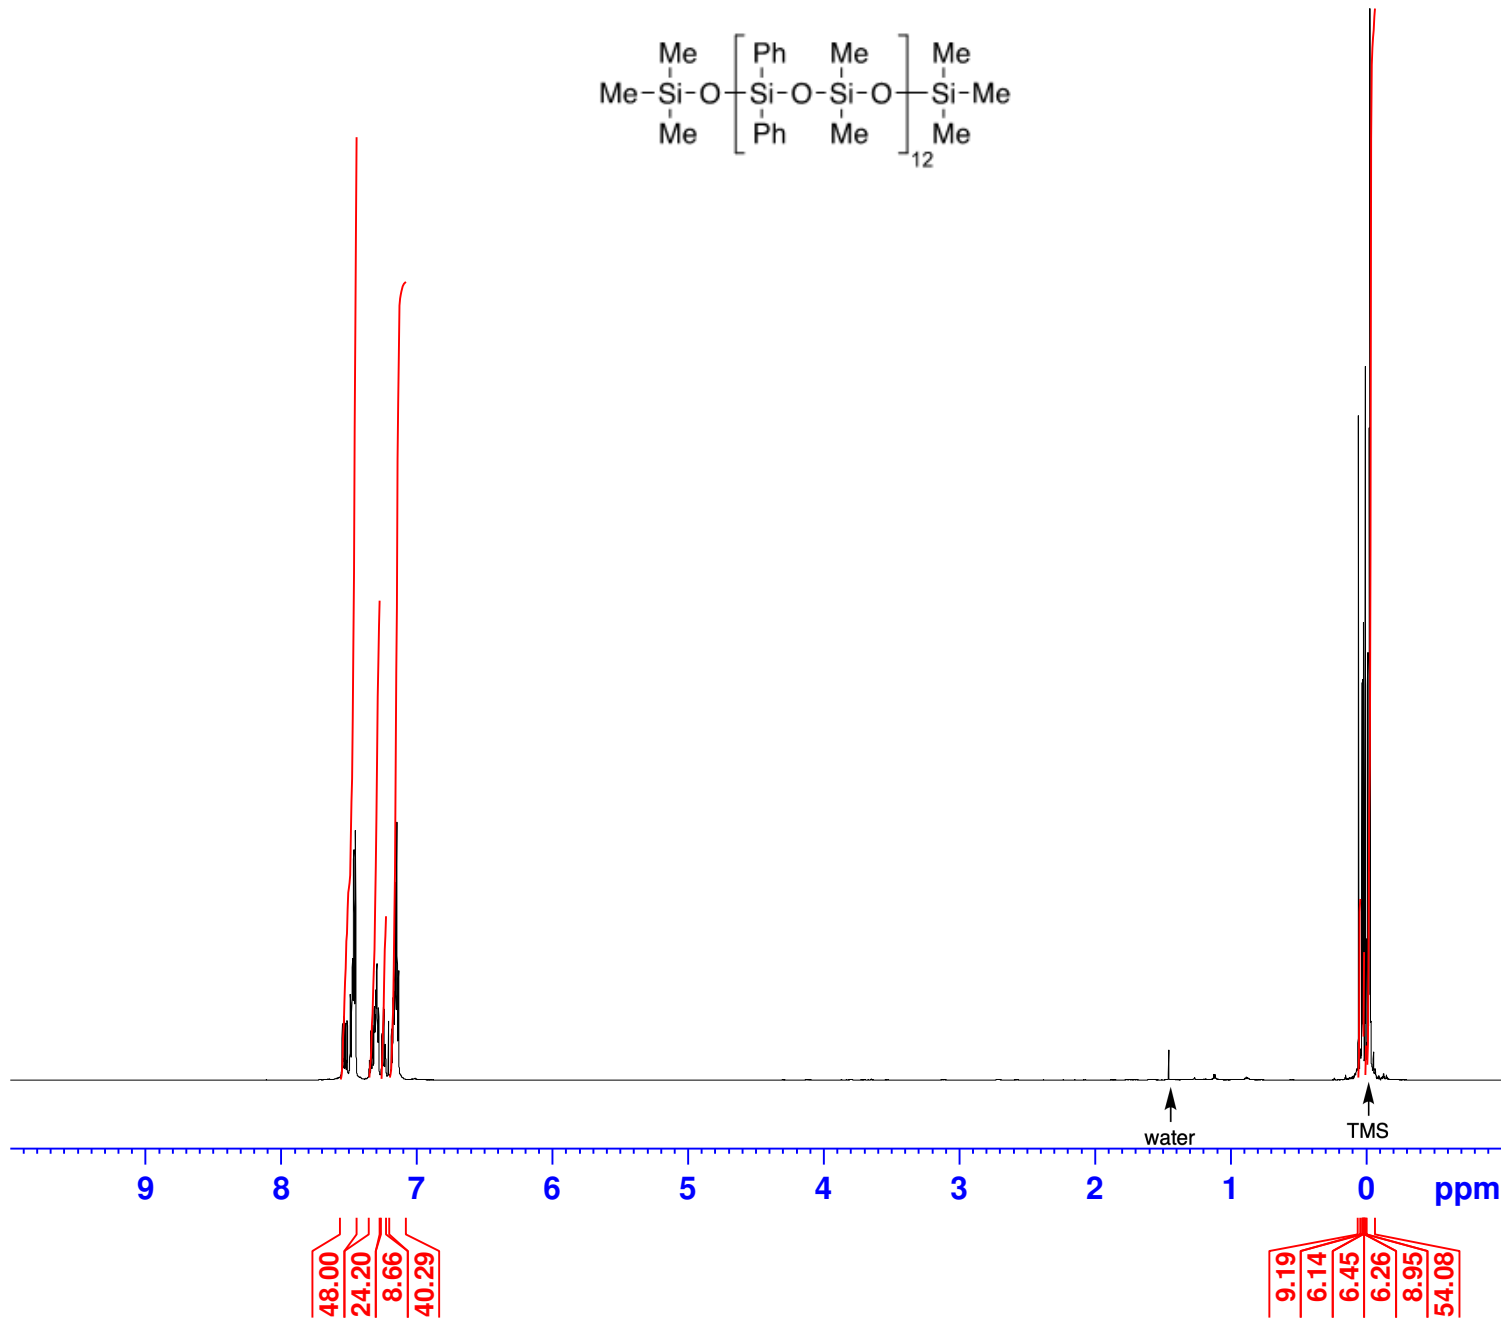

Figure S35. 1,1,1,3,3,7,7,11,11,15,15,19,19,23,23,27,27,31,31,35,35,39,39,43,43,47,47,51,51,51-Triacontamethyl-5,5,9,9,13,13,17,17,21,21,25,25,29,29,33,33,37,37,41,41,45,45,49,49-tetracosaphenylhexacosasiloxane (1)  
<sup>13</sup>C NMR

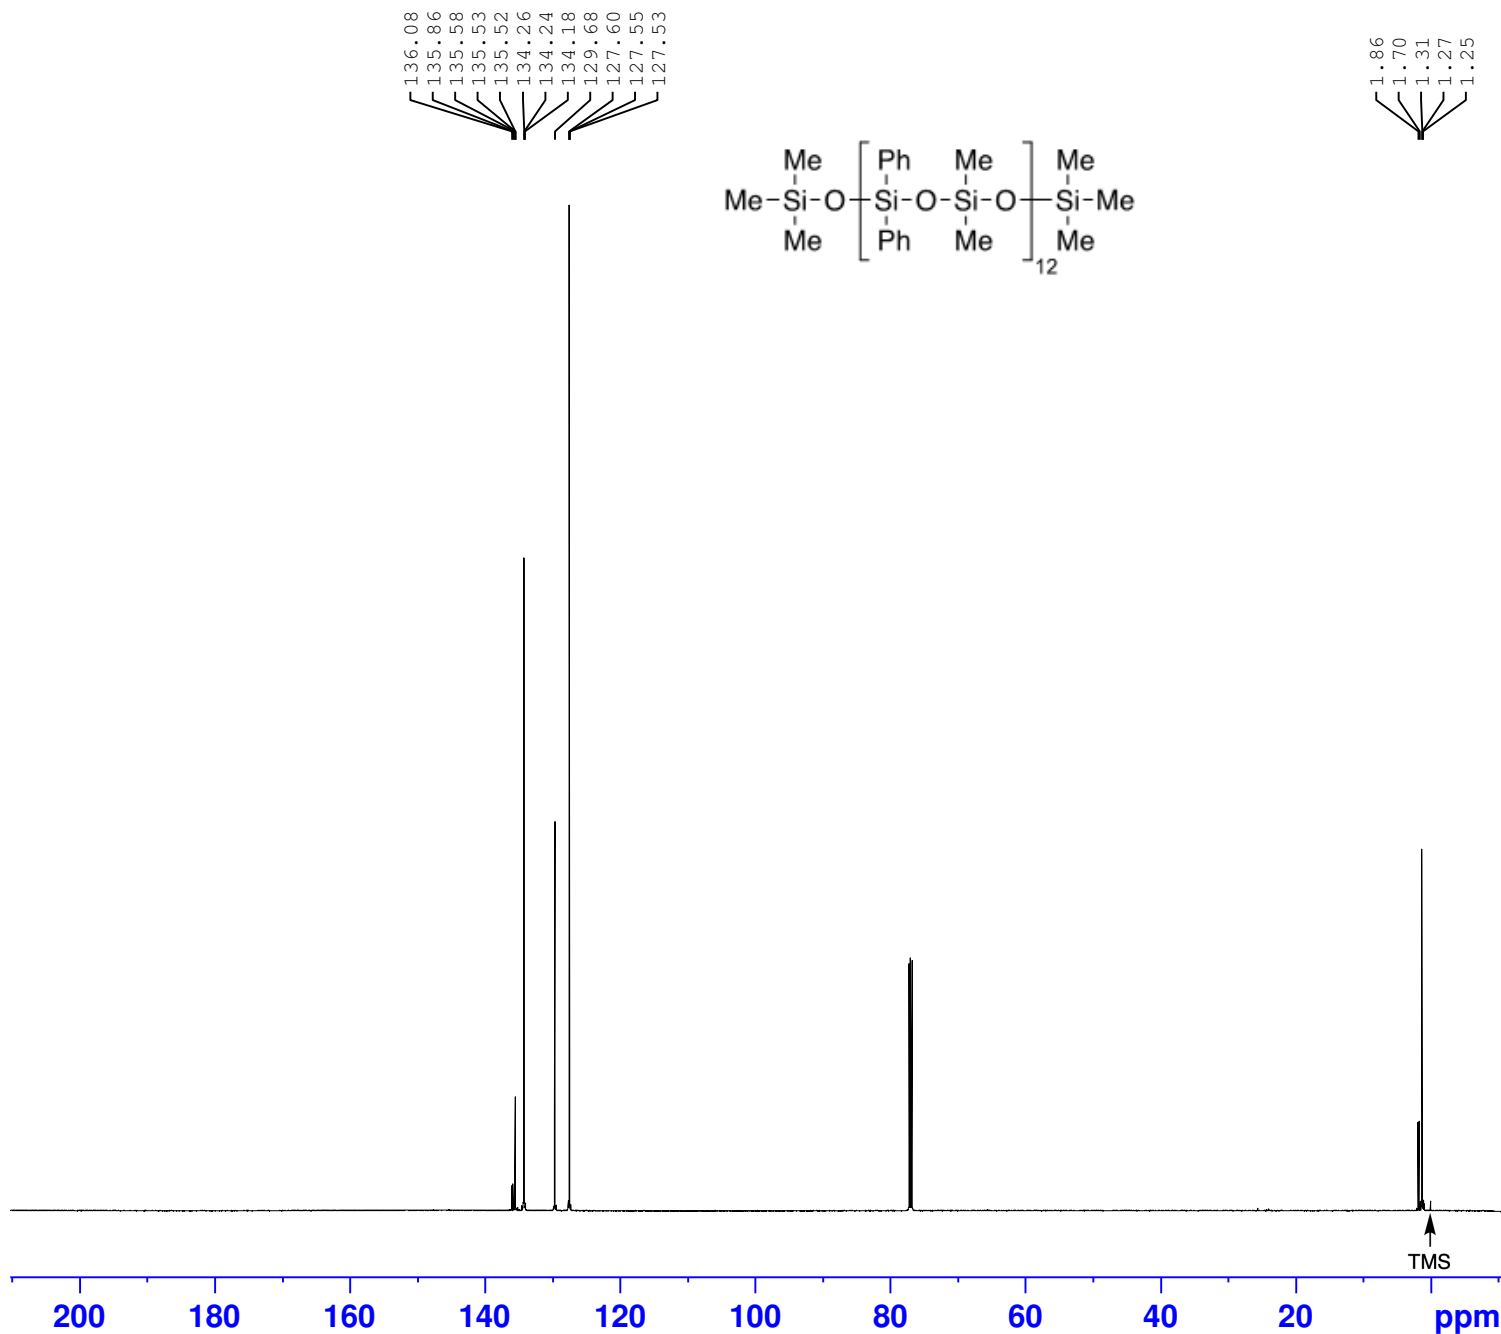

136.08  
 135.86  
 135.58  
 135.53  
 135.52  
 134.26  
 134.24  
 134.18  
 129.68  
 127.60  
 127.55  
 127.53

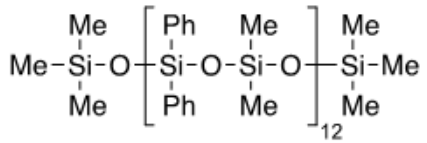

1.86  
 1.70  
 1.31  
 1.27  
 1.25

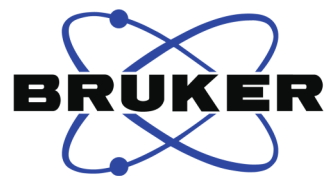

Current Data Parameters  
 NAME kawatsu-1331-(26mer-a)\_AB  
 EXPNO 12  
 PROCNO 1

F2 - Acquisition Parameters  
 Date\_ 20210804  
 Time 0.22 h  
 INSTRUM spect  
 PROBHD Z132572\_0019 (  
 PULPROG zgpg30  
 TD 65536  
 SOLVENT CDCl3  
 NS 128  
 DS 2  
 SWH 33333.332 Hz  
 FIDRES 1.017253 Hz  
 AQ 0.9830400 sec  
 RG 193.87  
 DW 15.000 usec  
 DE 18.14 usec  
 TE 298.0 K  
 D1 2.00000000 sec  
 D11 0.03000000 sec  
 TD0 1  
 SFO1 150.9430463 MHz  
 NUC1 13C  
 P0 3.33 usec  
 P1 10.00 usec  
 PLW1 34.00000000 W  
 SFO2 600.2324009 MHz  
 NUC2 1H  
 CPDPRG[2] waltz65  
 PCPD2 70.00 usec  
 PLW2 13.00000000 W  
 PLW12 0.38203999 W  
 PLW13 0.19216000 W

F2 - Processing parameters  
 SI 65536  
 SF 150.9279646 MHz  
 WDW EM  
 SSB 0  
 LB 1.00 Hz  
 GB 0  
 PC 1.40

Figure S36. 1,1,1,3,3,7,7,11,11,15,15,19,19,23,23,27,27,31,31,35,35,39,39,43,43,47,47,51,51,51-Triacontamethyl-5,5,9,9,13,13,17,17,21,21,25,25,29,29,33,33,37,37,41,41,45,45,49,49-tetracosaphenylhexacosasiloxane (1)  
<sup>29</sup>Si NMR



Current Data Parameters  
 NAME kawatsu-1331-(26mer-a)\_AB  
 EXPNO 11  
 PROCNO 1

F2 - Acquisition Parameters  
 Date\_ 20210804  
 Time 0.13 h  
 INSTRUM spect  
 PROBHD Z132572\_0019 (  
 PULPROG zgig30  
 TD 131072  
 SOLVENT CDC13  
 NS 512  
 DS 2  
 SWH 48076.922 Hz  
 FIDRES 0.733596 Hz  
 AQ 1.3631488 sec  
 RG 193.87  
 DW 10.400 usec  
 DE 19.38 usec  
 TE 298.0 K  
 D1 10.00000000 sec  
 D11 0.03000000 sec  
 TD0 1  
 SFO1 119.2488165 MHz  
 NUC1 29Si  
 P0 4.00 usec  
 P1 12.00 usec  
 PLW1 45.00000000 W  
 SFO2 600.2324009 MHz  
 NUC2 1H  
 CPDPRG[2] waltz65  
 PCPD2 70.00 usec  
 PLW2 13.00000000 W  
 PLW12 0.38203999 W

F2 - Processing parameters  
 SI 131072  
 SF 119.2488199 MHz  
 WDW EM  
 SSB 0  
 LB 0.30 Hz  
 GB 0  
 PC 1.40

9.95  
 7.54  
 -19.26  
 -19.27  
 -19.28  
 -19.29  
 -19.47  
 -20.40  
 -20.76  
 -21.67  
 -47.79  
 -48.04  
 -48.06  
 -48.08  
 -48.32

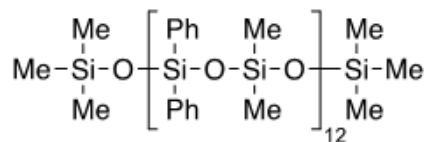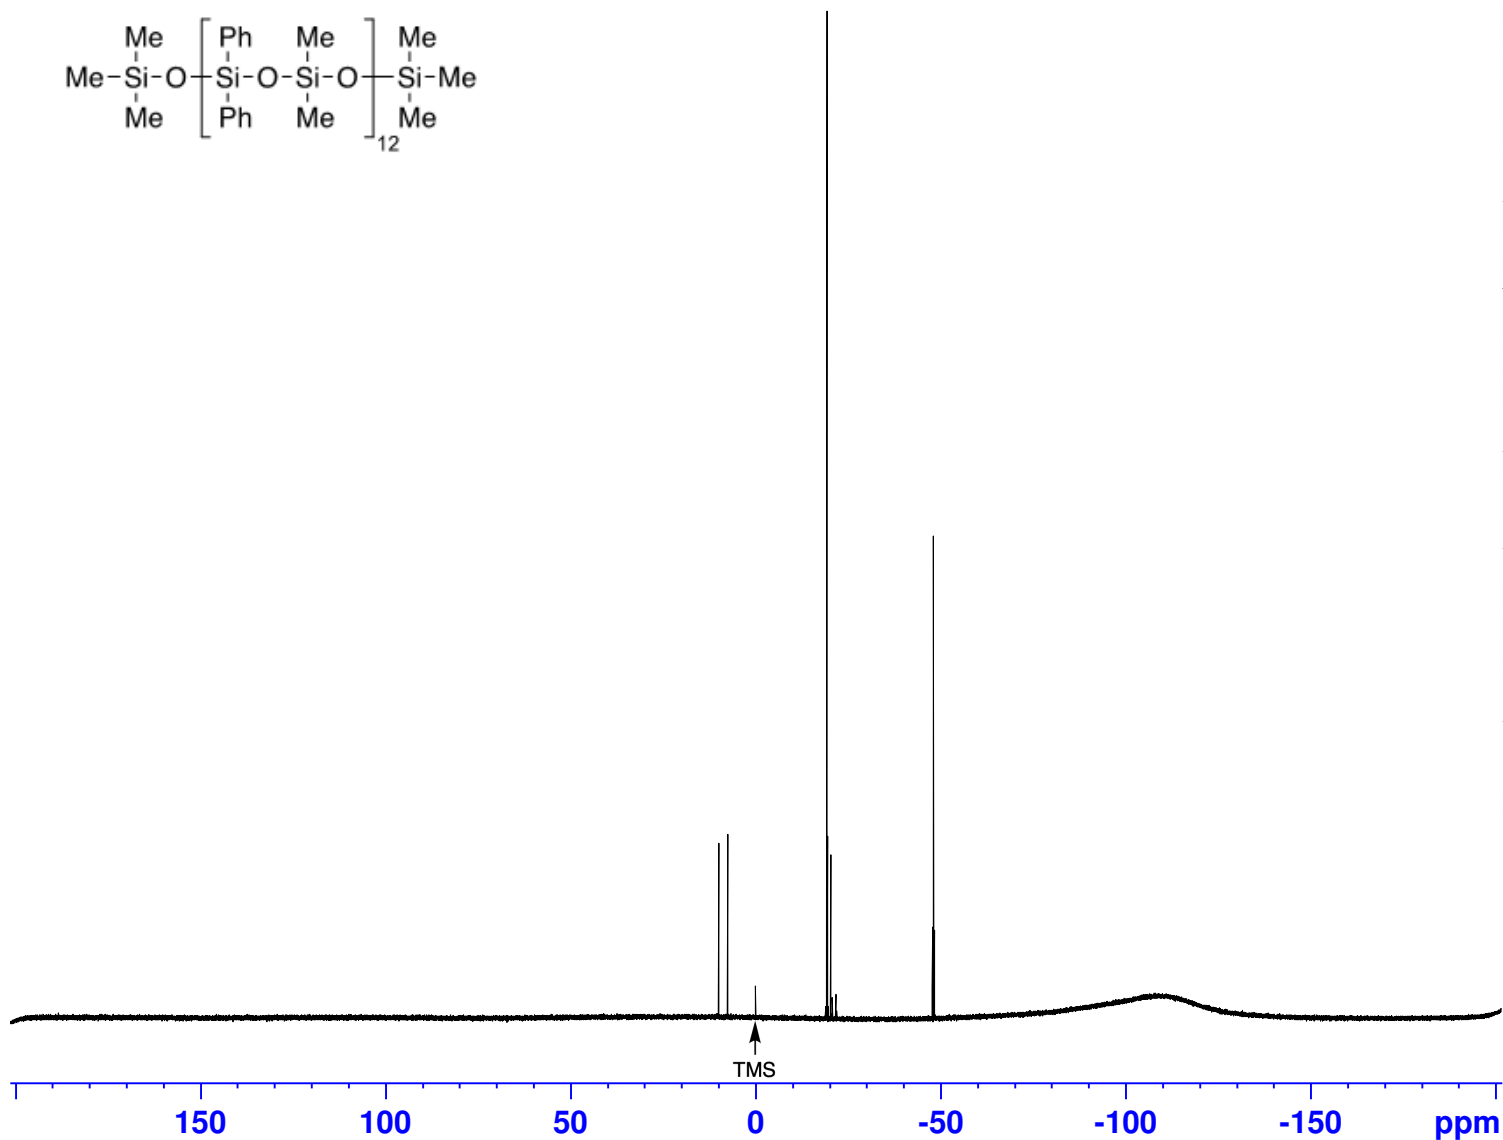

Figure S37.1, 1,1,3,3,5,5,11,11,13,13,19,19,21,21,27,27,29,29,35,35,37,37,43,43,45,45,51,51,51-Triacontamethyl-7,7,9,9,15,15,17,17,23,23,25,25,31,31,33,33,39,39,41,41,47,47,49,49-tetracosaphenylhexacosasiloxane (7)  
<sup>1</sup>H NMR

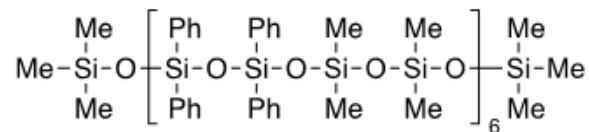

Current Data Parameters  
 NAME kawatsu-1342-data  
 EXPNO 10  
 PROCNO 1

F2 - Acquisition Parameters  
 Date\_ 20240226  
 Time 12.04 h  
 INSTRUM spect  
 PROBHD Z136133\_0001 (  
 PULPROG zg30  
 TD 65536  
 SOLVENT CDCl3  
 NS 8  
 DS 2  
 SWH 12019.230 Hz  
 FIDRES 0.366798 Hz  
 AQ 2.7262976 sec  
 RG 25.4  
 DW 41.600 usec  
 DE 16.13 usec  
 TE 298.0 K  
 D1 1.00000000 sec  
 TD0 1  
 SFO1 600.1330006 MHz  
 NUC1 1H  
 P0 4.00 usec  
 P1 12.00 usec  
 PLW1 15.00000000 W

F2 - Processing parameters  
 SI 65536  
 SF 600.1300279 MHz  
 WDW EM  
 SSB 0  
 LB 0.20 Hz  
 GB 0  
 PC 1.00

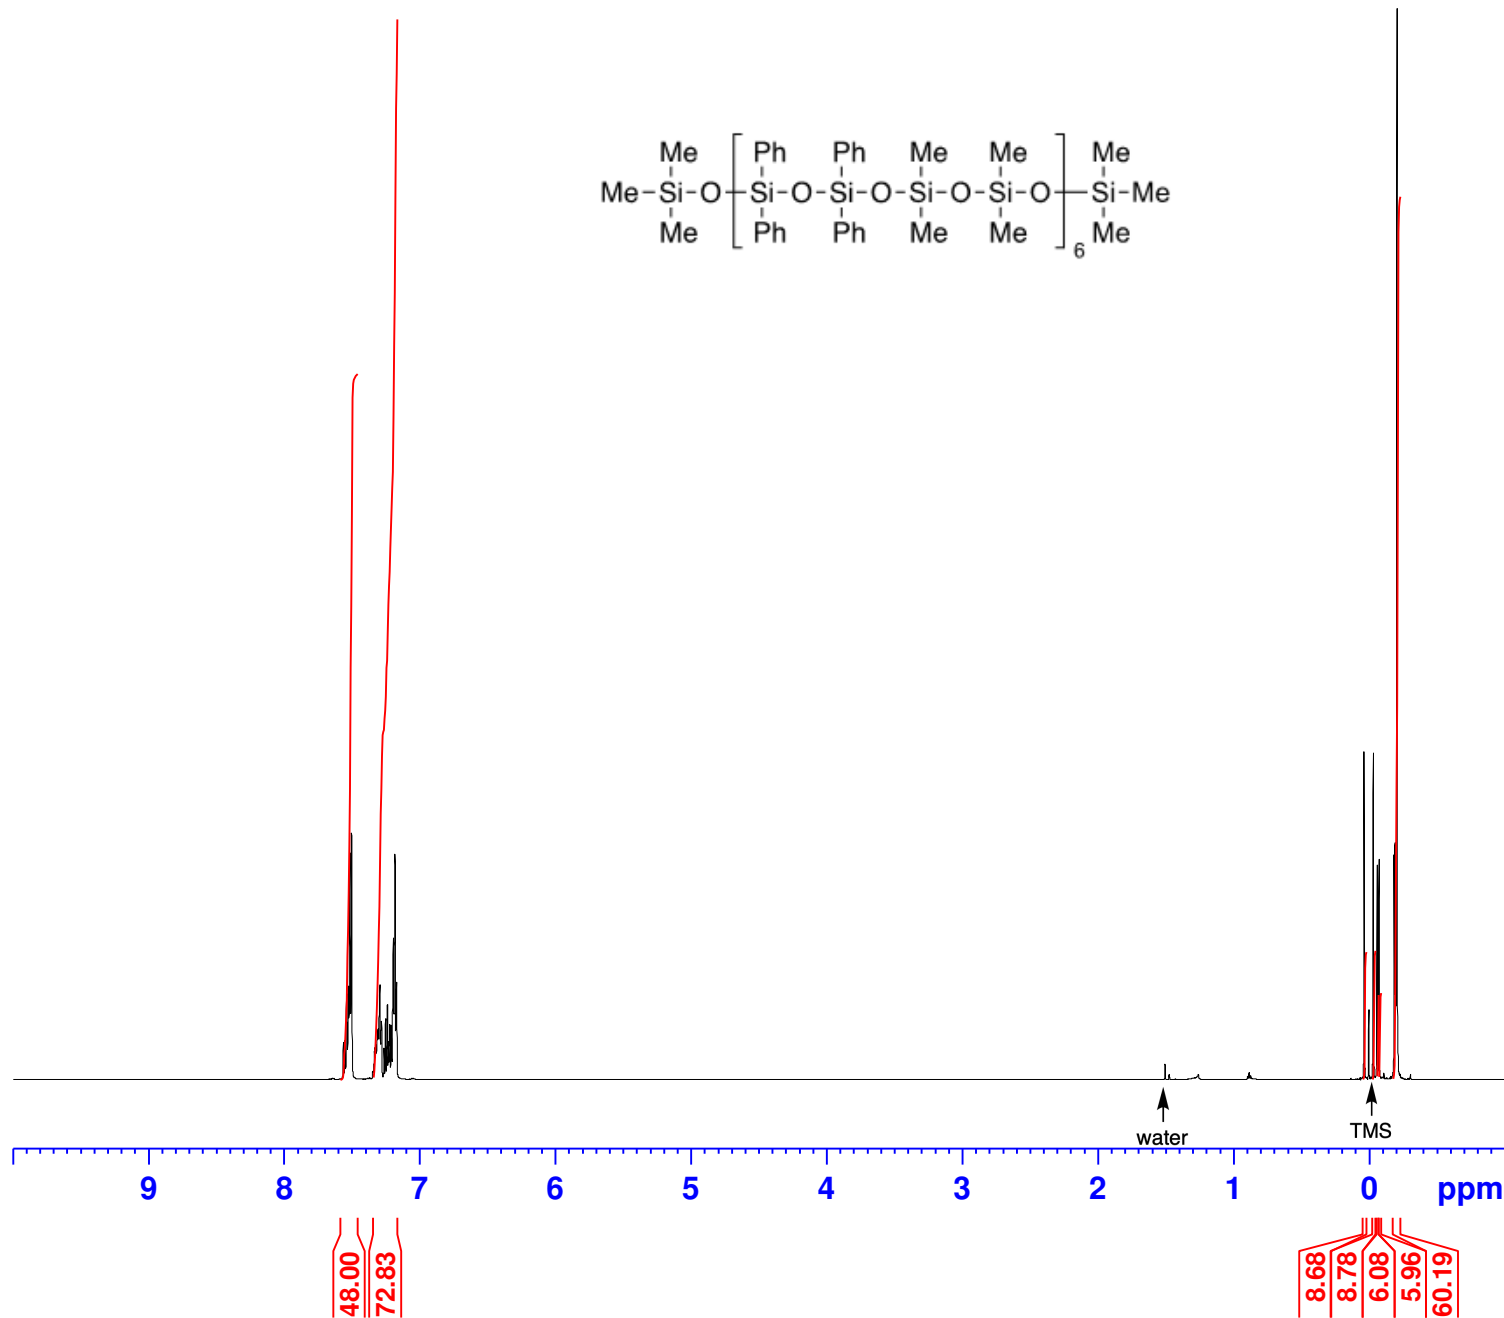

Figure S38. 1,1,1,3,3,5,5,11,11,13,13,19,19,21,21,27,27,29,29,35,35,37,37,43,43,45,45,51,51,51-Triacontamethyl-7,7,9,9,15,15,17,17,23,23,25,25,31,31,33,33,39,39,41,41,47,47,49,49-tetracosaphenylhexacosasiloxane (7)  
<sup>13</sup>C NMR

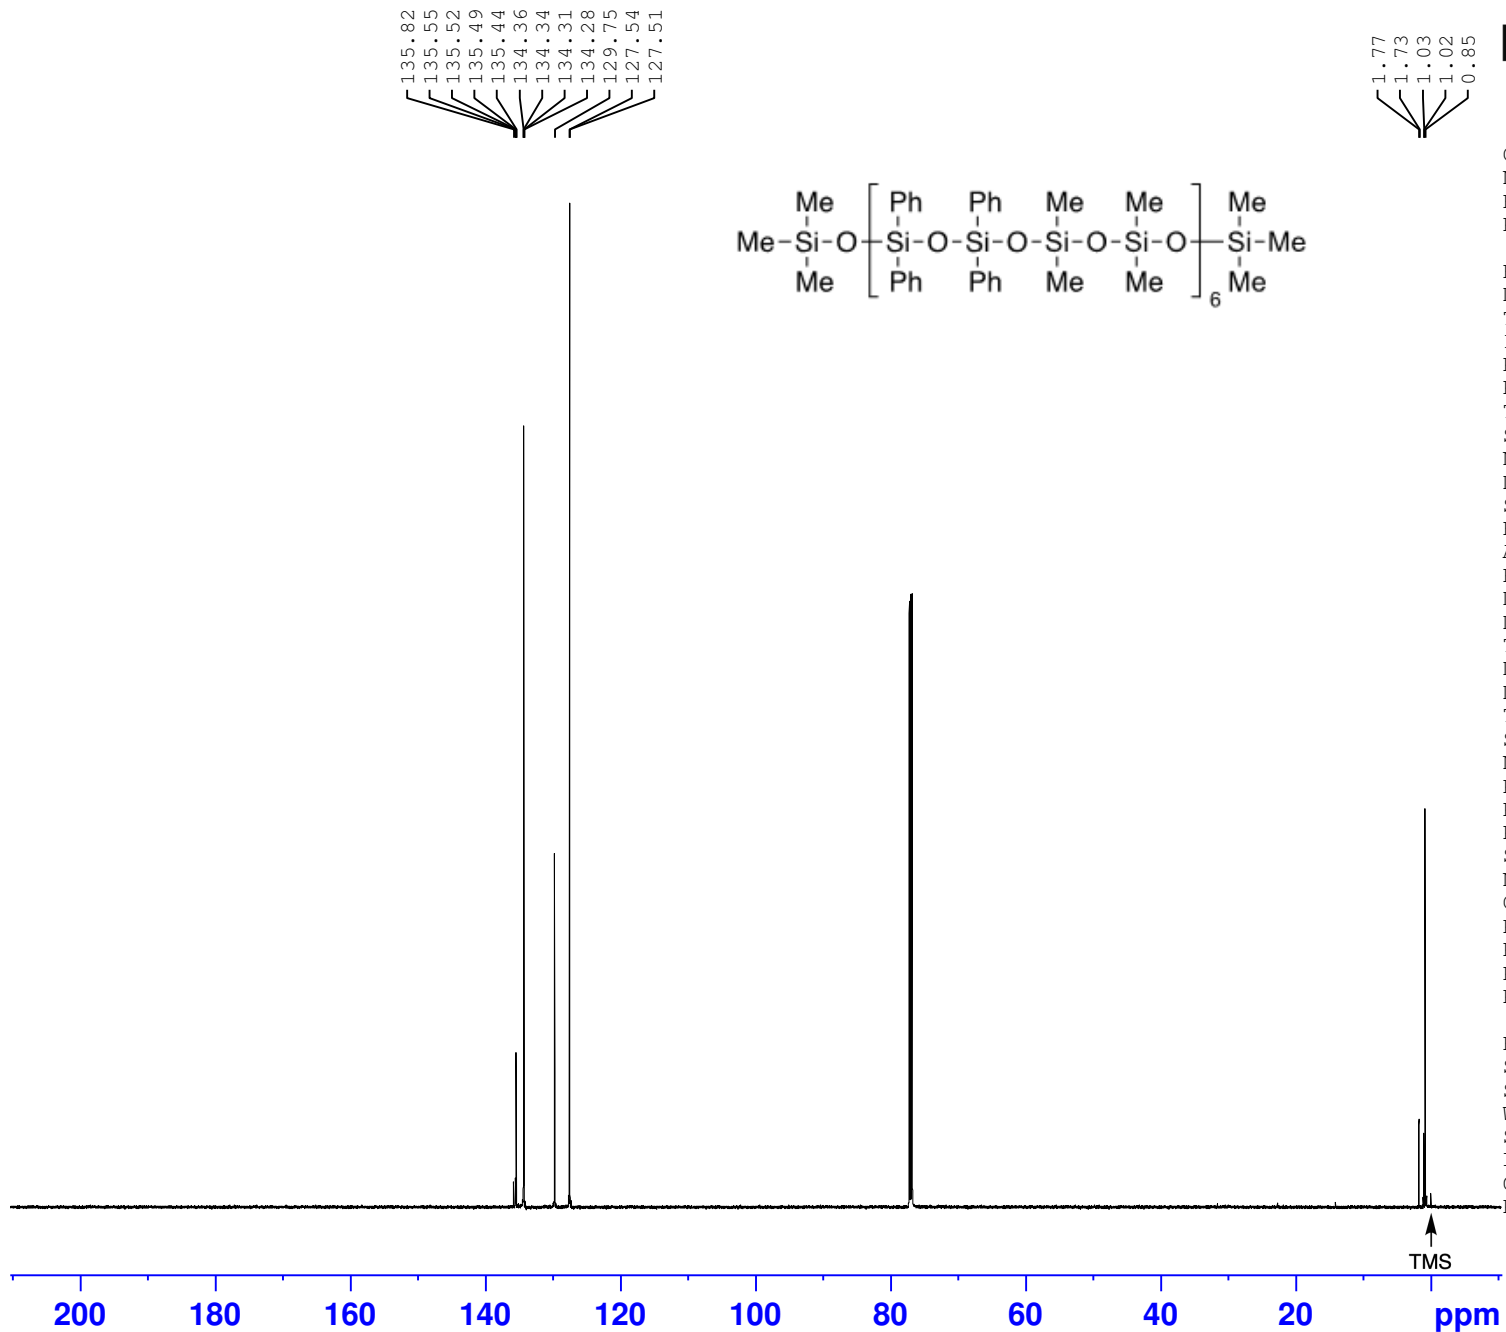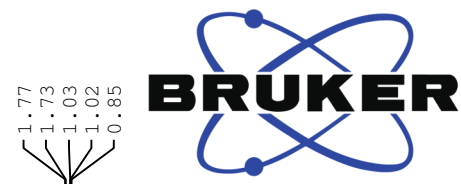

Current Data Parameters  
 NAME kawatsu-1342-data  
 EXPNO 11  
 PROCNO 1

F2 - Acquisition Parameters  
 Date\_ 20240226  
 Time 12.09 h  
 INSTRUM spect  
 PROBHD z136133\_0001 (  
 PULPROG zgpg30  
 TD 65536  
 SOLVENT CDC13  
 NS 64  
 DS 2  
 SWH 33333.332 Hz  
 FIDRES 1.017253 Hz  
 AQ 0.9830400 sec  
 RG 203  
 DW 15.000 usec  
 DE 18.14 usec  
 TE 300.0 K  
 D1 2.00000000 sec  
 D11 0.03000000 sec  
 TD0 1  
 SFO1 150.9178988 MHz  
 NUC1 13C  
 P0 3.33 usec  
 P1 10.00 usec  
 PLW1 48.00000000 W  
 SFO2 600.1324005 MHz  
 NUC2 1H  
 CPDPRG[2] waltz65  
 PCPD2 70.00 usec  
 PLW2 15.00000000 W  
 PLW12 0.44082001 W  
 PLW13 0.22172999 W

F2 - Processing parameters  
 SI 65536  
 SF 150.9028133 MHz  
 WDW EM  
 SSB 0  
 LB 1.00 Hz  
 GB 0  
 PC 1.40

Figure S39. 1,1,1,3,3,5,5,11,11,13,13,19,19,21,21,27,27,29,29,35,35,37,37,43,43,45,45,51,51,51-Triacontamethyl-7,7,9,9,15,15,17,17,23,23,25,25,31,31,33,33,39,39,41,41,47,47,49,49-tetracosaphenylhexacosasiloxane (7)  
<sup>29</sup>Si NMR



Current Data Parameters  
 NAME kawatsu-1342-(26mer-b)\_AABB  
 EXPNO 25  
 PROCNO 1

F2 - Acquisition Parameters

Date\_ 20210804  
 Time 2.13 h  
 INSTRUM spect  
 PROBHD Z132572\_0019 (  
 PULPROG zgig30  
 TD 131072  
 SOLVENT CDC13  
 NS 512  
 DS 2  
 SWH 48076.922 Hz  
 FIDRES 0.733596 Hz  
 AQ 1.3631488 sec  
 RG 193.87  
 DW 10.400 usec  
 DE 19.38 usec  
 TE 298.0 K  
 D1 10.00000000 sec  
 D11 0.03000000 sec  
 TD0 1  
 SF01 119.2488165 MHz  
 NUC1 <sup>29</sup>Si  
 P0 4.00 usec  
 P1 12.00 usec  
 PLW1 45.00000000 W  
 SF02 600.2324009 MHz  
 NUC2 <sup>1</sup>H  
 CPDPRG[2] waltz65  
 PCPD2 70.00 usec  
 PLW2 13.00000000 W  
 PLW12 0.38203999 W

F2 - Processing parameters

SI 131072  
 SF 119.2488204 MHz  
 WDW EM  
 SSB 0  
 LB 0.30 Hz  
 GB 0  
 PC 1.40

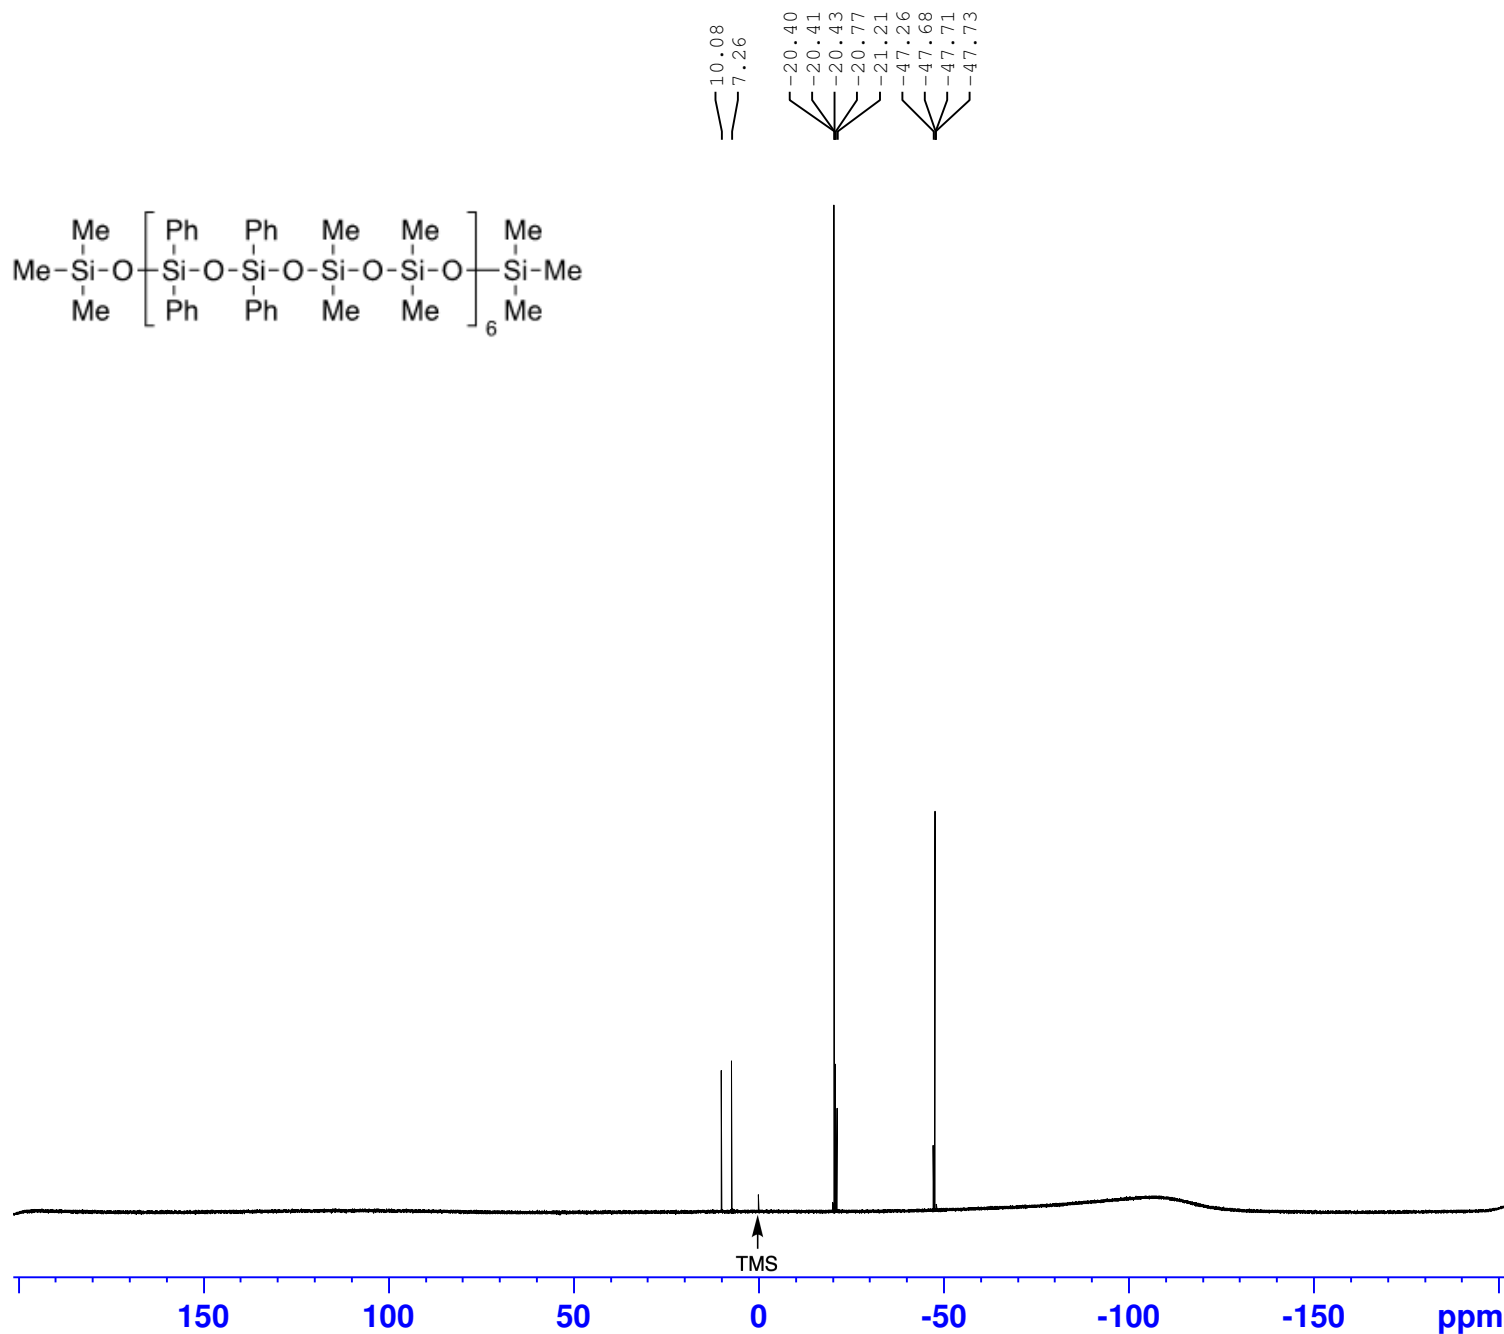



Figure S40. 1,1,1,3,3,5,5,7,7,15,15,17,17,19,19,27,27,29,29,31,31,39,39,41,41,43,43,51,51,51-Triacontamethyl-9,9,11,11,13,13,21,21,23,23,25,25,33,33,35,35,37,37,45,45,47,47,49,49-tetracosaphenylhexacosasiloxane (10)  
<sup>1</sup>H NMR

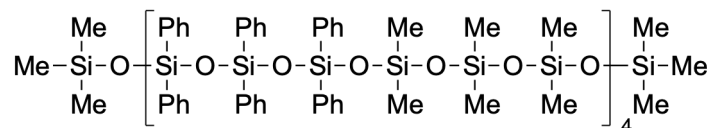

Current Data Parameters  
 NAME kawatsu-1343-(26mer-c)\_AAABBB  
 EXPNO 33  
 PROCNO 1

F2 - Acquisition Parameters  
 Date\_ 20210804  
 Time 2.16 h  
 INSTRUM spect  
 PROBHD z132572\_0019 (  
 PULPROG zg30  
 TD 65536  
 SOLVENT CDC13  
 NS 8  
 DS 2  
 SWH 12019.230 Hz  
 FIDRES 0.366798 Hz  
 AQ 2.7262976 sec  
 RG 17.4  
 DW 41.600 usec  
 DE 16.13 usec  
 TE 298.0 K  
 D1 1.00000000 sec  
 TD0 1  
 SFO1 600.2330011 MHz  
 NUC1 1H  
 PO 4.00 usec  
 P1 12.00 usec  
 PLW1 13.00000000 W

F2 - Processing parameters  
 SI 65536  
 SF 600.2300409 MHz  
 WDW EM  
 SSB 0  
 LB 0.20 Hz  
 GB 0  
 PC 1.00

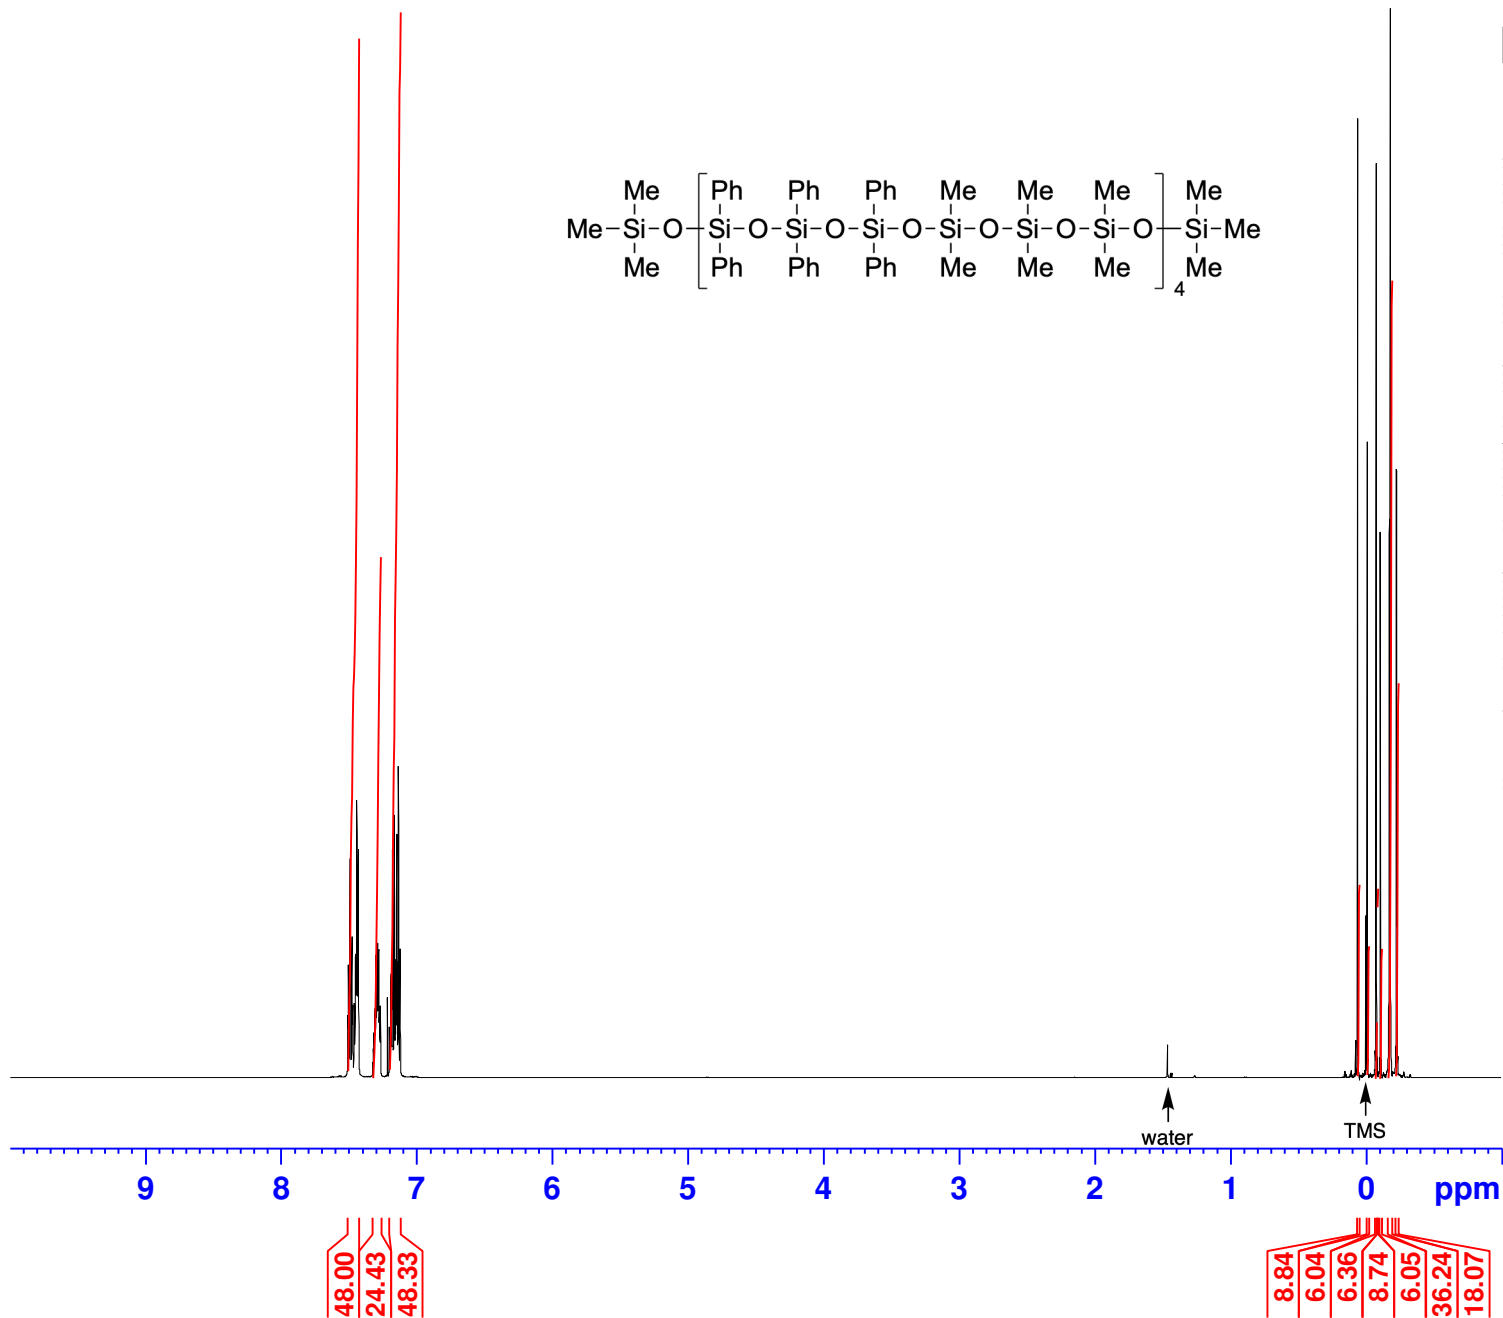

Figure S41. 1,1,1,3,3,5,5,7,7,15,15,17,17,19,19,27,27,29,29,31,31,39,39,41,41,43,43,51,51,51-Triacontamethyl-9,9,11,11,13,13,21,21,23,23,25,25,33,33,35,35,37,37,45,45,47,47,49,49-tetracosaphenylhexacosasiloxane (10)  
<sup>13</sup>C NMR

135.62  
 135.33  
 135.29  
 135.28  
 135.00  
 134.97  
 134.95  
 134.52  
 134.50  
 134.48  
 134.38  
 134.35  
 134.31  
 129.78  
 129.66  
 127.50  
 127.46

1.79  
 1.69  
 1.12  
 0.97  
 0.94  
 0.93



Current Data Parameters  
 NAME kawatsu-1343-(26mer-c)\_AAABBB  
 EXPNO 35  
 PROCNO 1

F2 - Acquisition Parameters  
 Date\_ 20210804  
 Time 4.03 h  
 INSTRUM spect  
 PROBHD z132572\_0019 (  
 PULPROG zgpg30  
 TD 65536  
 SOLVENT CDC13  
 NS 128  
 DS 2  
 SWH 33333.332 Hz  
 FIDRES 1.017253 Hz  
 AQ 0.9830400 sec  
 RG 193.87  
 DW 15.000 usec  
 DE 18.14 usec  
 TE 298.0 K  
 D1 2.00000000 sec  
 D11 0.03000000 sec  
 TD0 1  
 SFO1 150.9430463 MHz  
 NUC1 13C  
 P0 3.33 usec  
 P1 10.00 usec  
 PLW1 34.00000000 W  
 SFO2 600.2324009 MHz  
 NUC2 1H  
 CPDPRG[2] waltz65  
 PCPD2 70.00 usec  
 PLW2 13.00000000 W  
 PLW12 0.38203999 W  
 PLW13 0.19216000 W

F2 - Processing parameters  
 SI 65536  
 SF 150.9279629 MHz  
 WDW EM  
 SSB 0  
 LB 1.00 Hz  
 GB 0  
 PC 1.40

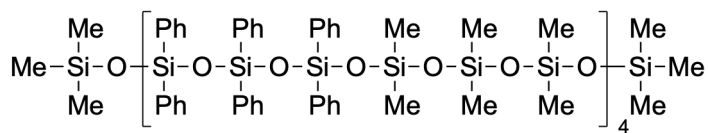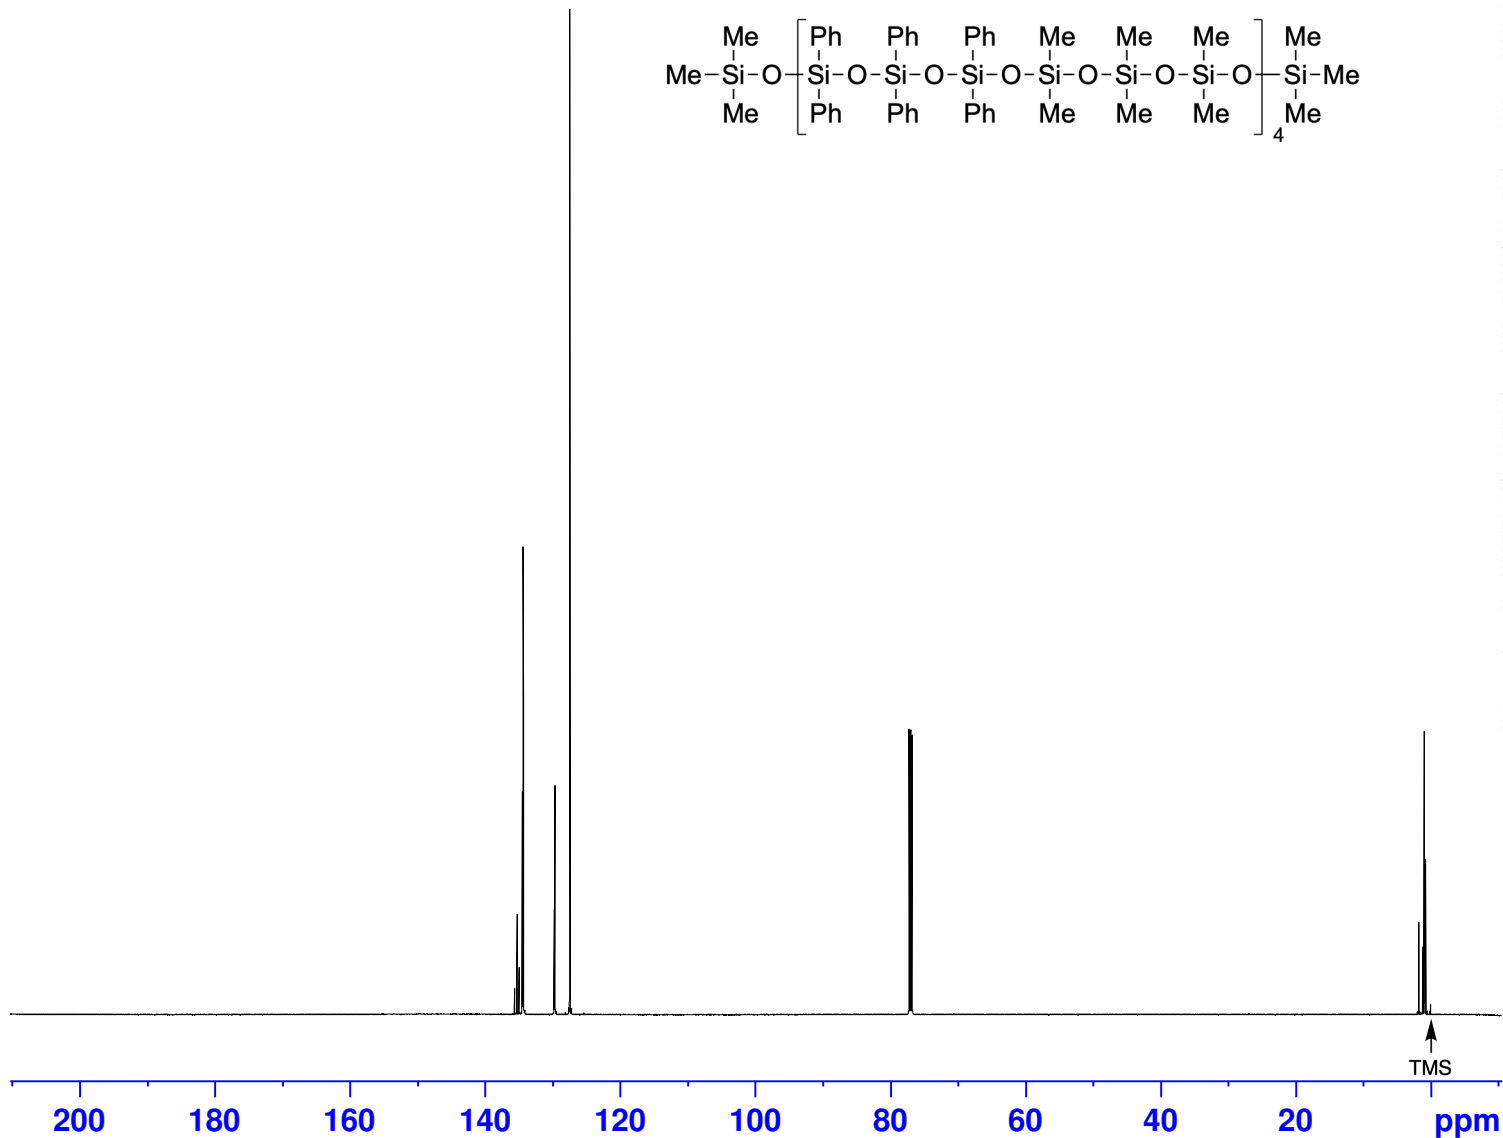

Figure S42. 1,1,1,3,3,5,5,7,7,15,15,17,17,19,19,27,27,29,29,31,31,39,39,41,41,43,43,51,51,51-Triacontamethyl-9,9,11,11,13,13,21,21,23,23,25,25,33,33,35,35,37,37,45,45,47,47,49,49-tetracosaphenylhexacosasiloxane (10)  
 29Si NMR

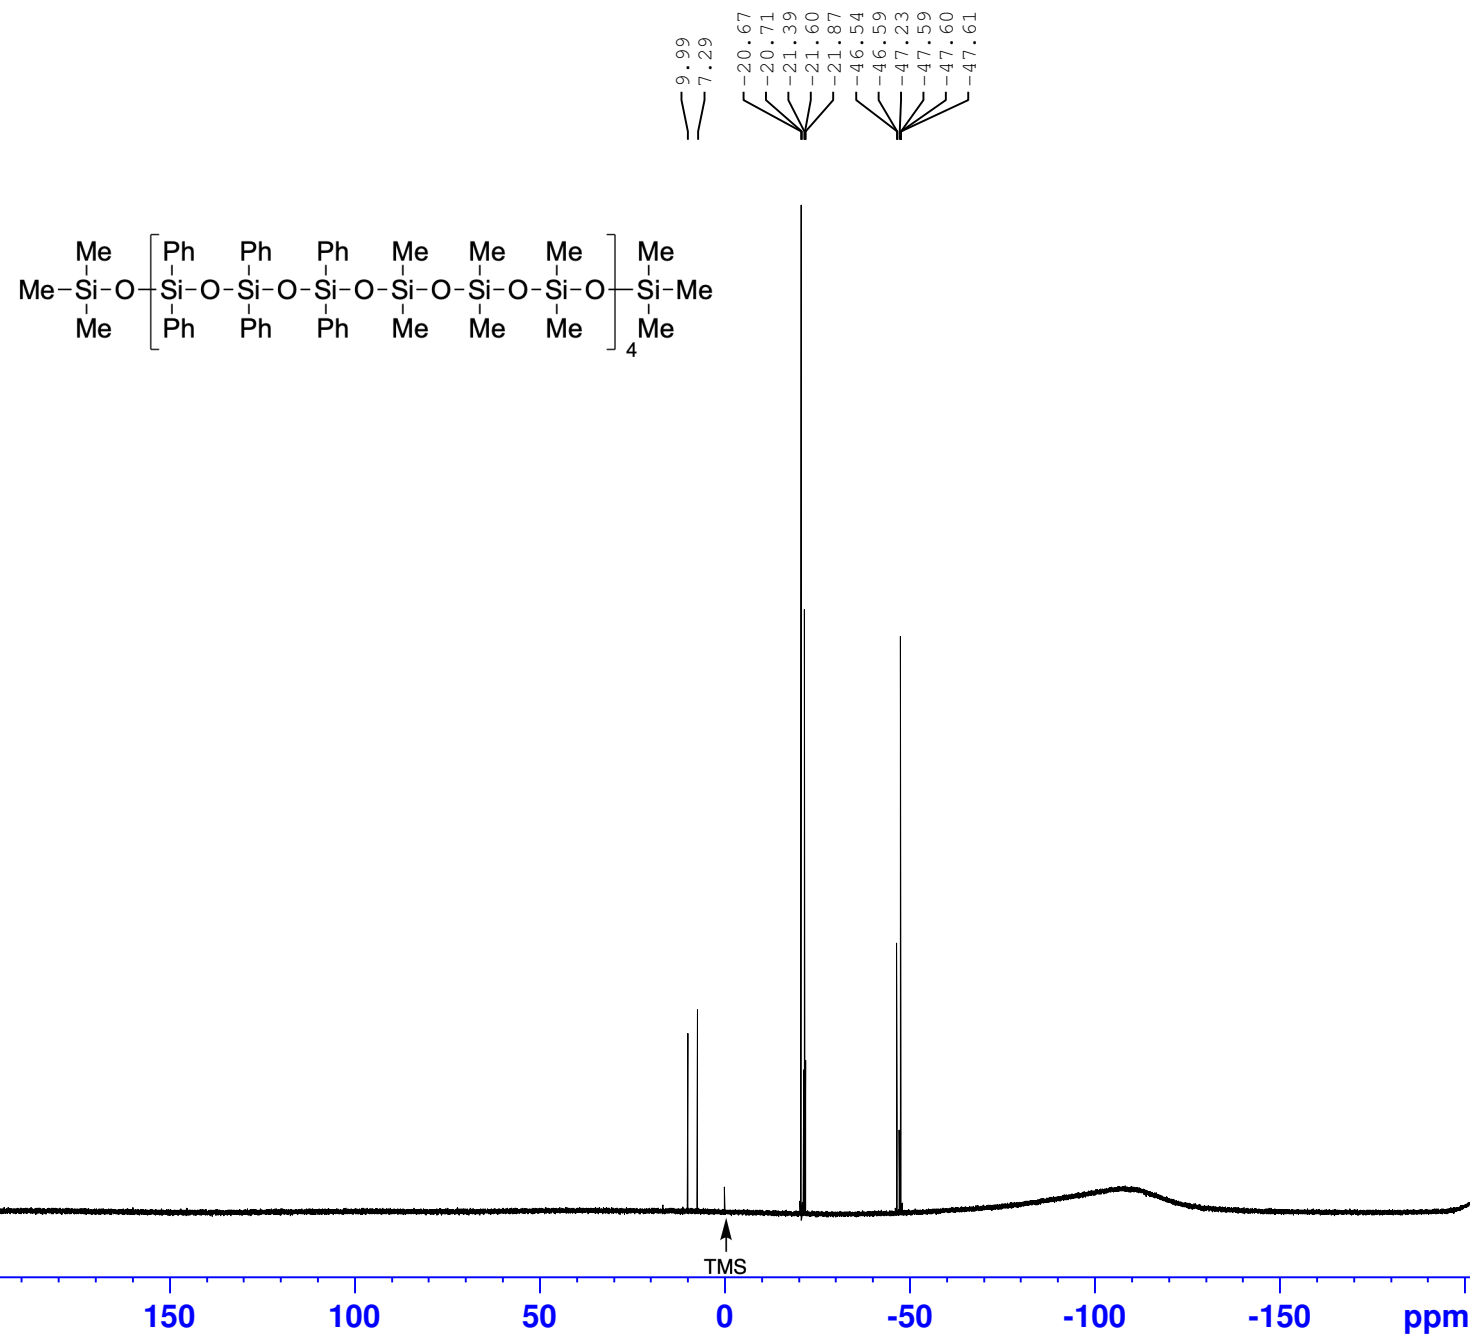

Current Data Parameters  
 NAME kawatsu-1343-(26mer-c)\_AAABBB  
 EXPNO 34  
 PROCNO 1

F2 - Acquisition Parameters  
 Date\_ 20210804  
 Time 3.54 h  
 INSTRUM spect  
 PROBHD 2132572\_0019 (  
 PULPROG zgig30  
 TD 131072  
 SOLVENT CDC13  
 NS 512  
 DS 2  
 SWH 48076.922 Hz  
 FIDRES 0.733596 Hz  
 AQ 1.3631488 sec  
 RG 193.87  
 DW 10.400 usec  
 DE 19.38 usec  
 TE 298.0 K  
 D1 10.00000000 sec  
 D11 0.03000000 sec  
 TD0 1  
 SFO1 119.2488165 MHz  
 NUC1 29Si  
 P0 4.00 usec  
 P1 12.00 usec  
 PLW1 45.00000000 W  
 SFO2 600.2324009 MHz  
 NUC2 1H  
 CPDPRG[2] waltz65  
 PCPD2 70.00 usec  
 PLW2 13.00000000 W  
 PLW12 0.38203999 W

F2 - Processing parameters  
 SI 131072  
 SF 119.2488192 MHz  
 WDW EM  
 SSB 0  
 LB 0.30 Hz  
 GB 0  
 PC 1.40

Figure S43. 1,1,1,3,3,5,5,7,7,9,9,19,19,21,21,23,23,25,25,35,35,37,37,39,39,41,41,51,51,51-Triacontamethyl-11,11,13,13,15,15,17,17,27,27,29,29,31,31,33,33,43,43,45,45,47,47,49,49-tetracosaphenylhexacosasiloxane (13)  
<sup>1</sup>H NMR

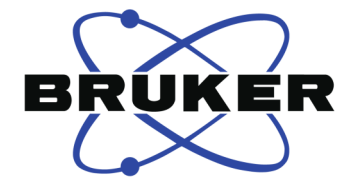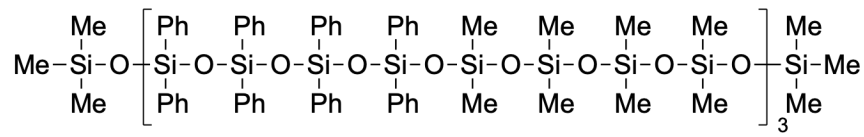

Current Data Parameters  
 NAME kawatsu-1307-(26mer-d)\_AAAABBBB  
 EXPNO 43  
 PROCNO 1

F2 - Acquisition Parameters  
 Date\_ 20210804  
 Time 4.06 h  
 INSTRUM spect  
 PROBHD Z132572\_0019 (  
 PULPROG zg30  
 TD 65536  
 SOLVENT CDCl3  
 NS 8  
 DS 2  
 SWH 12019.230 Hz  
 FIDRES 0.366798 Hz  
 AQ 2.7262976 sec  
 RG 16.19  
 DW 41.600 usec  
 DE 16.13 usec  
 TE 298.0 K  
 D1 1.00000000 sec  
 TD0 1  
 SFO1 600.2330011 MHz  
 NUC1 1H  
 P0 4.00 usec  
 P1 12.00 usec  
 PLW1 13.00000000 W

F2 - Processing parameters  
 SI 65536  
 SF 600.2300407 MHz  
 WDW EM  
 SSB 0  
 LB 0.20 Hz  
 GB 0  
 PC 1.00

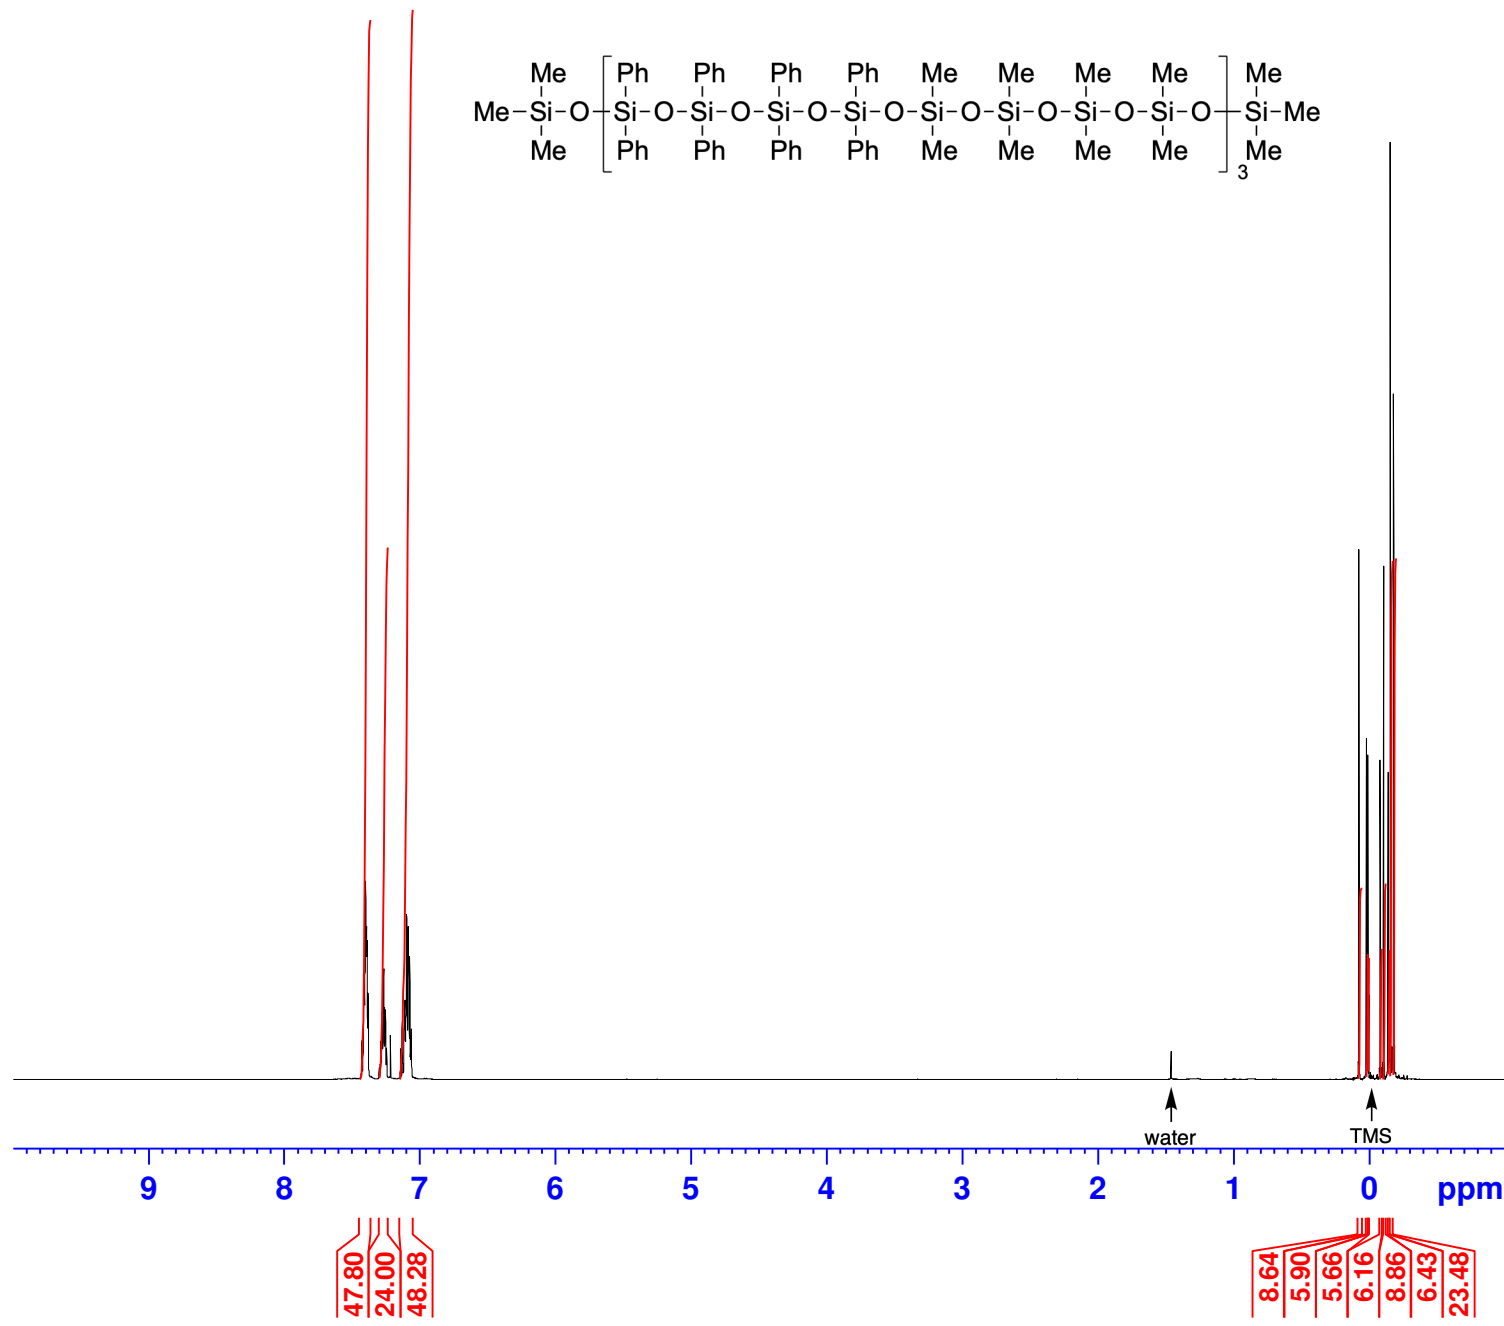

Figure S44. 1,1,1,3,3,5,5,7,7,9,9,19,19,21,21,23,23,25,25,35,35,37,37,39,39,41,41,51,51,51-Triacontamethyl-11,11,13,13,15,15,17,17,27,27,29,29,31,31,33,33,43,43,45,45,47,47,49,49-tetracosaphenylhexacosasiloxane (13)  
<sup>13</sup>C NMR

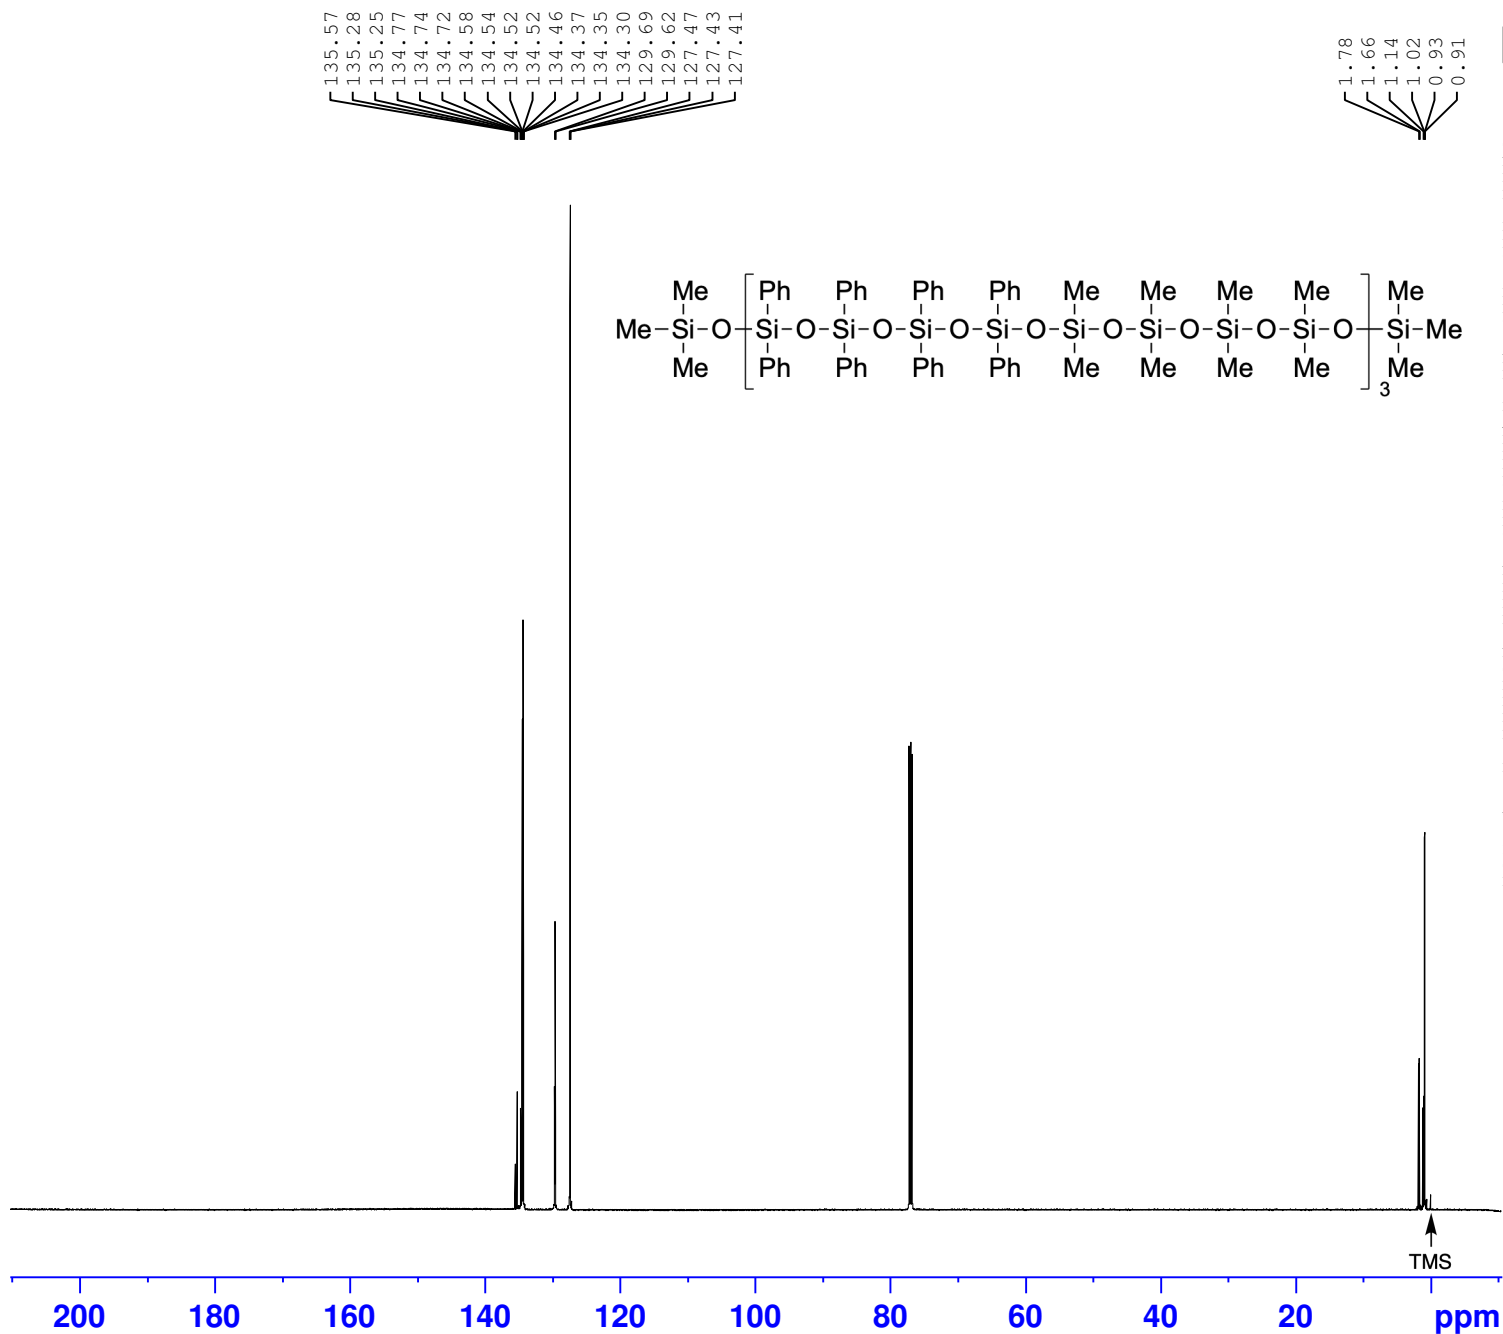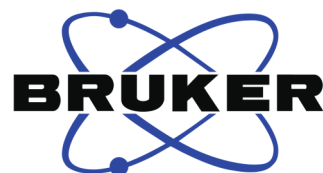

Current Data Parameters  
 NAME kawatsu-1307-(26mer-d)\_AAAAABBBB  
 EXPNO 44  
 PROCNO 1

F2 - Acquisition Parameters

Date\_ 20210804  
 Time 4.13 h  
 INSTRUM spect  
 PROBHD z132572\_0019 (zpgg30)  
 PULPROG zpgg30  
 TD 65536  
 SOLVENT CDCl3  
 NS 128  
 DS 2  
 SWH 33333.332 Hz  
 FIDRES 1.017253 Hz  
 AQ 0.9830400 sec  
 RG 193.87  
 DW 15.000 usec  
 DE 18.14 usec  
 TE 298.0 K  
 D1 2.00000000 sec  
 D11 0.03000000 sec  
 TD0 1  
 SFO1 150.9430463 MHz  
 NUC1 13C  
 PO 3.33 usec  
 P1 10.00 usec  
 PLW1 34.00000000 W  
 SFO2 600.2324009 MHz  
 NUC2 1H  
 CPDPRG[2] waltz65  
 PCPD2 70.00 usec  
 PLW2 13.00000000 W  
 PLW12 0.38203999 W  
 PLW13 0.19216000 W

F2 - Processing parameters

SI 65536  
 SF 150.9279635 MHz  
 WDW EM  
 SSB 0  
 LB 1.00 Hz  
 GB 0  
 PC 1.40

Figure S45. 1,1,1,3,3,5,5,7,7,9,9,19,19,21,21,23,23,25,25,35,35,37,37,39,39,41,41,51,51,51-Triacontamethyl-11,11,13,13,15,15,17,17,27,27,29,29,31,31,33,33,43,43,45,45,47,47,49,49-tetracosaphenylhexacosasiloxane (13)  
 29Si NMR

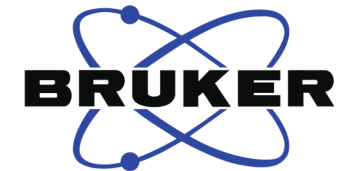

Current Data Parameters  
 NAME kawatsu-1307-(26mer-d)\_AAAABBBB  
 EXPNO 45  
 PROCNO 1

F2 - Acquisition Parameters  
 Date\_ 20210804  
 Time 5.53 h  
 INSTRUM spect  
 PROBHD z132572\_0019 (  
 PULPROG zgig30  
 TD 131072  
 SOLVENT CDCL3  
 NS 512  
 DS 2  
 SWH 48076.922 Hz  
 FIDRES 0.733596 Hz  
 AQ 1.3631488 sec  
 RG 193.87  
 DW 10.400 usec  
 DE 19.38 usec  
 TE 298.0 K  
 D1 10.0000000 sec  
 D11 0.03000000 sec  
 TD0 1  
 SFO1 119.2488165 MHz  
 NUC1 29Si  
 PO 4.00 usec  
 P1 12.00 usec  
 PLW1 45.0000000 W  
 SFO2 600.2324009 MHz  
 NUC2 1H  
 CPDPRG[2] waltz65  
 PCPD2 70.00 usec  
 PLW2 13.0000000 W  
 PLW12 0.38203999 W

F2 - Processing parameters  
 SI 131072  
 SF 119.2488192 MHz  
 WDW EM  
 SSB 0  
 LB 0.30 Hz  
 GB 0  
 PC 1.40

9.93  
 7.29  
 -20.67  
 -20.70  
 -21.36  
 -21.79  
 -21.82  
 -21.83  
 -21.84  
 -22.07  
 -46.39  
 -46.41  
 -46.44  
 -47.27  
 -47.62

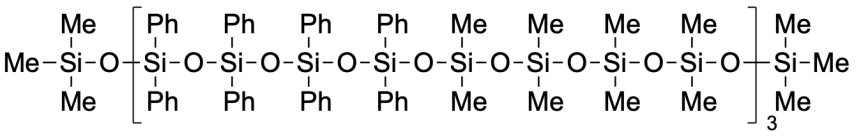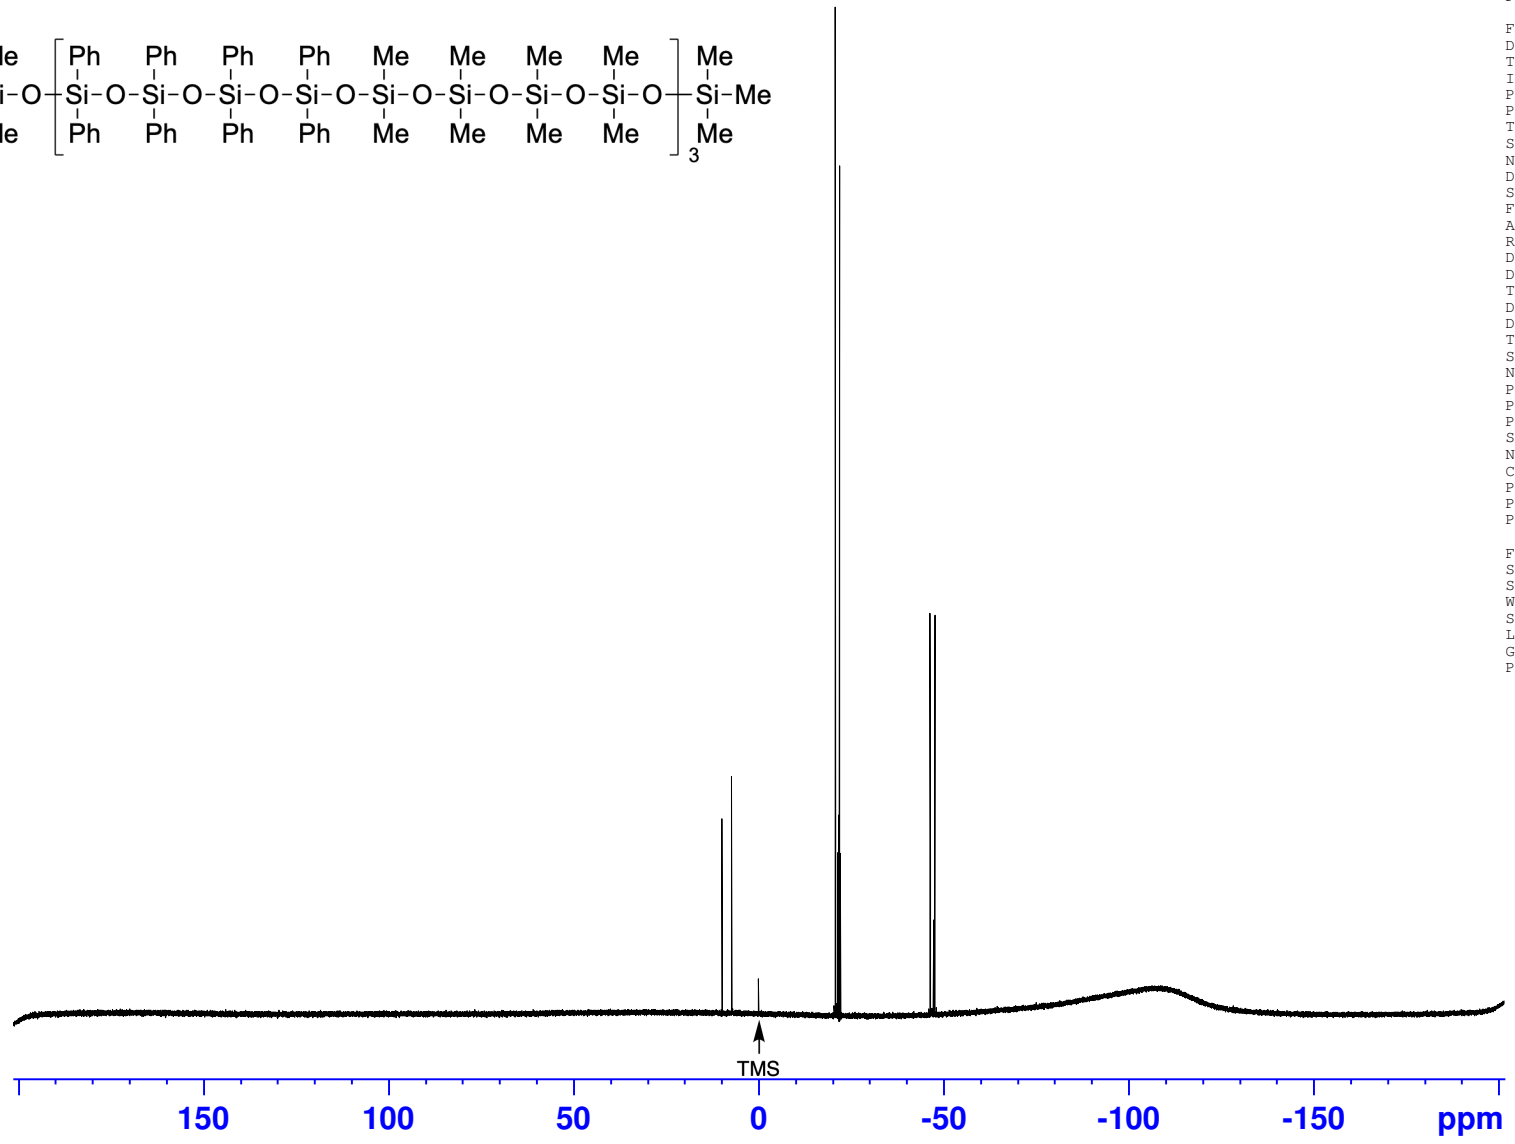

## ***References***

- S1 T. Kawatsu, J.-C. Choi, K. Sato and K. Matsumoto, *Macromol. Rapid Commun.*, 2021, **42**, 2000593.
- S2 J. A. Cella and J. C. Carpenter, *J. Organometallic Chem.*, 1994, **480**, 23–26.
